# Supplementary material for: Neglected Mendelian causes of stroke in adult Chinese patients who had an ischaemic stroke or transient ischaemic attack
Source: PubMed Central journal article supplement — Stroke Vasc Neurol. 2023 Jul 26;9(3):194–201. doi: 10.1136/svn-2022-002158 (PMC11221298; doi:10.1136/svn-2022-002158), 2023-07-26
Supplement: svn-2022-002158supp001.pdf [file svn-2022-002158supp001.pdf]

## Supplemental Files

### Section 1 eMethods

### Sections 2 eFigures and eTables

**eFigure 1. Flow chart illustrating the patients screening process**

**eTable 1. The classification of the stroke etiology for each gene**

**eTable 2. List of the 181 genes associated with Mendelian-stroke in custom-designed panel**

**eTable 3. Diagnoses of 759 individuals with 1 P/LP variant at risk for one monogenic diseases**

**eTable 4. Diagnoses of 29 individuals harbored more than 2 P/LP variants in different genes**

**eTable 5. Four individuals with 2 P/LP variants in the *ABCC6* gene**

**eTable 6. Characteristics of the Patients with one MGD in C3 cohort**

**eTable 7. The characteristics of individuals who had been diagnosed monogenic stroke before gene testing**

## eMethods

### NGS data analysis

#### Updating PVS1, PS1, PP2, and BP1 lists for InterVar

Since the publishing of InterVar software in 2017, a great deal of newly-found pathogenic mutations has been discovered. To incorporate these progresses, we updated the PVS1, PS1, PP2, and BP1 lists of InterVar using recently released ClinVar database (ClinVar 20200622 version). All of the updating process was conducted using the same pipeline of InterVar or under the guidelines of the American College of Medical Genetics and Genomics and the Association for Molecular Pathology.<sup>[1,2]</sup>

#### PVS1 gene list

Genes in PVS1 list harbored loss-of-function (LOF) mutations that were reported to be pathogenic. First, we extracted all of the pathogenic/likely pathogenic (PLP) and LOF mutations from ClinVar. The genetic variants in ClinVar 20200622 version were regarded to be PLP and LOF mutations if: 1) the variant was recorded by MedGen; 2) its minor allele frequency (MAF) < 5%; 3) it was not predicted or reported to be “benign”, “likely benign”, or “uncertain significance” in ClinVar; 4) the record of the mutation in ClinVar should not contain the string “conflicting”; 5) the mutations resulted in stopgain, stoploss, frameshift, destruction of canonical  $\pm 1$  or 2 splice sites ( $\text{dbscSNV} \geq 0.6$ ), loss of initiation codon, or deletion of single or multiple exons. The mutations that fulfill all of the above 5 criteria were regarded to be PLP and LOF mutations. We found 3312 genes that harbored these mutations, and these genes were included in updated PVS1 gene list.

Second, another part of PVS1 gene list were obtained by retrieving the LOF-mutation-intolerant genes from genomAD. A total of 3075 Genes with  $\text{pLI} \geq 0.9$  were identified and included in PVS1 gene list.

After integration and removing duplications for the 3312 and 3075 genes, a total of 5646 genes were resolved. This list was regarded to be the updated PVS1 gene list, and 150 out of the 181 genes were present in this list.

#### PS1 mutation list

PS1 list contained nonsynonymous mutations that were reported to be pathogenic. Therefore, we first extracted all of the PLP mutations from ClinVar. The genetic variants in ClinVar 20200622 version were regarded to be nonsynonymous PLP mutations if: 1) the variant was recorded by MedGen; 2) its minor allele frequency (MAF) < 5%; 3) it was not predicted or reported to be “benign”, “likely benign”, or “uncertain significance” in ClinVar; 4) the record of the mutation in ClinVar should not contain the string “conflicting”; 5) the mutations resulted in nonsynonymous mutation. We found 35767 genetic variants that fulfill all of the above 5 criteria, and they were allocated in the updated PS1 list.

#### PP2 gene list

In a certain gene, if >80% of the pathogenic variants were missense while <10% of missense variants were benign in ClinVar, the gene would be assigned to the PP2 gene list. Accordingly, the PP2 gene list was obtained through 2 steps. First, for each gene that was recorded by ClinVar, we counted the number of PLP variants and calculated the percentage of nonsynonymous mutations among the PLP variants. The genetic variants in ClinVar 20200622 version were regarded to be PLP mutations if: 1) the variant was recorded by MedGen; 2) its minor allele frequency (MAF) < 5%; 3) it was not predicted or reported to be “benign”, “likely benign”, or “uncertain significance” in ClinVar; 4) the record of the mutation in ClinVar should not contain the string “conflicting”. The mutations that fulfill all of the above 4 criteria were regarded to be PLP mutations. Additionally, nonsynonymous PLP mutations should further fulfill a

5th criterion that the PLP variants would result in nonsynonymous mutations. Then the percentage of pathogenic variants that were missense was obtained for each gene.

In the second step, we counted the number of nonsynonymous variants and calculated the percentage of benign/likely benign (BLB) mutations in each gene. Genetic variants were applied in this calculation if: 1) the variant was recorded by MedGen; 2) its minor allele frequency (MAF) < 5%; 3) the mutations were nonsynonymous substitutions. For BLB variants, another 2 criteria should be fulfilled that: 4) the record of the mutation in ClinVar should not contain the string “conflicting”; 5) it was not predicted or reported to be “pathogenic”, “likely pathogenic”, or “uncertain significance” in ClinVar record. Then the percentage of nonsynonymous variants that were BLB was obtained for each gene.

Afterwards, based on the above 2 percentages, we 490 genes that fulfilled the criteria of PP2 genes, these genes made up the updated PP2 gene list. A total of 22 genes in the 181 candidate genes were present in the updated PP2 gene list.

### **BP1 gene list**

In a certain gene, if >80% of the pathogenic variants were truncating mutation, the gene would be contained in BP1 gene list. Therefore, for each gene that was recorded by ClinVar, we counted the number of PLP variants and calculated the percentage of truncating mutations. The genetic variants in ClinVar 20200622 version were regarded to be PLP mutations if: 1) the variant was recorded by MedGen; 2) its minor allele frequency (MAF) < 5%; 3) it was not predicted or reported to be “benign”, “likely benign”, or “uncertain significance” in ClinVar; 4) the record of the mutation in ClinVar should not contain the string “conflicting”. The mutations that fulfill all of the above 4 criteria were regarded to be PLP mutations.

Afterwards, we calculated the percentage of PLP mutations that resulted in stopgain, stoploss, frameshift, destruction of canonical  $\pm 1$  or 2 splice sites ( $\text{dbscSNV} \geq 0.6$ ), loss of initiation codon, or deletion of single or multiple exons, and the genes with this percentage >80% was rated as BP1 genes. In summary, we found 604 BP1 genes and 9 out of the 181 genes were contained in the updated BP1 gene list.

### **Phenotyping:**

All individuals that harbored pathogenic/likely pathogenic variants that had an expected phenotype based off of the inheritance pattern of the disease, and were not given a clinical diagnosis were classified into the following four categories (Unlikely, Possible, Probable, Definite) based off of the criteria listed below after Electronic Health Record (EHR) review.

#### Dilated Cardiomyopathy (DCM):

Dilated cardiomyopathy is clinically diagnosed based on echocardiography. Its diagnostic criteria are as follows:<sup>[3]</sup> 1. The end-diastolic inner diameter of the left ventricle is greater than 5.5 cm in men and 5.0 cm in women. 2. The ejection fraction is less than 45%, or the left ventricular shortening rate is less than 25%. It is more scientific that the end-diastolic inner diameter of the left ventricle per square meter is greater than 2.7cm. Before diagnosing dilated cardiomyopathy, it is necessary to rule out heart enlargement caused by hypertension, coronary heart disease (CAD), valvular heart disease, congenital heart disease, alcoholic cardiomyopathy, etc.

Definite: N/A

Possible: The end-diastolic inner diameter of the left ventricle, greater than 5.5cm in men and 5.0cm in women

Or the ejection fraction is less than 45%;

Or the left ventricular shortening rate is less than 25%;

Or have heart failure in past history;

Or sudden cardiac death in family history;

Unlikely: Normal cardiac imaging (echocardiography or cardiac MRI) with EF>50% OR cardiomyopathy (EF<45%) with significant CAD\*

\*Significant CAD was defined as  $\geq 75\%$  stenosis in the left main, proximal left anterior descending coronary arteries, or  $\geq 2$  epicardial coronary arteries or history of myocardial infarction

#### Hypertrophic cardiomyopathy (HCM)

HCM is typically defined by the presence of unexplained left ventricular hypertrophy (LVH) with a maximum wall thickness  $\geq 15$  mm in adults or a z-score  $>3$  in children.<sup>[4-6]</sup> If there is a family history of HCM, or if genetic testing confirms that a relative has inherited the family's pathogenic sarcomere variant, a maximum LV wall thickness  $\geq 13$  mm supports diagnosis. Such LVH occurs in a non-dilated ventricle in the absence of other cardiac or systemic disease capable of producing the observed magnitude of increased LV wall thickness, such as pressure overload or storage/infiltrative disorders.

- Definite: Septal wall thickness  $\geq 1.5$  cm on echocardiography with no hypertension, coronary heart disease (CAD), valvular heart disease, congenital heart disease, alcoholic cardiomyopathy.
- Possible: Septal wall thickness  $\geq 1.3$  cm on echocardiography or  $<1.3$  cm and EF<45% in the absence of an ischemic etiology\*
- Unlikely: Septal wall thickness  $< 1.3$  cm on echocardiography and EF>50%

An additional requirement for classification was the presence of at least one echocardiography study

\*Ischemic etiology was defined as  $\geq 75\%$  stenosis in the left main OR proximal left anterior descending coronary arteries OR  $\geq 2$  epicardial coronary arteries or a history of myocardial infarction

#### Fabry Disease

##### **Suggestive Findings**

Fabry disease should be suspected in males and females with the following clinical features:

Periodic crises of severe pain in the extremities (acroparesthesia)

Vascular cutaneous lesions (angiokeratomas)

Sweating abnormalities (anhidrosis, hypohidrosis, and rarely hyperhidrosis)

Characteristic corneal and lenticular opacities

Unexplained stroke

Unexplained left ventricular hypertrophy

Renal insufficiency of unknown etiology including unexplained proteinuria or microalbuminuria

The diagnosis of Fabry disease is established in a **male proband** by:

Identification of deficient alpha-galactosidase A ( $\alpha$ -Gal A) enzyme activity in plasma, isolated leukocytes, and/or cultured cells. The test is a fluorometric assay and uses the substrate 4-methylumbelliferyl- $\alpha$ -D-galactopyranoside.

Males with classic Fabry disease have  $<1\%$   $\alpha$ -Gal A enzyme activity.

Males with atypical Fabry disease have residual enzyme activity  $>1\%$  of normal.

Identification of a hemizygous pathogenic variant in GLA by molecular genetic testing

**Female proband.** The diagnosis of Fabry disease is established in a female proband by identification of

a heterozygous pathogenic variant in GLA by molecular genetic testing.

- Definite: N/A
- Possible: unexplained left ventricular hypertrophy with a hemizygous pathogenic variant in GLA in Males or a heterozygous pathogenic variant in females.
- Unlikely: No above clinical features with a pathogenic variant in GLA.

Unexplained left ventricular hypertrophy

Familial Transthyretin (TTR) Amyloidosis:

Because there is no formal diagnostic criteria for Familial *TTR* amyloidosis, individuals were classified based on the number of neurologic and/or cardiac signs/symptoms that were documented in the EHR of the respective individual. Individuals that harbored pathogenic/likely pathogenic mutations associated with Familial *TTR* amyloidosis were classified into the four categories based off of the following criteria:<sup>[7]</sup>

- Definite: N/A
- Probable: One Cardiac and one Neurologic Manifestation
- Possible: One Cardiac or one Neurologic Manifestation
- Unlikely: Normal Cardiac Imaging and no documented Neurologic signs/symptoms

A cardiac manifestation is defined as documentation of at least one of the following:

- Left ventricular hypertrophy in the absence of an alternative cause
- Heart Failure with preserved ejection fraction
- Restrictive cardiomyopathy
- Conduction disease: Atrioventricular block on electrocardiogram (EKG)
- Presence of a pericardial effusion on echocardiography in the absence of an alternative cause

A neurologic manifestation is defined as documentation of at least one of the following:

- Sensory disturbances of unknown etiology
- Neuropathic pain
- Autonomic disturbances

Atrial fibrillation (AF)

Body surface electrocardiogram (ECG) or 24-hour Holter electrocardiogram shows irregular shape and size of f wave instead of P wave, frequency 350-600 beats/min, QRS complex form is standard form or with ventricular differential conduction and wide deformity, ventricular rate is absolute irregular

- Definite: ECG or 24 Holter showed AF signs and had AF history or AD family history.
- Possible: ECG or 24 Holter showed AF signs or other type of arrhythmia
- Unlikely: ECG or 24 Holter showed normal and no arrhythmia history.

Familial Hypercholesterolemia:

Individuals that harbored a pathogenic/likely pathogenic variant associated with familial hypercholesterolemia who were heterozygous for mutations in the LDLR gene were categorized according to the Simon-Broome criteria as follows:

- Definite: Serum LDL-C\* $\geq$ 190 mg/dL or Total Cholesterol (TC)\* $\geq$ 280 mg/dL
- Possible: After the LDL-C and TC values were corrected, Serum LDL-C\* $\geq$ 190 mg/dL or Total Cholesterol (TC)\* $\geq$ 280 mg/dL.
- Unlikely: Serum LDL-C\* $<$ 190 mg/dL or Total Cholesterol\* $<$ 280 mg/dL

\*If the patient was on a statin, the LDL-C and TC values were corrected using LDL/0.7 and TC/0.8, respectively.

#### Marfan Syndrome:

Individuals that harbored pathogenic/likely pathogenic mutations associated with Marfan Syndrome were classified into the four categories based off of the Revised Ghent Nosology:<sup>[8]</sup>

- Definite: N/A
- Possible: Systemic Score between 4-6 and a causal *FBN1* mutation
- Unlikely: Normal Imaging with no mention of Ectopia Lentis or Systemic Score signs/symptoms

\*Aortic Criterion: History of Aortic Dissection or an Aorta Z-score $\geq$ 2. Z-scores calculated using the patient's aortic diameter, as measured by echocardiography, using the following Z-score calculator: <https://www.marfan.org/dx/zscore>.

#### Supravalvular Aortic Stenosis (SVAS):

Individuals that harbored pathogenic/likely pathogenic variants associated with restrictive cardiomyopathy were classified into the four categories as follows:

- Definite: After aortic valve prosthetic valve replacement surgery
- Possible: Moderate Aortic Stenosis gradient with Normal Aortic Valve on echocardiography
- Unlikely: Normal Imaging

#### Thoracic aortic aneurysms and aortic dissections (TAAD):

A thoracic aortic aneurysm is a permanent, localized dilatation of the thoracic aorta. Thoracic aortic aneurysms may involve different thoracic aortic segments. To evaluate for a thoracic aortic aneurysm, the aortic diameter is measured (perpendicular to the axis of blood flow) by echocardiography, CT, or MRI at reproducible anatomic locations.

- Definite: After aortic valve prosthetic valve replacement surgery,
- Possible: Moderate Aortic Stenosis gradient with Normal Aortic Valve on echocardiography
- Unlikely: Normal Imaging

#### Neurofibromatosis 1(NF1)

##### Suggestive Findings

Neurofibromatosis 1 (NF1) should be suspected in individuals who have any of the following findings:

- Six or more café au lait macules  $>5$  mm in greatest diameter in prepubertal individuals and  $>15$  mm in greatest diameter in postpubertal individuals
- Two or more neurofibromas of any type or one plexiform neurofibroma
- Freckling in the axillary or inguinal regions
- Optic glioma
- Two or more Lisch nodules (iris hamartomas)
- A distinctive osseous lesion such as sphenoid dysplasia or tibial pseudarthrosis
- A first-degree relative (parent, sib, or offspring) with NF1 as defined by the above criteria

##### Establishing the Diagnosis

The diagnosis of NF1 is established in a proband who meets the diagnostic criteria for neurofibromatosis 1 (NF1) developed by the National Institutes of Health [NIH 1988]. The NIH diagnostic criteria for NF1 are met in an individual who has two or more of the features listed in Suggestive Findings.<sup>[9]</sup>

- Definite: NA;
- Possible: Individuals with a pathogenic variants in the NF1 gene;
- Unlikely: NA

#### Polycythemia vera

##### Major criteria

1. Hemoglobin >16.5 g/dL in men or > 16 g/dL in women; or hematocrit >49% in men or > 48% in women or increased red blood cell mass
2. Presence of JAK2 mutation

##### Minor criterion

1. Bone marrow trilineage proliferation
2. Subnormal serum erythropoietin level
3. EEC growth

Bone marrow biopsy might not be needed in the presence of hemoglobin >18.5 g/dL (hematocrit 55.5%) in men or > 16.5 g/dL (hematocrit 49.5%) in women.

- Definite: both two major criteria + one minor criterion or the first major + two minor criteria;
- Possible: two major criteria;
- Unlikely: Normal hemoglobin level

#### Essential thrombocythemia (ET)

##### Major criteria<sup>[10]</sup>

1. Platelets  $\geq 450 \times 10^9 /L$
2. Bone marrow megakaryocyte proliferation and loose clusters
3. Not meeting WHO criteria for other myeloid neoplasms
4. JAK2/CALR/MPL mutated

- Definite: all four major criteria
- Possible: two major criteria;
- Unlikely: Normal Platelets level

#### Polycystic kidney disease (PKD1 and PKD2)<sup>[11]</sup>

##### Definite:

The diagnosis of ADPKD is established in a proband with ANY of the following:

Age-specific ultrasound criteria and an affected first-degree relative with ADPKD

Age-specific MRI criteria and an affected first-degree relative with ADPKD

Identification of a heterozygous pathogenic variant in one of the genes listed in Table 3

## Ultrasound Criteria for Diagnosis of ADPKD in Individuals at 50% Risk for ADPKD Based on Family History

| Age       | PKD1                                                 | PKD2                                                 | Unknown ADPKD Genotype                             |
|-----------|------------------------------------------------------|------------------------------------------------------|----------------------------------------------------|
| 15-30 yrs | ≥3 cysts <sup>1</sup><br>PPV = 100%<br>SEN = 94.3%   | ≥3 cysts <sup>1</sup><br>PPV = 100%<br>SEN = 69.5%   | ≥3 cysts <sup>1</sup><br>PPV = 100%<br>SEN = 81.7% |
| 30-39 yrs | ≥3 cysts <sup>1</sup><br>PPV = 100%<br>SEN = 96.6%   | ≥3 cysts <sup>1</sup><br>PPV = 100%<br>SEN = 94.9%   | ≥3 cysts <sup>1</sup><br>PPV = 100%<br>SEN = 95.5% |
| 40-59 yrs | ≥2 cysts in each kidney<br>PPV = 100%<br>SEN = 92.6% | ≥2 cysts in each kidney<br>PPV = 100%<br>SEN = 88.8% | ≥2 cysts in each kidney<br>PPV = 100%<br>SEN = 90% |

Possible:

Multiple bilateral renal cysts and the absence of manifestations suggestive of a different renal cystic disease

Cysts in other organs, especially the liver, but also seminal vesicles, pancreas, and arachnoid membrane

Enlargement of the kidneys or liver on physical examination

Hypertension in an individual younger than age 35 years

An intracranial aneurysm

A family history of ADPKD

Unlikely: NA

#### Cerebral cavernous malformations-1(KRIT1)

- Intracranial thin-walled sinusoidal vessel (cavernous) malformations

- Seizures

- Headache

- Intracranial hemorrhage

- Focal neurologic deficits

- Intracranial calcifications

- Angiographically 'silent'

- MRI is best imaging modality to detect lesions

- Definite: MRI showed intracranial thin-walled sinusoidal vessel (cavernous)
- Possible: NA
- Unlikely: Normal Imaging

#### Ehlers-Danlos syndrome (EDS)

Individuals that harbored pathogenic/likely pathogenic variants associated with Ehler-Danlos Syndrome (COL5A1, COL5A2, COL1A1, or COL1A2) were classified into the three categories as follows based off of the 2017 international classification of the Ehlers–Danlos syndromes<sup>[12]</sup>

- Definite: NA
- Possible: a proband with the minimal clinical diagnostic criteria (intracranial aneurysms and arteriovenous fistulae, may occur in the rare individual ) and identification of a heterozygous pathogenic variant in COL1A1 or COL1A2
- Unlikely: None of the above clinical manifestations



Cerebral amyloid angiopathy, GSN-related

- Cranial neuropathy, esp. facial paresis
- Bulbar palsy
- Peripheral polyneuropathy, esp. vibration and touch loss
- Amyloid cardiomyopathy
- Renal failure
- Cutis laxa
- Corneal lattice dystrophy
- Definite: NA
- Possible: Diagnosed with CAA by imaging
- Unlikely: None of the above clinical manifestations

Thrombophilia due to thrombin defect due to F2 defect

- Definite: NA
- Possible: Thrombosis, recurrent, cognitive function loss
- Unlikely: None of the above clinical manifestations

Hyperchylomicronemia, late-onset APOA5

- Definite: NA
- Possible: Decreased LDL and HDL, increased TG, stroke
- Unlikely: None of the above clinical manifestations

HTRA1-autosomal dominant disease

HTRA1 heterozygous mutations may lead to a late-onset syndrome characterized by gait disturbances, mood depression, cognitive impairment, stroke, migraine as well as WMHs on MRI.

- Definite: NA
- Possible: HTRA1 heterozygous mutations and a late-onset stroke as well as WMHs
- Unlikely: Just a HTRA1 heterozygous mutations with none of the above clinical manifestations.

Cerebral Autosomal Dominant Arteriopathy with Subcortical Infarcts and Leukoencephalopathy (CADASIL)<sup>[13]</sup>

## Clinical criteria

#1 Age at onset (clinical symptoms #2 or white matter lesions)  $\leq$ 55 years old.

#2 At least two of the following clinical findings:

- a. Either of subcortical dementia, long tract signs, or pseudobulbar palsy.
- b. Stroke-like episode with a focal neurological deficit.
- c. Mood disorder.
- d. Migraine.

#3 Autosomal dominant inheritance.

#4 White matter lesions involving the anterior temporal pole by MRI or CT.

#5 Exclusion of leukodystrophy (Adrenoleukodystrophy, metachromatic leukodystrophy, etc.).

## Genetic criteria

NOTCH3 mutations localize in exons 2–24 and result in the gain or loss of

cysteine residues in the epidermal growth factor-like repeat domain.

Cysteine-sparing variants should be carefully evaluated by skin biopsy and segregation studies

Pathological criteria

The pathological hallmark of CADASIL is granular osmiophilic material (GOM) detected by electron microscopy. Immunostaining of NOTCH3 extracellular domain is also useful.

Definite:

CADASIL is definite when the individual fulfills

- (1) White matter lesions by MRI or CT.
- (2) Clinical criteria #5
- (3) Genetic criteria and/or pathological criteria

Possible:

CADASIL is possible when the individual has abnormal white matter lesions (Fazekas grade  $\geq 2$ ) and fulfills either of

- (1)  $\leq 55$  years old
- (2) At least one of the symptoms in clinical criteria #2

Unlikely:

No phenotype

#### Retinal vasculopathy with cerebral leukoencephalopathy and systemic manifestations (RVCL-S)

Major features

#1 Vascular retinopathy typically manifesting as decreased visual acuity and/or visual field defects

#2 Focal neurologic signs can include but are not limited to hemiparesis, facial weakness, aphasia, and hemianopsia.

#3 Global brain dysfunction may manifest as progressive cognitive impairment.

#4 Brain MRI abnormalities are restricted to the white matter

(1) Focal, non-enhancing T2-hyperintense lesions scattered throughout the periventricular and deep white matter (at an age when nonspecific age-related white matter hyperintensities are infrequent)

(2) Punctate T2-hyperintense white matter lesions with nodular enhancement

(3) Hyperintense mass lesions on T2 and hypointense lesions on T1-weighted images, enhanced with gadolinium contrast, and often surrounded by extensive edema. Hemorrhages are rarely reported. Occasionally, restricted diffusion, most often centrally, is observed and is referred to as a "pseudotumor."

#5 Family history of middle-age onset of disease manifestations consistent with an autosomal dominant inheritance pattern.

#6 Exclusion of leukodystrophy AND brain tumor.

Supportive features

Calcifications on brain CT scan, typically not present in healthy controls

Nonspecific MRI white matter lesions that occur more frequently than expected given the age of the individual

Microvascular liver disease, manifested by modest elevations of alkaline phosphatase and gamma-glutamyltransferase

Microvascular kidney disease, typically manifested by a mild-to-moderate increase in serum creatinine or by proteinuria

### Pathology

Histologic abnormalities have been demonstrated in all organs involved in RVCL-S, including the following.

- (1)Retina: scattered microinfarcts, thickened hyalinized retinal arterial walls, focal areas of disruption of the ganglion cell layer and inner nuclear layer.
- (2)Brain: Multiple – often confluent – foci of ischemic necrosis of white matter, Vasculopathy (vessel wall thickening and luminal stenosis; telangiectasias), a modest chronic inflammatory cell infiltrate in some individuals, focal calcifications and reactive astrocytosis, myelin loss.
- (3)Kidney: renal arteriolosclerosis, focal or diffuse glomerulosclerosis
- (4)Liver:Nodular regenerative hyperplasia, micro- and macrovesicular steatosis, periportal inflammation, bridging and portal fibrosis.

#### Definite:

RVCLS is definite when the individual fulfills

- (1) fulfills either of Major features
- (2) Clinical criteria #6
- (3) Genetic criteria and/or pathological criteria

#### Possible:

RVCLS is possible when the individual has either of Major features or fulfills more than three of Supportive features

#### Unlikely:

No phenotype

### Brain small vessel disease with or without ocular anomalies (COL4A1)

#### Major features

- (1)Porencephaly
- (2)Brain small-vessel disease with or without ocular anomalies
- (3)HANAC (hereditary angiopathy with nephropathy, aneurysms, and muscle cramps) syndrome
- (4)Tortuosity of retinal arteries
- (5)Nonsyndromic autosomal dominant congenital cataract

#### Definite:

- (1) fulfills either of Major features and
- (2) Genetic criteria and/or pathological criteria

#### Possible:

Col4a1 is possible when the individual has either of Major features

#### Unlikely:

No phenotype

### Brain small vessel disease 2 (COL4A2)

#### Major features

- (1)Porencephaly
- (2)Brain small-vessel disease with intracranial hemorrhage
- (3)cerebellar and optic atrophy,cataracts, intracranial aneurysms, nephropathy, and myopathy .

#### Definite:

- (1) fulfills either of Major features and

## (2) Genetic criteria

Possible:

Col4a1 is possible when the individual has either of Major features

Unlikely:

No phenotype

MOYAMOYA (RNF213)

## Diagnostic Criteria

(1) Cerebral angiography is considered essential for the diagnosis, and must show at least the following findings:

(i) Stenosis or occlusion of the terminal portion of the intracranial internal carotid artery or proximal portions of the anterior and/or the middle cerebral artery.

(ii) Abnormal vascular networks in the vicinity of the occlusive or stenotic lesions in the arterial phase.

(iii) Bilaterality of findings (i) and (ii).

(2) However, when magnetic resonance imaging (MRI) and magnetic resonance angiographic (MRA) findings meet all of the following criteria, cerebral angiography can be omitted. See the "Guidelines for Diagnostic Imaging by MRI and MRA"

(i) MRA shows stenosis or occlusion of the terminal portion of the intracranial internal carotid artery or proximal portions of the anterior and/or the middle cerebral artery.

(ii) MRA shows abnormal vascular networks in the basal ganglia.

Note: When 2 or more visible flow voids are present in the basal ganglia on MRI, at least unilaterally, they can be deemed as representing an abnormal vascular network.

(iii) Bilaterality of findings (i) and (ii).

(3) Moyamoya disease is an illness of unknown etiology. The differential diagnosis of this disease includes similar cerebrovascular lesions associated with the following underlying diseases, which should, therefore, be excluded: (i) atherosclerosis, (ii) autoimmune disease, (iii) meningitis, (iv) brain tumors, (v) Down's syndrome, (vi) von Recklinghausen's disease, (vii) head injury, (viii) cerebrovascular lesions after head irradiation, and (ix) others.

Pathological findings that can be used as references for the diagnosis

Thickening of the arterial intima, mainly in the terminal portion of the internal carotid arteries, and narrowing or blockage of the lumen caused by this change, usually bilateral. Occasionally, lipid deposits are also present in the thickened intima.

Arteries such as the anterior, middle, and posterior cerebral arteries forming the circle of Willis occasionally show varying degrees of stenosis or occlusion associated with fibrocellular thickening of the intima, and thinning of the media.

Numerous small vascular channels (perforating and anastomotic branches) can be seen around the circle of Willis.

Pia mater may also show reticular conglomerates of small vessels.

Diagnostic assessment:

Definite:

All criteria listed in (1) or (2) and in (3) should be met.

Possible:

All criteria are fulfilled except item (1)(iii) and/or item (2)(iii) among the criteria of (1) or (2) and (3).

Unlikely:

No phenotype

## eReference

1. Li Q, Wang K. InterVar: Clinical Interpretation of Genetic Variants by the 2015 ACMG-AMP Guidelines. *Am J Hum Genet* 2017;100(2):267-80. doi: 10.1016/j.ajhg.2017.01.004 [published Online First: 2017/01/31]
2. Richards S, Aziz N, Bale S, et al. Standards and guidelines for the interpretation of sequence variants: a joint consensus recommendation of the American College of Medical Genetics and Genomics and the Association for Molecular Pathology. *Genet Med* 2015;17(5):405-24. doi: 10.1038/gim.2015.30 [published Online First: 2015/03/06]
3. Japp AG, Gulati A, Cook SA, et al. The Diagnosis and Evaluation of Dilated Cardiomyopathy. *J Am Coll Cardiol* 2016;67(25):2996-3010. doi: 10.1016/j.jacc.2016.03.590 [published Online First: 2016/06/25]
4. Gersh BJ, Maron BJ, Bonow RO, et al. 2011 ACCF/AHA guideline for the diagnosis and treatment of hypertrophic cardiomyopathy: executive summary: a report of the American College of Cardiology Foundation/American Heart Association Task Force on Practice Guidelines. *J Am Coll Cardiol* 2011;58(25):2703-38. doi: 10.1016/j.jacc.2011.10.825 [published Online First: 2011/11/15]
5. Authors/Task Force m, Elliott PM, Anastakis A, et al. 2014 ESC Guidelines on diagnosis and management of hypertrophic cardiomyopathy: the Task Force for the Diagnosis and Management of Hypertrophic Cardiomyopathy of the European Society of Cardiology (ESC). *Eur Heart J* 2014;35(39):2733-79. doi: 10.1093/eurheartj/ehu284 [published Online First: 2014/09/01]
6. Maron BJ, Towbin JA, Thiene G, et al. Contemporary definitions and classification of the cardiomyopathies: an American Heart Association Scientific Statement from the Council on Clinical Cardiology, Heart Failure and Transplantation Committee; Quality of Care and Outcomes Research and Functional Genomics and Translational Biology Interdisciplinary Working Groups; and Council on Epidemiology and Prevention. *Circulation* 2006;113(14):1807-16. doi: 10.1161/CIRCULATIONAHA.106.174287 [published Online First: 2006/03/29]
7. Ando Y, Coelho T, Berk JL, et al. Guideline of transthyretin-related hereditary amyloidosis for clinicians. *Orphanet J Rare Dis* 2013;8:31. doi: 10.1186/1750-1172-8-31 [published Online First: 2013/02/22]
8. Loeys BL, Dietz HC, Braverman AC, et al. The revised Ghent nosology for the Marfan syndrome. *J Med Genet* 2010;47(7):476-85. doi: 10.1136/jmg.2009.072785 [published Online First: 2010/07/02]
9. Neurofibromatosis. Conference statement. National Institutes of Health Consensus Development Conference. *Arch Neurol* 1988;45(5):575-8. [published Online First: 1988/05/01]
10. Tefferi A, Thiele J, Orazi A, et al. Proposals and rationale for revision of the World Health Organization diagnostic criteria for polycythemia vera, essential thrombocythemia, and primary myelofibrosis: recommendations from an ad hoc international expert panel. *Blood* 2007;110(4):1092-7. doi: 10.1182/blood-2007-04-083501 [published Online First: 2007/05/10]
11. Bergmann C, Guay-Woodford LM, Harris PC, et al. Polycystic kidney disease. *Nat Rev Dis Primers* 2018;4(1):50. doi: 10.1038/s41572-018-0047-y [published Online First: 2018/12/14]
12. Malfait F, Francomano C, Byers P, et al. The 2017 international classification of the Ehlers-Danlos syndromes. *Am J Med Genet C Semin Med Genet* 2017;175(1):8-26. doi: 10.1002/ajmg.c.31552

[published Online First: 2017/03/18]

13. Mizuta I, Watanabe-Hosomi A, Koizumi T, et al. New diagnostic criteria for cerebral autosomal dominant arteriopathy with subcortical infarcts and leukoencephalopathy in Japan. *J Neurol Sci* 2017;381:62-67. doi: 10.1016/j.jns.2017.08.009 [published Online First: 2017/10/11]

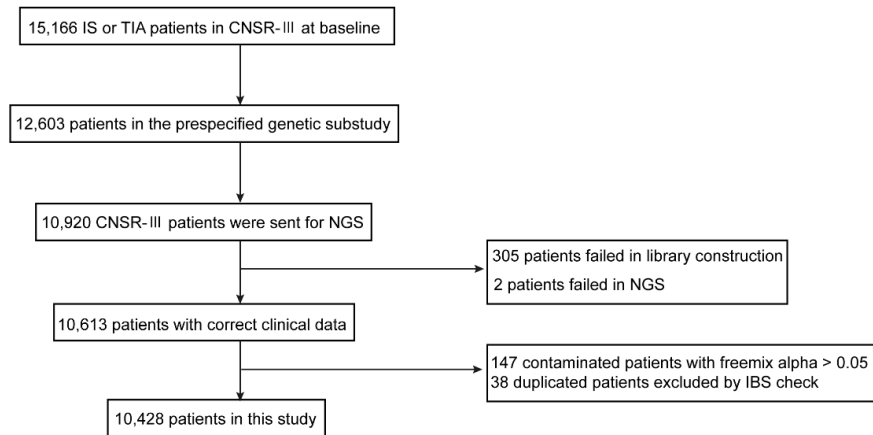

**eFigure 1. Flow chart illustrating the patients screening process**

**eTable 1 The classification of the stroke etiology for each gene**

| Gene    | Phenotype                                   | Etiology of stroke   |
|---------|---------------------------------------------|----------------------|
| RBM20   | Hereditary cardiomyopathies                 | Embolic stroke       |
| ACTC1   | Hereditary cardiomyopathies                 | Embolic stroke       |
| LMNA    | Hereditary cardiomyopathies                 | Embolic stroke       |
| MYBPC3  | Hereditary cardiomyopathies                 | Embolic stroke       |
| ACTN2   | Hereditary cardiomyopathies                 | Embolic stroke       |
| PRKAG2  | Hereditary cardiomyopathies                 | Embolic stroke       |
| BAG3    | Hereditary cardiomyopathies                 | Embolic stroke       |
| DSG2    | Hereditary cardiomyopathies                 | Embolic stroke       |
| KCNA5   | Hereditary cardiac dysrhythm                | Embolic stroke       |
| KCNJ5   | Hereditary cardiac dysrhythm                | Embolic stroke       |
| SCN4B   | Hereditary cardiac dysrhythm                | Embolic stroke       |
| KCNQ1   | Hereditary cardiac dysrhythm                | Embolic stroke       |
| GJA5    | Hereditary cardiac dysrhythm                | Embolic stroke       |
| SCN5A   | Hereditary cardiac dysrhythm                | Embolic stroke       |
| KCNJ2   | Hereditary cardiac dysrhythm                | Embolic stroke       |
| KCNH2   | Hereditary cardiac dysrhythm                | Embolic stroke       |
| KCNE2   | Hereditary cardiac dysrhythm                | Embolic stroke       |
| SCN3B   | Hereditary cardiac dysrhythm                | Embolic stroke       |
| NPPA    | Hereditary cardiac dysrhythm                | Embolic stroke       |
| SCN2B   | Hereditary cardiac dysrhythm                | Embolic stroke       |
| SCN1B   | Hereditary cardiac dysrhythm                | Embolic stroke       |
| PRKAR1A | Carney complex, type 1                      | Embolic stroke       |
| KRAS    | Noonan syndrome 3                           | Embolic stroke       |
| TLL1    | Atrial septal defect                        | Embolic stroke       |
| GJA1    | Atrioventricular septal defect 3            | Embolic stroke       |
| GATA4   | Tetralogy of Fallot                         | Embolic stroke       |
| NKX2-5  | Tetralogy of Fallot                         | Embolic stroke       |
| ZFPM2   | Tetralogy of Fallot                         | Embolic stroke       |
| GDF1    | Congenital heart defects, multiple types, 6 | Embolic stroke       |
| TTN     | Hereditary cardiomyopathies                 | Embolic stroke       |
| MFAP5   | Aortic aneurysm, familial thoracic 9        | Large artery disease |
| MYLK    | Aortic aneurysm, familial thoracic 7        | Large artery disease |
| PRKG1   | Aortic aneurysm, familial thoracic 8        | Large artery disease |
| MYH11   | Aortic aneurysm, familial thoracic 4        | Large artery disease |



eTable 1 Continued

| Gene     | Phenotype                                                                                   | Etiology of stroke                             |
|----------|---------------------------------------------------------------------------------------------|------------------------------------------------|
| ACTA2    | Aortic aneurysm, familial thoracic 6                                                        | Large artery disease                           |
| FBN1     | Marfan syndrome                                                                             | Large artery disease                           |
| ELN      | Supravalvar aortic stenosis                                                                 | Large artery disease                           |
| COL5A1   | Ehlers-Danlos syndrome, classic type                                                        | Large artery disease                           |
| COL1A1   | Combined osteogenesis imperfecta and Ehlers-Danlos syndrome 1                               | Large artery disease                           |
| COL1A2   | Combined osteogenesis imperfecta and Ehlers-Danlos syndrome 2                               | Large artery disease                           |
| CETP     | Hyperalphalipoproteinemia                                                                   | Large artery disease                           |
| RNF213   | Moyamoya disease                                                                            | Large artery disease                           |
| LDLR     | Hypercholesterolemia, familial, 1                                                           | Large artery disease                           |
| APOA5    | Hyperchylomicronemia, late-onset                                                            | Large artery disease                           |
| F2       | Thrombophilia due to thrombin defect                                                        | Prothrombotic state                            |
| JAK2     | Thrombocytopenia 3                                                                          | Prothrombotic state                            |
| VWF      | von Willebrand disease, type 1                                                              | Prothrombotic state                            |
| GP1BA    | von Willebrand disease, platelet-type                                                       | Prothrombotic state                            |
| ETV6     | Thrombocytopenia 5                                                                          | Prothrombotic state                            |
| SERPIND1 | Thrombophilia due to heparin cofactor II deficiency                                         | Prothrombotic state                            |
| SERPINC1 | Thrombophilia due to antithrombin III deficiency                                            | Prothrombotic state                            |
| PROS1    | Thrombophilia due to protein S deficiency                                                   | Prothrombotic state                            |
| PROC     | Thrombophilia due to protein C deficiency, autos                                            | Prothrombotic state                            |
| STIM1    | Stormorken syndrome                                                                         | Prothrombotic state                            |
| NOTCH3   | CADASIL                                                                                     | Small vessel disease                           |
| HTRA1    | HTRA1-autosomal dominant disease                                                            | Small vessel disease                           |
| COL4A2   | Brain small vessel disease 2                                                                | Small vessel disease                           |
| COL4A1   | Brain small vessel disease with or without ocular anomalies/PADMAL                          | Small vessel disease                           |
| TREX1    | Vasculopathy, retinal, with cerebral leukoencephalopathy and systemic manifestations/RVCL-S | Small vessel disease                           |
| GSN      | Amyloidosis, Finnish type                                                                   | Small vessel disease                           |
| TTR      | Amyloidosis, hereditary, transthyretin-related                                              | Small vessel disease                           |
| PRNP     | Cerebral amyloid angiopathy, PRNP-related                                                   | Small vessel disease                           |
| PSEN1    | Alzheimer's disease                                                                         | Small vessel disease                           |
| GLA      | Fabry Disease                                                                               | Other disease (small and large artery disease) |
| NF1      | Neurofibromatosis 1                                                                         | Other disease (small and large artery disease) |
| ABCC6    | Pseudoxanthoma elasticum                                                                    | Other disease                                  |

eTable 1 Continued

| Gene   | Phenotype                                                                      | Etiology of stroke                               |
|--------|--------------------------------------------------------------------------------|--------------------------------------------------|
|        |                                                                                | (small and large artery disease)                 |
| PKD1   | Polycystic kidney disease 1                                                    | Other disease<br>(Cerebrovascular malformations) |
| PKD2   | Polycystic kidney disease 2                                                    | Other disease<br>(Cerebrovascular malformations) |
| KRIT1  | Cerebral cavernous malformations-1                                             | Other disease<br>(Cerebrovascular malformations) |
| ACVRL1 | Telangiectasia, hereditary hemorrhagic, type 2                                 | Other disease<br>(Cerebrovascular malformations) |
| ENG    | Telangiectasia, hereditary hemorrhagic, type 1                                 | Other disease<br>(Cerebrovascular malformations) |
| FLCN   | Birt-Hogg-Dube syndrome                                                        | Other disease<br>(Unknown mechanism)             |
| DYRK1B | Abdominal obesity-metabolic syndrome 3                                         | Other disease<br>(Unknown mechanism)             |
| PDE4D  | Acrodysostosis 2, with or without hormone resistance                           | Other disease<br>(Unknown mechanism)             |
| APOA1  | Amyloidosis, 3 or more types                                                   | Other disease<br>(Unknown mechanism)             |
| VHL    | Pheochromocytoma                                                               | Other disease<br>(Unknown mechanism)             |
| RET    | Medullary thyroid carcinoma or Pheochromocytoma                                | Other disease<br>(Unknown mechanism)             |
| BMPR2  | Pulmonary hypertension, primary                                                | Other disease<br>(Unknown mechanism)             |
| CBL    | Noonan syndrome-like disorder with or without juvenile myelomonocytic leukemia | Other disease<br>(Unknown mechanism)             |
| KIF1B  | Pheochromocytoma                                                               | Other disease<br>(Unknown mechanism)             |
| TGIF1  | Holoprosencephaly 4                                                            | Other disease<br>(Unknown mechanism)             |

**eTable 2 List of the 181 genes associated with Mendelian-stroke in custom-designed panel**

| Gene       | Location     | OMIM ID | Inheritance | Associated Mendelian Disorder                                                                                                                                                                                     |
|------------|--------------|---------|-------------|-------------------------------------------------------------------------------------------------------------------------------------------------------------------------------------------------------------------|
| ABCA1      | 9q31.1       | 600046  | AR          | Tangier disease                                                                                                                                                                                                   |
| ABCC6      | 16p13.11     | 603234  | AR          | Arterial calcification, generalized, of infancy, 2; Pseudoxanthoma elasticum                                                                                                                                      |
| ACTA2      | 10q23.31     | 102620  | AD          | Moyamoya disease 5; Aortic aneurysm, familial thoracic 6; Multisystemic smooth muscle dysfunction syndrome                                                                                                        |
| ACTC1      | 15q14        | 102540  | AD          | Atrial septal defect 5; Cardiomyopathy, dilated, 1R; Cardiomyopathy, hypertrophic, 11; Left ventricular noncompaction 4                                                                                           |
| ACTN2      | 1q43         | 102573  | AD          | Cardiomyopathy, dilated, 1AA, with or without LVNC; Cardiomyopathy, hypertrophic, 23, with or without LVNC; Myopathy, congenital with structured cores and Z-line abnormalities; Myopathy, distal, 6, adult onset |
| ACVRL1     | 12q13.13     | 601284  | AD          | Telangiectasia, hereditary hemorrhagic, type 2                                                                                                                                                                    |
| ANK2       | 4q25-q26     | 106410  | AD          | Cardiac arrhythmia, ankyrin-B-related; Long QT syndrome 4                                                                                                                                                         |
| APOA1      | 11q23.3      | 107680  | AD          | Amyloidosis, 3 or more types                                                                                                                                                                                      |
| APOA5      | 11q23.3      | 606368  | AD          | Hyperchylomicronemia, late-onset                                                                                                                                                                                  |
| APP        | 21q21.3      | 104760  | AD          | Alzheimer disease 1, familial; Cerebral amyloid angiopathy, Dutch, Italian, Iowa, Flemish, Arctic variants                                                                                                        |
| ATP7A      | Xq21.1       | 300011  | XLR         | Menkes disease; Occipital horn syndrome; Spinal muscular atrophy, distal, X-linked 3                                                                                                                              |
| B4GALT1    | 9p21.1       | 137060  | AR          | Congenital disorder of glycosylation, type II d                                                                                                                                                                   |
| BAG3       | 10q26.11     | 603883  | AD          | Cardiomyopathy, dilated, 1HH                                                                                                                                                                                      |
| BMPR2      | 2q33.1-q33.2 | 600799  | AD          | Pulmonary hypertension, familial primary, 1, with or without HHT; Pulmonary hypertension, primary, fenfluramine or dexfenfluramine-associated; Pulmonary venoocclusive disease 1                                  |
| BRCC3      | Xq28         | 300617  | XLR         | Moyamoya 4 X-link                                                                                                                                                                                                 |
| CBL        | 11q23.3      | 165360  | AD          | juvenile myelomonocytic leukemia and Noonan syndrome-like disorder                                                                                                                                                |
| CBS        | 21q22.3      | 613381  | AR          | Homocystinuria, B6-responsive and nonresponsive types; Thrombosis, hyperhomocysteinemic                                                                                                                           |
| CCER2      | 19q13.2      | 617634  | AD          | Moyamoya disease, susceptibility to                                                                                                                                                                               |
| CCM2       | 7p13         | 607929  | AD          | Cerebral cavernous malformations 2                                                                                                                                                                                |
| CDKN1C     | 11p15.4      | 600856  | AD          | Beckwith-Wiedemann syndrome; IMAGE syndrome                                                                                                                                                                       |
| CECR1/ADA2 | 22q11.1      | 615688  | AR          | Vasculitis, autoinflammation, immunodeficiency, and hematologic defects syndrome                                                                                                                                  |
| CEP19      | 3q29         | 615586  | AR          | Morbid Obesity And Spermatogenic Failure                                                                                                                                                                          |
| CETP       | 16q13        | 118470  | AD          | Hyperalphalipoproteinemia; High density lipoprotein cholesterol level QTL 10                                                                                                                                      |
| COL1A1     | 17q21.33     | 120150  | AD          | Combined osteogenesis imperfecta and Ehlers-Danlos syndrome 1                                                                                                                                                     |

eTable2 Continued

| Gene    | Location     | OMIM ID | Inheritance | Associated Mendelian Disorder                                                                                                                                                                                                         |
|---------|--------------|---------|-------------|---------------------------------------------------------------------------------------------------------------------------------------------------------------------------------------------------------------------------------------|
| COL1A2  | 7q21.3       | 120160  | AD          | Combined osteogenesis imperfecta and Ehlers-Danlos syndrome 2                                                                                                                                                                         |
| COL3A1  | 2q32.2       | 120180  | AD, AR      | Ehlers-Danlos syndrome, vascular type; Polymicrogyria with or without vascular-type EDS                                                                                                                                               |
| COL4A1  | 13q34        | 120130  | AD          | Angiopathy, hereditary, with nephropathy, aneurysms, and muscle cramps; Brain small vessel disease with or without ocular anomalies; Anterior segment dysgenesis with cerebral involvement; Porencephaly 1; Retinal artery tortuosity |
| COL4A2  | 13q34        | 120090  | AD          | Brain small vessel disease 2                                                                                                                                                                                                          |
| COL5A1  | 9q34.3       | 120215  | AD          | Ehlers-Danlos syndrome, classic type, 1; Fibromuscular dysplasia, multifocal                                                                                                                                                          |
| CPT2    | 1p32.3       | 600650  | AR          | CPT II deficiency                                                                                                                                                                                                                     |
| CST3    | 20p11.21     | 604312  | AD          | Cerebral amyloid angiopathy                                                                                                                                                                                                           |
| CTC1    | 17p13.1      | 613129  | AR          | Cerebroretinal Microangiopathy With Calcifications And Cysts                                                                                                                                                                          |
| CTSA    | 20q13.12     | 613111  | AR          | Galactosialidosis                                                                                                                                                                                                                     |
| CYP27A1 | 2q35         | 606530  | AR          | Cerebrotendinous xanthomatosis                                                                                                                                                                                                        |
| DES     | 2q35         | 125660  | AD          | Cardiomyopathy, dilated, 11; Scapuloperoneal syndrome, neurogenic, Kaeser type                                                                                                                                                        |
| DOCK8   | 9p24.3       | 611432  | AR          | Hyper-IgE recurrent infection syndrome, autosomal recessive                                                                                                                                                                           |
| DSG2    | 18q12.1      | 125671  | AD          | Arrhythmogenic right ventricular dysplasia, familial, 10                                                                                                                                                                              |
| DYRK1B  | 19q13.2      | 604556  | AD          | Abdominal obesity-metabolic syndrome 3                                                                                                                                                                                                |
| ELN     | 7q11.23      | 130160  | AD          | Cutis laxa, autosomal dominant; Supravalvar aortic stenosis                                                                                                                                                                           |
| ENG     | 9q34.11      | 131195  | AD          | Hereditary hemorrhagic telangiectasia, type 1                                                                                                                                                                                         |
| ENPP1   | 6q23.2       | 173335  | AD, AR      | Arterial calcification, generalized, of infancy, 1; Cole disease                                                                                                                                                                      |
| EPHX2   | 8p21.2-p21.1 | 132811  | AD, AR      | Hypercholesterolemia, familial, due to LDLR defect, modifier of                                                                                                                                                                       |
| ETV6    | 12p13.2      | 600618  | AD          | Thrombocytopenia 5                                                                                                                                                                                                                    |
| F10     | 13q34        | 613872  | AR          | Factor X Deficiency                                                                                                                                                                                                                   |
| F13A1   | 6p25.1       | 134570  | AR          | Factor XIII Subunit A Deficiency                                                                                                                                                                                                      |
| F13B    | 1q31.3       | 134580  | AR          | Factor XIII Subunit B Deficiency                                                                                                                                                                                                      |
| F2      | 11p11.2      | 176930  | AD, AR      | Dysprothrombinemia; Hypoprothrombinemia; Thrombophilia due to thrombin defect;                                                                                                                                                        |
| F3      | 1p21.3       | 134390  | NA          | NA                                                                                                                                                                                                                                    |
| F5      | 1q24.2       | 612309  | AD, AR      | Factor V deficiency; Thrombophilia due to activated protein C resistance; Thrombophilia, susceptibility to, due to factor V Leiden                                                                                                    |
| F7      | 13q34        | 613878  | AR          | Factor VII Deficiency                                                                                                                                                                                                                 |
| F8      | Xq28         | 300841  | XLR         | Hemophilia A                                                                                                                                                                                                                          |
| FBN1    | 15q21.1      | 134797  | AD          | Marfan syndrome                                                                                                                                                                                                                       |
| FGA     | 4q31.3       | 134820  | AD, AR      | Congenital Afibrinogenemia; Amyloidosis, familial visceral                                                                                                                                                                            |
| FGB     | 4q31.3       | 134830  | AR          | Congenital Afibrinogenemia                                                                                                                                                                                                            |
| FGG     | 4q32.1       | 134850  | AR          | Congenital Afibrinogenemia                                                                                                                                                                                                            |
| FLCN    | 17p11.2      | 607273  | AD          | Birt-Hogg-Dube syndrome; Pneumothorax, primary spontaneous                                                                                                                                                                            |

eTable2 Continued

| Gene    | Location      | OMIM ID | Inheritance | Associated Mendelian Disorder                                                                                                                                                                               |
|---------|---------------|---------|-------------|-------------------------------------------------------------------------------------------------------------------------------------------------------------------------------------------------------------|
| GATA4   | 8p23.1        | 600576  | AD          | Atrial Septal Defect 2; Tetralogy of Fallot                                                                                                                                                                 |
| GATA6   | 18q11.2       | 601656  | AD          | Atrial Septal Defect 9; Tetralogy of Fallot                                                                                                                                                                 |
| GATAD1  | 7q21.2        | 614518  | AR          | Cardiomyopathy, dilated, 2B                                                                                                                                                                                 |
| GDF1    | 19p13.11      | 602880  | AD          | Congenital heart defects, multiple types, 6                                                                                                                                                                 |
| GDF2    | 10q11.22      | 605120  | AD          | Hereditary hemorrhagic telangiectasia, type 5                                                                                                                                                               |
| GGCX    | 2p11.2        | 137167  | AR          | Vitamin K-Dependent Clotting Factors, Combined Deficiency of, 1                                                                                                                                             |
| GJA1    | 6q22.31       | 121014  | AD          | Atrioventricular septal defect 3                                                                                                                                                                            |
| GJA5    | 1q21.2        | 121013  | AD          | Atrial fibrillation, familial, 11                                                                                                                                                                           |
| GLA     | Xq22.1        | 300644  | XL          | Fabry disease; Fabry disease, cardiac variant                                                                                                                                                               |
| GPIBA   | 17p13.2       | 606672  | AD, AR      | Bernard-Soulier syndrome, type A2; von Willebrand disease, platelet-type                                                                                                                                    |
| GP6     | 19q13.42      | 605546  | AR          | Bleeding Disorder Platelet Type 11                                                                                                                                                                          |
| GSN     | 9q33.2        | 137350  | AD          | Amyloidosis, Finnish type                                                                                                                                                                                   |
| GUCY1A3 | 4q32.1        | 139396  | AR          | Moyamoya 6 with achalasia                                                                                                                                                                                   |
| HBB     | 11p15.4       | 141900  | AR          | Sickle cell anemia                                                                                                                                                                                          |
| HTRA1   | 10q26.13      | 602194  | AD, AR      | Cerebral autosomal recessive arteriopathy with subcortical infarcts and leukoencephalopathy (CARASIL); Cerebral arteriopathy, autosomal dominant, with subcortical infarcts and leukoencephalopathy, type 2 |
| ITGA2   | 5q11.2        | 192974  | NA          | platelet disorder                                                                                                                                                                                           |
| ITGA2B  | 17q21.31      | 607759  | AD, AR      | Bleeding Disorder Platelet Type 16; Glanzmann thrombasthenia 1                                                                                                                                              |
| ITGB3   | 17q21.32      | 173470  | AD, AR      | Bleeding disorder, platelet-type, 24, autosomal dominant; Glanzmann thrombasthenia 2                                                                                                                        |
| ITM2B   | 13q14.2       | 603904  | AD          | Retinal dystrophy with inner retinal dysfunction and ganglion cell abnormalities; Dementia                                                                                                                  |
| ITPKC   | 19q13.2       | 606476  |             | Kawasaki disease, associated                                                                                                                                                                                |
| JAG1    | 20p12.2       | 601920  | AD          | Tetralogy of Fallot; Alagille syndrome 1                                                                                                                                                                    |
| JAK2    | 9p24.1        | 147796  | AD          | Thrombocythemia 3                                                                                                                                                                                           |
| KCNA5   | 12p13.32      | 176267  | AD          | Familial Atrial Fibrillation 7                                                                                                                                                                              |
| KCNE1   | 21q22.12      | 176261  | AD, AR      | Long QT syndrome 5; Jervell and Lange-Nielsen syndrome 2                                                                                                                                                    |
| KCNE2   | 21q22.11      | 603796  | AD          | Familial Atrial Fibrillation 4; Long QT syndrome 6                                                                                                                                                          |
| KCNH2   | 7q36.1        | 152427  | AD          | Long QT syndrome 2; Short QT syndrome 1                                                                                                                                                                     |
| KCNJ2   | 17q24.3       | 600681  | AD          | Familial Atrial Fibrillation 9; Short QT syndrome 3; Andersen syndrome                                                                                                                                      |
| KCNJ5   | 11q24.3       | 600734  | AD          | Long QT syndrome 13; Hyperaldosteronism, familial, type III                                                                                                                                                 |
| KCNQ1   | 11p15.5-p15.4 | 607542  | AD          | Atrial fibrillation, familial 3; Long QT syndrome 1; Short QT syndrome 2                                                                                                                                    |
| KIF1B   | 1p36.22       | 605995  | AD          | Pheochromocytoma; Charcot-Marie-Tooth disease, type 2A1                                                                                                                                                     |
| KRAS    | 12p12.1       | 190070  | AD          | Arteriovenous malformation of the brain, somatic; Cardiofaciocutaneous syndrome 2; Noonan syndrome 3; RAS-associated autoimmune leukoproliferative disorder                                                 |
| KRIT1   | 7q21.2        | 604214  | AD          | Cerebral cavernous malformations 1                                                                                                                                                                          |
| LAMP2   | Xq24          | 309060  | XLD         | Danon disease                                                                                                                                                                                               |
| LDLR    | 19p13.2       | 606945  | AD, AR      | Hypercholesterolemia, familial                                                                                                                                                                              |

eTable2 Continued

| Gene    | Location     | OMIM ID | Inheritance | Associated Mendelian Disorder                                                                                                             |
|---------|--------------|---------|-------------|-------------------------------------------------------------------------------------------------------------------------------------------|
| LIPC    | 15q21.3      | 151670  | AR          | High density lipoprotein cholesterol level QTL 12; Hepatic lipase deficiency                                                              |
| LMBRD1  | 6q13         | 612625  | AR          | Methylmalonic aciduria and homocystinuria, cblF type                                                                                      |
| LMNA    | 1q22         | 150330  | AD,<br>AR   | Charcot-Marie-Tooth disease, type 2B1; Cardiomyopathy, dilated, 1A                                                                        |
| LPL     | 8p21.3       | 609708  | AD,<br>AR   | Hepatic Lipase Deficiency; Combined hyperlipidemia, familial; High density lipoprotein cholesterol level QTL 11                           |
| MFAP5   | 12p13.31     | 601103  | AD          | Aortic aneurysm, familial thoracic 9                                                                                                      |
| MMACHC  | 1p34.1       | 609831  | AR          | Methylmalonic aciduria and homocystinuria, cblC type                                                                                      |
| MPL     | 1p34.2       | 159530  | AD,<br>AR   | Thrombocythemia 2; Thrombocytopenia, congenital amegakaryocytic                                                                           |
| MTCP1   | Xq28         | 300116  | XLR         | Moyamoya disease                                                                                                                          |
| MTHFR   | 1p36.22      | 607093  | AR          | Homocystinuria due to MTHFR deficiency                                                                                                    |
| MTR     | 1q43         | 156570  | AR          | Homocystinuria-megaloblastic anemia, cblG complementation type                                                                            |
| MTRR    | 5p15.31      | 602568  | AR          | Homocystinuria-megaloblastic anemia, cbl E type                                                                                           |
| MTTP    | 4q23         | 157147  | AD,<br>AR   | Abdominal obesity-metabolic syndrome 1; Abetalipoproteinemia                                                                              |
| MMUT    | 6p12.3       | 609058  | AR          | Methylmalonic aciduria, mut (0) type                                                                                                      |
| MYBPC3  | 11p11.2      | 600958  | AD          | Cardiomyopathy, hypertrophic, 4; Cardiomyopathy, dilated, 1MM; Left ventricular noncompaction 10                                          |
| MYH11   | 16p13.11     | 160745  | AD          | Aortic aneurysm, familial thoracic 4                                                                                                      |
| MYH9    | 22q12.3      | 160775  | AD          | Macrothrombocytopenia and granulocyte inclusions with or without nephritis or sensorineural hearing loss; Deafness, autosomal dominant 17 |
| MYLK    | 3q21.1       | 600922  | AD          | Aortic aneurysm, familial thoracic 7                                                                                                      |
| NF1     | 17q11.2      | 613113  | AD          | Neurofibromatosis, type 1                                                                                                                 |
| NKX2-5  | 5q35.1       | 600584  | AD          | Atrial Septal Defect 7, with or without AV Conduction Defects; Tetralogy of Fallot                                                        |
| NOS3    | 7q36.1       | 163729  | AD          | Alzheimer disease, type 1                                                                                                                 |
| NOTCH3  | 19p13.12     | 600276  | AD          | Cerebral arteriopathy with subcortical infarcts and leukoencephalopathy (CADASIL1)                                                        |
| NPPA    | 1p36.22      | 108780  | AD          | Familial Atrial Fibrillation 6                                                                                                            |
| NUP155  | 5p13.2       | 606694  | AR          | Familial Atrial Fibrillation 15                                                                                                           |
| P2RY12  | 3q25.1       | 600515  | AR          | Bleeding Disorder Platelet Type 8                                                                                                         |
| PCNT    | 21q22.3      | 605925  | AR          | Microcephalic osteodysplastic primordial dwarfism, type II                                                                                |
| PDCD10  | 3q26.1       | 609118  | AD          | Cerebral cavernous malformations 3                                                                                                        |
| PDE4D   | 5q11.2-q12.1 | 600129  | AD          | Acrodysostosis 2, with or without hormone resistance                                                                                      |
| PGM1    | 1p31.3       | 171900  | AR          | Congenital disorder of glycosylation, type It                                                                                             |
| PHACTR1 | 6p24.1       | 608723  | AD          | Spontaneous Bilateral Cervical Internal Carotid and Vertebral Artery Dissection                                                           |
| PIGA    | Xp22.2       | 311770  | XLR         | Multiple congenital anomalies-hypotonia-seizures syndrome 2                                                                               |
| PITX2   | 4q25         | 601542  | AD          | Axenfeld-Rieger syndrome, type 1                                                                                                          |
| PKD1    | 16p13.3      | 601313  | AD          | Polycystic kidney disease 1                                                                                                               |

eTable2 Continued

| Gene     | Location      | OMIM ID | Inheritance | Associated Mendelian Disorder                                                                                                                                                                                         |
|----------|---------------|---------|-------------|-----------------------------------------------------------------------------------------------------------------------------------------------------------------------------------------------------------------------|
| PKD2     | 4q22.1        | 173910  | AD          | Polycystic kidney disease 2                                                                                                                                                                                           |
| PLA2G7   | 6p12.3        | 601690  | AR          | Platelet-Activating Factor Acetylhydrolase Deficiency                                                                                                                                                                 |
| PLAU     | 10q22.2       | 191840  | AD          | Quebec Platelet Disorder                                                                                                                                                                                              |
| PLOD3    | 7q22.1        | 603066  | AR          | Lysyl hydroxylase 3 deficiency                                                                                                                                                                                        |
| PNP      | 14q11.2       | 164050  | AR          | Immunodeficiency due to purine nucleoside phosphorylase deficiency                                                                                                                                                    |
| POLD1    | 19q13.33      | 174761  | AD          | Mandibular Hypoplasia, Deafness, Progeroid Features, And Lipodystrophy syndrome                                                                                                                                       |
| PRKAG2   | 7q36.1        | 602743  | AD          | Cardiomyopathy, hypertrophic 6;Glycogen storage disease of heart, lethal congenital; Wolff-Parkinson-White syndrome                                                                                                   |
| PRKAR1A  | 17q24.2       | 188830  | AD          | Carney complex, type 1                                                                                                                                                                                                |
| PRKG1    | 10q11.2-q21.1 | 176894  | AD          | Aortic aneurysm, familial thoracic 8                                                                                                                                                                                  |
| PRNP     | 20p13         | 176640  | AD          | Cerebral amyloid angiopathy, PRNP-related                                                                                                                                                                             |
| PROC     | 2q14.3        | 612283  | AD, AR      | Thrombophilia due to protein C deficiency                                                                                                                                                                             |
| PROS1    | 3q11.1        | 176880  | AD, AR      | Thrombophilia due to protein S deficiency                                                                                                                                                                             |
| PROZ     | 13q34         | 176895  | NA          | deep venous thrombotic disease, associated                                                                                                                                                                            |
| PSEN1    | 14q24.2       | 104311  | AD          | Cardiomyopathy, dilated, 1U;Alzheimer disease, type 3                                                                                                                                                                 |
| PSEN2    | 1q42.13       | 600759  | AD          | Cardiomyopathy, dilated, 1V;Alzheimer disease-4                                                                                                                                                                       |
| RASA1    | 5q14.3        | 139150  | AD          | Capillary malformation-arteriovenous malformation                                                                                                                                                                     |
| RBM20    | 10q25.2       | 613171  | AD          | Cardiomyopathy, dilated, 1DD                                                                                                                                                                                          |
| RET      | 10q11.21      | 164761  | AD          | Pheochromocytoma                                                                                                                                                                                                      |
| RNF213   | 17q25.3       | 613768  | AD, AR      | Moyamoya disease 2, susceptibility to                                                                                                                                                                                 |
| RYR1     | 19q13.2       | 180901  | AD, AR      | Central core disease                                                                                                                                                                                                  |
| RYR2     | 1q43          | 180902  | AD          | Arrhythmogenic Right Ventricular Dysplasia/Cardiomyopathy 2; Ventricular arrhythmias due to cardiac ryanodine receptor calcium release deficiency syndrome; Ventricular tachycardia, catecholaminergic polymorphic, 1 |
| SCN1B    | 19q13.11      | 600235  | AD          | Atrial fibrillation, familial, 13                                                                                                                                                                                     |
| SCN2B    | 11q23.3       | 601327  | AD          | Atrial fibrillation, familial, 14                                                                                                                                                                                     |
| SCN3B    | 11q24.1       | 608214  | AD          | Atrial fibrillation, familial, 16;Brugada syndrome 7                                                                                                                                                                  |
| SCN4B    | 11q23.3       | 608256  | AD          | Atrial fibrillation, familial,17; Long QT syndrome 10                                                                                                                                                                 |
| SCN5A    | 3p22.2        | 600163  | AD          | Atrial fibrillation, familial, 10; Brugada syndrome 1; Cardiomyopathy, dilated, 1E                                                                                                                                    |
| SERPINC1 | 1q25.1        | 107300  | AD, AR      | Thrombophilia due to antithrombin III deficiency                                                                                                                                                                      |
| SERPIND1 | 22q11.21      | 142360  | AD          | Thrombophilia due to heparin cofactor II deficiency                                                                                                                                                                   |
| SHOC2    | 10q25.2       | 602775  | AD          | Noonan-like syndrome and moyamoya disease                                                                                                                                                                             |
| SLC19A2  | 1q24.2        | 603941  | AR          | Thiamine-Responsive Megaloblastic Anemia Syndrome                                                                                                                                                                     |



eTable2 Continued

| Gene     | Location | OMIM ID | Inheritance | Associated Mendelian Disorder                                                        |
|----------|----------|---------|-------------|--------------------------------------------------------------------------------------|
| SLC2A10  | 20q13.12 | 606145  | AR          | Arterial tortuosity syndrome                                                         |
| SMAD3    | 15q22.33 | 603109  | AD          | Loeys-Dietz syndrome, type 3                                                         |
| SMAD4    | 18q21.2  | 600993  | AD          | Juvenile polyposis/hereditary hemorrhagic telangiectasia syndrome                    |
| SMARCAL1 | 2q35     | 606622  | AR          | Schimke immunoosseous dysplasia                                                      |
| STIM1    | 11p15.4  | 605921  | AD,<br>AR   | ;Immunodeficiency 10                                                                 |
| TALDO1   | 11p15.5  | 602063  | AR          | Transaldolase deficiency                                                             |
| TAZ      | Xq28     | 300394  | XLR         | 3-Methylglutaconic aciduria, type II (Barth syndrome)                                |
| TBX1     | 22q11.21 | 602054  | AD          | Tetralogy of Fallot                                                                  |
| TBX20    | 7p14.2   | 606061  | AD          | Atrial septal defect 4                                                               |
| TBXA2R   | 19p13.3  | 188070  | AD          | Bleeding disorder, platelet-type, 13, susceptibility to                              |
| TCAP     | 17q12    | 604488  | AD          | Cardiomyopathy, hypertrophic, 25                                                     |
| TCN1     | 11q12.1  | 189905  | NA          | NA                                                                                   |
| TGFB2    | 1q41     | 190220  | AD          | Loeys-Dietz syndrome, type 4                                                         |
| TGFB3    | 14q24.3  | 190230  | AD          | Arrhythmogenic right ventricular dysplasia 1;Loeys-Dietz syndrome 5                  |
| TGFBR1   | 9q22.33  | 190181  | AD          | Loeys-Dietz syndrome, type 1A; Loeys-Dietz syndrome, type 2A                         |
| TGFBR2   | 3p24.1   | 190182  | AD          | Loeys-Dietz syndrome 2                                                               |
| TGIF1    | 18p11.31 | 602630  | AD          | Holoprosencephaly 4                                                                  |
| THBD     | 20p11.21 | 188040  | AD          | Thrombophilia Due To Thrombomodulin Defect                                           |
| TLL1     | 4q32.3   | 606742  | AD          | Atrial septal defect 6                                                               |
| TMEM173  | 5q31.2   | 612374  | AD          | STING-associated vasculopathy, infantile-onset                                       |
| TREX1    | 3p21.31  | 606609  | AD          | Vasculopathy, retinal, with cerebral leukodystrophy                                  |
| TTN      | 2q31.2   | 188840  | AD          | Cardiomyopathy, dilated, 1G                                                          |
| TTR      | 18q12.1  | 176300  | AD          | Amyloidosis, hereditary, transthyretin-related                                       |
| VHL      | 3p25.3   | 608537  | AD          | von Hippel-Lindau syndrome                                                           |
| VKORC1   | 16p11.2  | 608547  | AD          | Vitamin K-Dependent Clotting Factors, Combined Deficiency of, 2; Warfarin resistance |
| VWF      | 12p13.31 | 613160  | AD,<br>AR   | Von Willebrand Disease                                                               |
| YY1AP1   | 1q22     | 607860  | AR          | Grange syndrome                                                                      |
| ZFPM2    | 8q23.1   | 603693  | AD          | Tetralogy of Fallot                                                                  |



**eTable 3 Diagnoses of 759 individuals with 1 P/LP variant at risk for one monogenic diseases**

| Code_n     | Gender | Age | Gene  | Phenotype                   | Etiology of stroke | Mutation                          | Clinvar | ACMG | Definite | Possible | Undetermined | Insufficient Information |
|------------|--------|-----|-------|-----------------------------|--------------------|-----------------------------------|---------|------|----------|----------|--------------|--------------------------|
| CNSR300069 | F      | 58  | ACTC1 | Hereditary cardiomyopathies | Embolic stroke     | NM_005159:exon3:c.T213A:p.Y71X    | NA      | P    |          |          | Y            |                          |
| CNSR302746 | F      | 71  | ACTC1 | Hereditary cardiomyopathies | Embolic stroke     | NM_005159:exon7:c.G1093A:p.D365N  | NA      | LP   |          |          | Y            |                          |
| CNSR301704 | M      | 55  | ACTN2 | Hereditary cardiomyopathies | Embolic stroke     | NM_001103:exon16:c.G1919A:p.R640H | LP      | VUS  |          |          | Y            |                          |
| CNSR305213 | M      | 63  | ACTN2 | Hereditary cardiomyopathies | Embolic stroke     | NM_001103:exon16:c.G1919A:p.R640H | LP      | VUS  |          |          |              | Y                        |
| CNSR308476 | F      | 64  | ACTN2 | Hereditary cardiomyopathies | Embolic stroke     | NM_001103:exon14:c.C1618T:p.Q540X | NA      | P    |          |          | Y            |                          |
| CNSR303363 | M      | 63  | BAG3  | Hereditary cardiomyopathies | Embolic stroke     | NM_004281:exon2:c.181-1G>A        | NA      | P    |          |          | Y            |                          |
| CNSR309438 | M      | 52  | DSG2  | Hereditary cardiomyopathies | Embolic stroke     | NM_001943:exon10:c.G1311A:p.W437X | NA      | P    |          |          | Y            |                          |
| CNSR300880 | M      | 51  | GATA4 | Tetralogy of Fallot         | Embolic stroke     | NM_002052.5(GATA4):c.997+103G>T   | P       | VUS  |          |          | Y            |                          |
| CNSR302453 | M      | 84  | GATA4 | Tetralogy of Fallot         | Embolic stroke     | NM_002052:exon6:c.G1075A:p.E359K  | P       | VUS  |          |          | Y            |                          |
| CNSR302668 | F      | 80  | GATA4 | Tetralogy of Fallot         | Embolic stroke     | NM_002052:exon6:c.G1075A:p.E359K  | P       | VUS  |          |          | Y            |                          |
| CNSR302724 | F      | 53  | GATA4 | Tetralogy of Fallot         | Embolic stroke     | NM_002052:c.997+103G>T            | P       | VUS  |          |          | Y            |                          |
| CNSR302956 | M      | 53  | GATA4 | Tetralogy of Fallot         | Embolic stroke     | NM_002052:exon7:c.C1325T:p.A442V  | P       | VUS  |          |          | Y            |                          |

eTable 3 Continued

| Code_n     | Gender | Age | Gene  | Phenotype                                   | Etiology of stroke | Mutation                           | Clinvar | ACMG | Definite | Possible | Undetermined | Insufficient Information |
|------------|--------|-----|-------|---------------------------------------------|--------------------|------------------------------------|---------|------|----------|----------|--------------|--------------------------|
| CNSR303353 | M      | 53  | GATA4 | Tetralogy of Fallot                         | Embolic stroke     | NM_002052:exon5:c.C946G;p.Q316E    | P       | VUS  |          |          | Y            |                          |
| CNSR303946 | M      | 41  | GATA4 | Tetralogy of Fallot                         | Embolic stroke     | NM_002052:exon6:c.G1075A;p.E359K   | P       | VUS  |          |          | Y            |                          |
| CNSR305783 | M      | 60  | GATA4 | Tetralogy of Fallot                         | Embolic stroke     | NM_002052:c.997+103G>T             | P       | VUS  |          |          | Y            |                          |
| CNSR306009 | M      | 77  | GATA4 | Tetralogy of Fallot                         | Embolic stroke     | NM_002052:c.997+103G>T             | P       | VUS  |          |          | Y            |                          |
| CNSR309014 | M      | 70  | GATA4 | Tetralogy of Fallot                         | Embolic stroke     | NM_002052:exon7:c.C1325T;p.A442V   | P       | VUS  |          |          | Y            |                          |
| CNSR309505 | M      | 74  | GATA4 | Tetralogy of Fallot                         | Embolic stroke     | NM_002052:exon7:c.C1325T;p.A442V   | P       | VUS  |          |          | Y            |                          |
| CNSR309956 | M      | 51  | GATA4 | Tetralogy of Fallot                         | Embolic stroke     | NM_002052:exon3:c.777delC;p.R260fs | NA      | LP   |          |          | Y            |                          |
| CNSR309997 | M      | 46  | GATA4 | Tetralogy of Fallot                         | Embolic stroke     | NM_002052:c.997+103G>T             | P       | VUS  |          |          | Y            |                          |
| CNSR304597 | M      | 47  | GDF1  | Congenital heart defects, multiple types, 6 | Embolic stroke     | NM_001492:exon7:c.159delC;p.P53fs  | NA      | LP   |          |          | Y            |                          |
| CNSR306192 | M      | 71  | GDF1  | Congenital heart defects, multiple types, 6 | Embolic stroke     | NM_001492:exon7:c.289dupG;p.V97fs  | NA      | LP   |          |          | Y            |                          |
| CNSR307760 | F      | 72  | GDF1  | Congenital heart defects, multiple types, 6 | Embolic stroke     | NM_001492:exon7:c.C262T;p.Q88X     | NA      | P    |          |          | Y            |                          |
| CNSR300610 | F      | 72  | GJA1  | Atrioventricular septal defect 3            | Embolic stroke     | NM_000165:exon2:c.A305T;p.K102M    | NA      | LP   |          |          | Y            |                          |
| CNSR304700 | F      | 45  | GJA1  | Atrioventricular septal defect 3            | Embolic stroke     | NM_000165:exon2:c.A305T;p.K102M    | NA      | LP   |          |          | Y            |                          |
| CNSR305166 | F      | 77  | GJA1  | Atrioventricular septal defect 3            | Embolic stroke     | NM_000165:exon2:c.G913C;p.A305P    | NA      | LP   |          |          | Y            |                          |

eTable 3 Continued

| Code_n     | Gender | Age | Gene  | Phenotype                        | Etiology of stroke | Mutation                         | Clinvar | ACMG | Definite | Possible | Undetermined | Insufficient Information |
|------------|--------|-----|-------|----------------------------------|--------------------|----------------------------------|---------|------|----------|----------|--------------|--------------------------|
| CNSR305429 | M      | 66  | GJA1  | Atrioventricular septal defect 3 | Embolic stroke     | NM_000165:exon2:c.A305T;p.K102M  | NA      | LP   |          |          | Y            |                          |
| CNSR306575 | M      | 83  | GJA1  | Atrioventricular septal defect 3 | Embolic stroke     | NM_000165:exon2:c.A305T;p.K102M  | NA      | LP   |          |          | Y            |                          |
| CNSR310100 | M      | 76  | GJA1  | Atrioventricular septal defect 3 | Embolic stroke     | NM_000165:exon2:c.A524G;p.Y175C  | NA      | LP   |          |          | Y            |                          |
| CNSR300869 | M      | 60  | GJA5  | Hereditary cardiac dysrhythm     | Embolic stroke     | NM_005266:exon2:c.T269C;p.L90P   | NA      | LP   |          |          | Y            |                          |
| CNSR303120 | F      | 66  | GJA5  | Hereditary cardiac dysrhythm     | Embolic stroke     | NM_005266:exon2:c.T269C;p.L90P   | NA      | LP   |          |          | Y            |                          |
| CNSR303449 | M      | 74  | GJA5  | Hereditary cardiac dysrhythm     | Embolic stroke     | NM_005266:exon2:c.G1055T;p.R352M | NA      | LP   |          | Y        |              |                          |
| CNSR305175 | M      | 66  | GJA5  | Hereditary cardiac dysrhythm     | Embolic stroke     | NM_005266:exon2:c.T686C;p.L229P  | NA      | LP   |          | Y        |              |                          |
| CNSR306594 | F      | 62  | GJA5  | Hereditary cardiac dysrhythm     | Embolic stroke     | NM_005266:exon2:c.G317C;p.R106P  | NA      | LP   |          | Y        |              |                          |
| CNSR309131 | F      | 61  | GJA5  | Hereditary cardiac dysrhythm     | Embolic stroke     | NM_005266:exon2:c.G1028A;p.R343H | NA      | LP   |          |          | Y            |                          |
| CNSR309756 | M      | 64  | GJA5  | Hereditary cardiac dysrhythm     | Embolic stroke     | NM_005266:exon2:c.C316T;p.R106C  | NA      | LP   |          | Y        |              |                          |
| CNSR310261 | F      | 89  | GJA5  | Hereditary cardiac dysrhythm     | Embolic stroke     | NM_005266:exon2:c.T581C;p.V194A  | NA      | LP   |          | Y        |              |                          |
| CNSR300158 | M      | 64  | KCNA5 | Hereditary cardiac dysrhythm     | Embolic stroke     | NM_002234:exon1:c.C1727T;p.A576V | P       | VUS  |          |          | Y            |                          |
| CNSR300624 | F      | 43  | KCNA5 | Hereditary cardiac dysrhythm     | Embolic stroke     | NM_002234:exon1:c.C1727T;p.A576V | P       | VUS  |          |          | Y            |                          |
| CNSR301595 | M      | 47  | KCNA5 | Hereditary cardiac dysrhythm     | Embolic stroke     | NM_002234:exon1:c.C1727T;p.A576V | P       | VUS  |          |          | Y            |                          |
| CNSR301642 | M      | 45  | KCNA5 | Hereditary cardiac dysrhythm     | Embolic stroke     | NM_002234:exon1:c.C1727T;p.A576V | P       | VUS  |          |          | Y            |                          |

eTable 3 Continued

| Code_n     | Gender | Age | Gene  | Phenotype                    | Etiology of stroke | Mutation                         | Clinvar | ACMG | Definite | Possible | Undetermined | Insufficient Information |
|------------|--------|-----|-------|------------------------------|--------------------|----------------------------------|---------|------|----------|----------|--------------|--------------------------|
| CNSR302182 | M      | 70  | KCNA5 | Hereditary cardiac dysrhythm | Embolic stroke     | NM_002234:exon1:c.G1828A:p.E610K | P       | VUS  |          | Y        |              |                          |
| CNSR302320 | M      | 56  | KCNA5 | Hereditary cardiac dysrhythm | Embolic stroke     | NM_002234:exon1:c.C1727T:p.A576V | P       | VUS  |          |          | Y            |                          |
| CNSR302364 | F      | 79  | KCNA5 | Hereditary cardiac dysrhythm | Embolic stroke     | NM_002234:exon1:c.C1727T:p.A576V | P       | VUS  | Y        |          |              |                          |
| CNSR304681 | M      | 45  | KCNA5 | Hereditary cardiac dysrhythm | Embolic stroke     | NM_002234:exon1:c.G1828A:p.E610K | P       | VUS  |          |          | Y            |                          |
| CNSR305072 | M      | 54  | KCNA5 | Hereditary cardiac dysrhythm | Embolic stroke     | NM_002234:exon1:c.C1727T:p.A576V | P       | VUS  |          |          | Y            |                          |
| CNSR305124 | M      | 60  | KCNA5 | Hereditary cardiac dysrhythm | Embolic stroke     | NM_002234:exon1:c.C1727T:p.A576V | P       | VUS  | Y        |          |              |                          |
| CNSR307143 | M      | 59  | KCNA5 | Hereditary cardiac dysrhythm | Embolic stroke     | NM_002234:exon1:c.C1727T:p.A576V | P       | VUS  |          |          | Y            |                          |
| CNSR307545 | M      | 75  | KCNA5 | Hereditary cardiac dysrhythm | Embolic stroke     | NM_002234:exon1:c.C1727T:p.A576V | P       | VUS  |          |          | Y            |                          |
| CNSR308123 | M      | 66  | KCNA5 | Hereditary cardiac dysrhythm | Embolic stroke     | NM_002234:exon1:c.C1727T:p.A576V | P       | VUS  |          |          | Y            |                          |
| CNSR308261 | M      | 72  | KCNA5 | Hereditary cardiac dysrhythm | Embolic stroke     | NM_002234:exon1:c.G1828A:p.E610K | P       | VUS  |          |          | Y            |                          |
| CNSR303689 | M      | 47  | KCNE2 | Hereditary cardiac dysrhythm | Embolic stroke     | NM_172201:exon2:c.G205A:p.V69M   | LP      | VUS  |          |          | Y            |                          |
| CNSR304562 | M      | 66  | KCNE2 | Hereditary cardiac dysrhythm | Embolic stroke     | NM_172201:exon2:c.G205A:p.V69M   | LP      | VUS  |          | Y        |              |                          |
| CNSR305932 | F      | 53  | KCNE2 | Hereditary cardiac dysrhythm | Embolic stroke     | NM_172201:exon2:c.G205A:p.V69M   | LP      | VUS  |          | Y        |              |                          |
| CNSR303137 | M      | 61  | KCNH2 | Hereditary cardiac dysrhythm | Embolic stroke     | NM_000238:exon7:c.G1888A:p.V630I | LP      | VUS  |          |          | Y            |                          |
| CNSR303306 | M      | 53  | KCNH2 | Hereditary cardiac dysrhythm | Embolic stroke     | NM_000238:exon2:c.G121A:p.V41I   | NA      | LP   |          |          | Y            |                          |

eTable 3 Continued

| Code_n     | Gender | Age | Gene  | Phenotype                    | Etiology of stroke | Mutation                             | Clinvar | ACMG | Definite | Possible | Undetermined | Insufficient Information |
|------------|--------|-----|-------|------------------------------|--------------------|--------------------------------------|---------|------|----------|----------|--------------|--------------------------|
| CNSR305582 | F      | 68  | KCNH2 | Hereditary cardiac dysrhythm | Embolic stroke     | NM_000238:exon6:c.C1352T;p.P451L     | LP      | VUS  |          |          | Y            |                          |
| CNSR306897 | M      | 57  | KCNH2 | Hereditary cardiac dysrhythm | Embolic stroke     | NM_000238:exon2:c.G271T;p.E91X       | NA      | P    |          |          | Y            |                          |
| CNSR302460 | F      | 70  | KCNJ2 | Hereditary cardiac dysrhythm | Embolic stroke     | NM_000891:exon2:c.A971G;p.H324R      | NA      | LP   |          |          | Y            |                          |
| CNSR305866 | M      | 52  | KCNJ2 | Hereditary cardiac dysrhythm | Embolic stroke     | NM_000891:exon2:c.A593G;p.N198S      | NA      | LP   |          |          | Y            |                          |
| CNSR300301 | M      | 44  | KCNJ5 | Hereditary cardiac dysrhythm | Embolic stroke     | NM_000890:exon2:c.G862A;p.E288K      | NA      | LP   |          |          | Y            |                          |
| CNSR306658 | M      | 58  | KCNJ5 | Hereditary cardiac dysrhythm | Embolic stroke     | NM_000890:exon2:c.G532A;p.V178I      | NA      | LP   |          |          | Y            |                          |
| CNSR307982 | M      | 33  | KCNJ5 | Hereditary cardiac dysrhythm | Embolic stroke     | NM_000890:exon3:c.G1039T;p.D347Y     | NA      | LP   |          |          | Y            |                          |
| CNSR308486 | F      | 81  | KCNJ5 | Hereditary cardiac dysrhythm | Embolic stroke     | NM_000890:exon2:c.G632A;p.R211Q      | NA      | LP   |          |          | Y            |                          |
| CNSR300462 | M      | 71  | KCNQ1 | Hereditary cardiac dysrhythm | Embolic stroke     | NM_000218:exon5:c.C758G;p.S253C      | P       | VUS  | Y        |          |              |                          |
| CNSR300983 | F      | 71  | KCNQ1 | Hereditary cardiac dysrhythm | Embolic stroke     | NM_000218:exon3:c.C589T;p.P197S      | LP      | VUS  |          |          | Y            |                          |
| CNSR301428 | M      | 42  | KCNQ1 | Hereditary cardiac dysrhythm | Embolic stroke     | NM_000218:exon6:c.G911A;p.W304X      | NA      | P    |          | Y        |              |                          |
| CNSR303201 | F      | 48  | KCNQ1 | Hereditary cardiac dysrhythm | Embolic stroke     | NM_000218:exon7:c.C965T;p.T322M      | P       | VUS  |          |          | Y            |                          |
| CNSR303313 | M      | 58  | KCNQ1 | Hereditary cardiac dysrhythm | Embolic stroke     | NM_000218:exon11:c.1489dupC;p.L496fs | NA      | LP   |          |          | Y            |                          |
| CNSR303540 | F      | 54  | KCNQ1 | Hereditary cardiac dysrhythm | Embolic stroke     | NM_000218:exon15:c.C1780T;p.R594X    | P       | LP   |          | Y        |              |                          |

eTable 3 Continued

| Code_n     | Gender | Age | Gene  | Phenotype                    | Etiology of stroke | Mutation                             | Clinvar | ACMG | Definition | Possible | Undetermined | Insufficient Information |
|------------|--------|-----|-------|------------------------------|--------------------|--------------------------------------|---------|------|------------|----------|--------------|--------------------------|
| CNSR303754 | M      | 68  | KCNQ1 | Hereditary cardiac dysrhythm | Embolic stroke     | NM_000218:exon13:c.G1664A:p.R555H    | P/LP    | VUS  |            | Y        |              |                          |
| CNSR304030 | F      | 53  | KCNQ1 | Hereditary cardiac dysrhythm | Embolic stroke     | NM_000218:exon7:c.C961T:p.Q321X      | P       | P    |            |          | Y            |                          |
| CNSR304199 | M      | 71  | KCNQ1 | Hereditary cardiac dysrhythm | Embolic stroke     | NM_000218:exon13:c.C1630T:p.Q544X    | NA      | P    |            |          | Y            |                          |
| CNSR304883 | M      | 83  | KCNQ1 | Hereditary cardiac dysrhythm | Embolic stroke     | NM_000218:exon3:c.C520T:p.R174C      | P/LP    | VUS  |            |          | Y            |                          |
| CNSR305135 | F      | 59  | KCNQ1 | Hereditary cardiac dysrhythm | Embolic stroke     | NM_000218:exon16:c.1887dupC:p.G629fs | P/LP    | VUS  |            |          | Y            |                          |
| CNSR305142 | M      | 58  | KCNQ1 | Hereditary cardiac dysrhythm | Embolic stroke     | NM_000218:exon9:c.1148dupC:p.A383fs  | NA      | LP   |            |          | Y            |                          |
| CNSR305149 | F      | 78  | KCNQ1 | Hereditary cardiac dysrhythm | Embolic stroke     | NM_000218:exon13:c.C1639T:p.Q547X    | NA      | P    |            |          | Y            |                          |
| CNSR306632 | M      | 58  | KCNQ1 | Hereditary cardiac dysrhythm | Embolic stroke     | NM_000218:exon2:c.G436T:p.E146X      | NA      | P    |            |          | Y            |                          |
| CNSR306754 | F      | 60  | KCNQ1 | Hereditary cardiac dysrhythm | Embolic stroke     | NM_000218:exon4:c.C674T:p.S225L      | P/LP    | VUS  | Y          |          |              |                          |
| CNSR308491 | M      | 71  | KCNQ1 | Hereditary cardiac dysrhythm | Embolic stroke     | NM_000218:exon11:c.1445delC:p.T482fs | P       | LP   | Y          |          |              |                          |
| CNSR308806 | F      | 61  | KCNQ1 | Hereditary cardiac dysrhythm | Embolic stroke     | NM_181798:exon1:c.5dupA:p.D2fs       | NA      | LP   |            |          | Y            |                          |
| CNSR30909  | M      | 51  | KRAS  | Noonan syndrome 3            | Embolic stroke     | NM_033360:exon5:c.G463C:p.A155P      | NA      | LP   |            |          | Y            |                          |

eTable 3 Continued

| Code_n     | Gender | Age | Gene    | Phenotype                   | Etiology of stroke | Mutation                                 | Clinvar | ACMG | Definite | Possible | Undetermined | Insufficient Information |
|------------|--------|-----|---------|-----------------------------|--------------------|------------------------------------------|---------|------|----------|----------|--------------|--------------------------|
| CNSR301758 | M      | 69  | KRAS    | Noonan syndrome 3           | Embolic stroke     | NM_033360:exon5:c.T476C;p.L159S          | NA      | LP   |          |          | Y            |                          |
| CNSR303935 | F      | 62  | KRAS    | Noonan syndrome 3           | Embolic stroke     | NM_033360:exon5:c.T467C;p.F156S          | NA      | LP   |          |          | Y            |                          |
| CNSR307860 | M      | 47  | KRAS    | Noonan syndrome 3           | Embolic stroke     | NM_033360:exon5:c.T467C;p.F156S          | NA      | LP   |          |          | Y            |                          |
| CNSR300439 | M      | 66  | LMNA    | Hereditary cardiomyopathies | Embolic stroke     | NM_170707:exon6:c.G949A;p.E317K          | P/LP    | VUS  |          | Y        |              |                          |
| CNSR303884 | F      | 30  | LMNA    | Hereditary cardiomyopathies | Embolic stroke     | NM_170707:exon6:c.G1157A;p.R386K         | P       | VUS  |          |          | Y            |                          |
| CNSR306920 | F      | 69  | LMNA    | Hereditary cardiomyopathies | Embolic stroke     | NM_170707:exon11:c.G1745A;p.R582H        | P       | VUS  |          |          | Y            |                          |
| CNSR300696 | M      | 57  | MYBP C3 | Hereditary cardiomyopathies | Embolic stroke     | NM_000256:exon32:c.3628-2A>G             | NA      | P    |          |          | Y            |                          |
| CNSR301225 | M      | 59  | MYBP C3 | Hereditary cardiomyopathies | Embolic stroke     | NM_000256:exon13:c.1153_1168del;p.V385fs | P/LP    | LP   |          | Y        |              |                          |
| CNSR301773 | M      | 51  | MYBP C3 | Hereditary cardiomyopathies | Embolic stroke     | NM_000256:exon2:c.G109T;p.G37X           | NA      | P    |          | Y        |              |                          |
| CNSR301808 | M      | 68  | MYBP C3 | Hereditary cardiomyopathies | Embolic stroke     | NM_000256.3(MYBPC3):c.821+1G>A           | P       | P    |          |          | Y            |                          |
| CNSR303691 | M      | 61  | MYBP C3 | Hereditary cardiomyopathies | Embolic stroke     | NM_000256:exon31:c.3624delC;p.K1209fs    | P       | LP   |          | Y        |              |                          |
| CNSR304072 | M      | 19  | MYBP C3 | Hereditary cardiomyopathies | Embolic stroke     | NM_000256:exon22:c.2308+1G>C             | NA      | P    |          | Y        |              |                          |
| CNSR306521 | M      | 81  | MYBP C3 | Hereditary cardiomyopathies | Embolic stroke     | NM_000256:exon15:c.1377delC;p.P459fs     | P       | LP   | Y        |          |              |                          |

eTable 3 Continued

| Code_n     | Gender | Age | Gene    | Phenotype                   | Etiology of stroke | Mutation                                 | Clinvar | ACMG | Definite | Possible | Undetermined | Insufficient Information |
|------------|--------|-----|---------|-----------------------------|--------------------|------------------------------------------|---------|------|----------|----------|--------------|--------------------------|
| CNSR307147 | M      | 84  | MYBP C3 | Hereditary cardiomyopathies | Embolic stroke     | NM_000256:exon15:c.1377delC;p.P459fs     | P       | LP   |          | Y        |              |                          |
| CNSR308693 | M      | 72  | MYBP C3 | Hereditary cardiomyopathies | Embolic stroke     | NM_000256:exon15:c.C1387T;p.Q463X        | P       | P    |          | Y        |              |                          |
| CNSR309002 | F      | 80  | MYBP C3 | Hereditary cardiomyopathies | Embolic stroke     | NM_000256:exon13:c.1153_1168del:p.V385fs | P/LP    | LP   | Y        |          |              |                          |
| CNSR310109 | M      | 89  | MYBP C3 | Hereditary cardiomyopathies | Embolic stroke     | NM_000256:exon14:c.G1256A;p.R419H        | LP      | VUS  |          |          | Y            |                          |
| CNSR310251 | M      | 58  | MYBP C3 | Hereditary cardiomyopathies | Embolic stroke     | NM_000256:exon13:c.G1187A;p.W396X        | NA      | P    |          | Y        |              |                          |
| CNSR310405 | M      | 46  | MYBP C3 | Hereditary cardiomyopathies | Embolic stroke     | NM_000256:exon14:c.G1256A;p.R419H        | LP      | VUS  |          |          | Y            |                          |
| CNSR300926 | F      | 48  | NKX2-5  | Tetralogy of Fallot         | Embolic stroke     | NM_001166176:exon2:c.386delT;p.L129X     | NA      | LP   |          |          | Y            |                          |
| CNSR301214 | M      | 67  | NKX2-5  | Tetralogy of Fallot         | Embolic stroke     | NM_001166176:exon2:c.386delT;p.L129X     | NA      | LP   |          |          | Y            |                          |
| CNSR302885 | F      | 62  | NKX2-5  | Tetralogy of Fallot         | Embolic stroke     | NM_001166176:exon2:c.386delT;p.L129X     | NA      | LP   |          |          | Y            |                          |
| CNSR303343 | M      | 68  | NKX2-5  | Tetralogy of Fallot         | Embolic stroke     | NM_001166176:exon2:c.C349T;p.R117X       | NA      | LP   |          |          | Y            |                          |



eTable 3 Continued

| Code_n     | Gender | Age | Gene    | Phenotype                    | Etiology of stroke | Mutation                                  | Clinvar | ACMG | Definite | Possible | Undetermined | Insufficient Information |
|------------|--------|-----|---------|------------------------------|--------------------|-------------------------------------------|---------|------|----------|----------|--------------|--------------------------|
| CNSR303636 | F      | 68  | NKX2-5  | Tetralogy of Fallot          | Embolic stroke     | NM_001166176:exon2:c.386delT:p.L129X      | NA      | LP   |          |          | Y            |                          |
| CNSR304524 | M      | 54  | NKX2-5  | Tetralogy of Fallot          | Embolic stroke     | NM_001166176:exon2:c.386delT:p.L129X      | NA      | LP   |          |          | Y            |                          |
| CNSR309531 | F      | 48  | NKX2-5  | Tetralogy of Fallot          | Embolic stroke     | NM_001166176:exon2:c.386delT:p.L129X      | NA      | LP   |          |          | Y            |                          |
| CNSR310093 | F      | 44  | NKX2-5  | Tetralogy of Fallot          | Embolic stroke     | NM_001166176:exon2:c.386delT:p.L129X      | NA      | LP   |          |          | Y            |                          |
| CNSR310271 | F      | 75  | NKX2-5  | Tetralogy of Fallot          | Embolic stroke     | NM_001166176:exon2:c.386delT:p.L129X      | NA      | LP   |          |          | Y            |                          |
| CNSR304051 | F      | 34  | NPPA    | Hereditary cardiac dysrhythm | Embolic stroke     | NM_006172:exon2:c.C319T:p.R107X           | NA      | LP   |          |          | Y            |                          |
| CNSR304789 | F      | 81  | NPPA    | Hereditary cardiac dysrhythm | Embolic stroke     | NM_006172:exon2:c.C181T:p.Q61X            | NA      | P    |          |          | Y            |                          |
| CNSR303354 | M      | 45  | PRKA G2 | Hereditary cardiomyopathies  | Embolic stroke     | NM_016203:exon7:c.914delC:p.P305fs        | NA      | LP   |          |          | Y            |                          |
| CNSR304520 | F      | 60  | PRKA G2 | Hereditary cardiomyopathies  | Embolic stroke     | NM_016203:exon4:c.G547A:p.E183K           | P       | VUS  |          | Y        |              |                          |
| CNSR308259 | M      | 57  | PRKA G2 | Hereditary cardiomyopathies  | Embolic stroke     | NM_024429:exon7:c.445_446delinsAA:p.P149N | NA      | LP   |          |          | Y            |                          |
| CNSR309141 | M      | 60  | PRKA G2 | Hereditary cardiomyopathies  | Embolic stroke     | NM_016203:exon7:c.G922C:p.E308Q           | NA      | LP   |          |          | Y            |                          |
| CNSR309562 | F      | 84  | PRKA G2 | Hereditary cardiomyopathies  | Embolic stroke     | NM_016203:exon13:c.A1402C:p.K468Q         | NA      | LP   |          |          | Y            |                          |

eTable 3 Continued

| Code_n     | Gender | Age | Gene    | Phenotype                    | Etiology of stroke | Mutation                                      | Clinvar | ACMG | Definite | Possible | Undetermined | Insufficient Information |
|------------|--------|-----|---------|------------------------------|--------------------|-----------------------------------------------|---------|------|----------|----------|--------------|--------------------------|
| CNSR309699 | F      | 52  | PRKAG2  | Hereditary cardiomyopathies  | Embolic stroke     | NM_016203:exon4:c.G547A:p.E183K               | P       | VUS  |          |          | Y            |                          |
| CNSR304696 | M      | 49  | PRKAR1A | Carney complex, type 1       | Embolic stroke     | NM_212472.2(PRKAR1A):c.709-7_709-2del         | P       | VUS  |          |          | Y            |                          |
| CNSR300155 | M      | 38  | RBM20   | Hereditary cardiomyopathies  | Embolic stroke     | NM_001134363:exon2:c.471delA:p.A157fs         | NA      | LP   |          |          | Y            |                          |
| CNSR301927 | M      | 51  | RBM20   | Hereditary cardiomyopathies  | Embolic stroke     | NM_001134363:exon2:c.699_702del:p.K233fs      | NA      | LP   |          | Y        |              |                          |
| CNSR306544 | M      | 51  | RBM20   | Hereditary cardiomyopathies  | Embolic stroke     | NM_001134363:exon6:c.1668+1G>T                | NA      | P    |          |          | Y            |                          |
| CNSR310082 | M      | 50  | RBM20   | Hereditary cardiomyopathies  | Embolic stroke     | NM_001134363:exon10:c.2615_2616insAG:p.E872fs | NA      | LP   |          |          | Y            |                          |
| CNSR306204 | F      | 77  | SCN1B   | Hereditary cardiac dysrhythm | Embolic stroke     | NM_001037.5(SCN1B):c.590+1G>A                 | LP      | VUS  |          |          | Y            |                          |
| CNSR304738 | F      | 68  | SCN2B   | Hereditary cardiac dysrhythm | Embolic stroke     | NM_004588:exon2:c.G172A:p.V58M                | NA      | LP   | Y        |          |              |                          |
| CNSR305339 | M      | 84  | SCN2B   | Hereditary cardiac dysrhythm | Embolic stroke     | NM_004588:exon2:c.C142G:p.L48V                | NA      | LP   | Y        |          |              |                          |
| CNSR306524 | M      | 61  | SCN2B   | Hereditary cardiac dysrhythm | Embolic stroke     | NM_004588:exon2:c.G172A:p.V58M                | NA      | LP   |          | Y        |              |                          |
| CNSR303696 | M      | 61  | SCN3B   | Hereditary cardiac dysrhythm | Embolic stroke     | NM_018400:exon3:c.A326G:p.N109S               | NA      | LP   |          |          | Y            |                          |
| CNSR300328 | M      | 62  | SCN4B   | Hereditary cardiac dysrhythm | Embolic stroke     | NM_174934:exon2:c.C140A:p.T47K                | NA      | LP   |          |          | Y            |                          |
| CNSR301522 | M      | 72  | SCN4B   | Hereditary cardiac dysrhythm | Embolic stroke     | NM_174934:exon5:c.G602A:p.C201Y               | NA      | LP   |          | Y        |              |                          |

eTable 3 Continued

| Code_n     | Gender | Age | Gene  | Phenotype                    | Etiology of stroke | Mutation                              | Clinvar | ACMG | Definite | Possible | Undetermined | Insufficient Information |
|------------|--------|-----|-------|------------------------------|--------------------|---------------------------------------|---------|------|----------|----------|--------------|--------------------------|
| CNSR302551 | F      | 57  | SCN4B | Hereditary cardiac dysrhythm | Embolic stroke     | NM_174934:exon3:c.G373A:p.D125N       | NA      | LP   |          |          | Y            |                          |
| CNSR303785 | M      | 71  | SCN4B | Hereditary cardiac dysrhythm | Embolic stroke     | NM_174934:exon4:c.G514A:p.G172R       | NA      | LP   | Y        |          |              |                          |
| CNSR305818 | F      | 70  | SCN4B | Hereditary cardiac dysrhythm | Embolic stroke     | NM_174934:exon5:c.G607C:p.V203L       | NA      | LP   |          |          | Y            |                          |
| CNSR306117 | F      | 82  | SCN4B | Hereditary cardiac dysrhythm | Embolic stroke     | NM_174934:exon2:c.C76T:p.P26S         | NA      | LP   |          | Y        |              |                          |
| CNSR309161 | M      | 54  | SCN4B | Hereditary cardiac dysrhythm | Embolic stroke     | NM_174934:exon4:c.T565G:p.F189V       | NA      | LP   |          |          | Y            |                          |
| CNSR309232 | M      | 65  | SCN4B | Hereditary cardiac dysrhythm | Embolic stroke     | NM_174934:exon4:c.T509C:p.V170A       | NA      | LP   |          |          | Y            |                          |
| CNSR302210 | M      | 61  | SCN5A | Hereditary cardiac dysrhythm | Embolic stroke     | NM_198056:exon7:c.G845A:p.R282H       | P       | VUS  |          |          | Y            |                          |
| CNSR304301 | M      | 66  | SCN5A | Hereditary cardiac dysrhythm | Embolic stroke     | NM_198056:exon24:c.4246delG:p.A1416fs | NA      | LP   |          |          | Y            |                          |
| CNSR305555 | F      | 53  | SCN5A | Hereditary cardiac dysrhythm | Embolic stroke     | NM_198056:exon16:c.C2440T:p.R814W     | P/LP    | VUS  |          | Y        |              |                          |
| CNSR305563 | M      | 77  | SCN5A | Hereditary cardiac dysrhythm | Embolic stroke     | NM_198056:exon28:c.G4931A:p.R1644H    | P       | VUS  |          |          | Y            |                          |
| CNSR309188 | M      | 40  | SCN5A | Hereditary cardiac dysrhythm | Embolic stroke     | NM_198056:exon28:c.G4931A:p.R1644H    | P       | VUS  |          |          | Y            |                          |
| CNSR300443 | F      | 49  | TLL1  | Atrial septal defect         | Embolic stroke     | NM_012464:exon19:c.2566delC:p.P856fs  | NA      | LP   |          |          | Y            |                          |

eTable 3 Continued

| Code_n     | Gender | Age | Gene | Phenotype                   | Etiology of stroke | Mutation                                             | Clinvar | ACMG | Definite | Possible | Undetermined | Insufficient Information |
|------------|--------|-----|------|-----------------------------|--------------------|------------------------------------------------------|---------|------|----------|----------|--------------|--------------------------|
| CNSR300397 | F      | 68  | TTN  | Hereditary cardiomyopathies | Embolic stroke     | NM_001267550:exon326:c.C76717T:p.R25573X             | LP      | P    |          |          | Y            |                          |
| CNSR300902 | M      | 51  | TTN  | Hereditary cardiomyopathies | Embolic stroke     | NM_133379:exon46:c.T13254G:p.Y4418X                  | NA      | LP   |          |          | Y            |                          |
| CNSR300950 | F      | 66  | TTN  | Hereditary cardiomyopathies | Embolic stroke     | NM_001267550:exon326:c.69869_69870insAAGA:p.D23290fs | NA      | LP   |          |          | Y            |                          |
| CNSR301273 | F      | 77  | TTN  | Hereditary cardiomyopathies | Embolic stroke     | NM_001267550:exon50:c.C14864G:p.S4955X               | NA      | P    |          |          | Y            |                          |
| CNSR301296 | M      | 56  | TTN  | Hereditary cardiomyopathies | Embolic stroke     | NM_001267550:exon304:c.C62299T:p.Q20767X             | NA      | P    |          |          | Y            |                          |
| CNSR301340 | M      | 66  | TTN  | Hereditary cardiomyopathies | Embolic stroke     | NM_001267550:exon46:c.G10819T:p.E3607X               | NA      | LP   |          |          | Y            |                          |
| CNSR301524 | M      | 65  | TTN  | Hereditary cardiomyopathies | Embolic stroke     | NM_133379:exon46:c.C11806T:p.R3936X                  | NA      | LP   |          |          | Y            |                          |
| CNSR301692 | F      | 81  | TTN  | Hereditary cardiomyopathies | Embolic stroke     | NM_133379:exon46:c.T13254G:p.Y4418X                  | NA      | LP   |          |          | Y            |                          |
| CNSR301708 | M      | 51  | TTN  | Hereditary cardiomyopathies | Embolic stroke     | NM_001267550:exon322:c.C68449T:p.R22817X             | P/LP    | LP   |          |          | Y            |                          |
| CNSR301710 | M      | 60  | TTN  | Hereditary cardiomyopathies | Embolic stroke     | NM_001267550:exon283:c.54989delC:p.T18330fs          | NA      | LP   |          |          | Y            |                          |

eTable 3 Continued

| Code_n     | Gender | Age | Gene | Phenotype                   | Etiology of stroke | Mutation                                    | Clinvar | ACMG | Definite | Possible | Undetermined | Insufficient Information |
|------------|--------|-----|------|-----------------------------|--------------------|---------------------------------------------|---------|------|----------|----------|--------------|--------------------------|
| CNSR301726 | M      | 71  | TTN  | Hereditary cardiomyopathies | Embolic stroke     | NM_001267550:exon358:c.C104947T:p.Q34983X   | LP      | P    |          |          | Y            |                          |
| CNSR301743 | F      | 65  | TTN  | Hereditary cardiomyopathies | Embolic stroke     | NM_001267550:exon61:c.G17856A:p.W5952X      | NA      | P    |          |          | Y            |                          |
| CNSR301816 | F      | 61  | TTN  | Hereditary cardiomyopathies | Embolic stroke     | NM_001267550:exon240:c.44335delG:p.E14779fs | NA      | LP   |          |          | Y            |                          |
| CNSR301883 | M      | 38  | TTN  | Hereditary cardiomyopathies | Embolic stroke     | NM_001267550:exon266:c.49991delC:p.T16664fs | NA      | LP   |          |          | Y            |                          |
| CNSR301922 | M      | 80  | TTN  | Hereditary cardiomyopathies | Embolic stroke     | NM_001267550:exon62:c.C18055T:p.Q6019X      | NA      | P    |          |          | Y            |                          |
| CNSR302004 | F      | 73  | TTN  | Hereditary cardiomyopathies | Embolic stroke     | NM_001267550:exon92:c.26483-1G>A            | NA      | P    |          |          | Y            |                          |
| CNSR302024 | F      | 59  | TTN  | Hereditary cardiomyopathies | Embolic stroke     | NM_001267550:exon361:c.107377+1G>C          | NA      | P    |          |          | Y            |                          |
| CNSR302155 | M      | 55  | TTN  | Hereditary cardiomyopathies | Embolic stroke     | NM_001267550:exon103:c.G29590T:p.E9864X     | NA      | P    |          |          | Y            |                          |
| CNSR302306 | M      | 47  | TTN  | Hereditary cardiomyopathies | Embolic stroke     | NM_133379:exon46:c.13482delC:p.A4494fs      | NA      | LP   |          |          | Y            |                          |
| CNSR302383 | M      | 54  | TTN  | Hereditary cardiomyopathies | Embolic stroke     | NM_001267550:exon46:c.G10819T:p.E3607X      | NA      | LP   |          |          | Y            |                          |

eTable 3 Continued

| Code_n     | Gender | Age | Gene | Phenotype                   | Etiology of stroke | Mutation                                         | Clinvar | ACMG | Definite | Possible | Undetermined | Insufficient Information |
|------------|--------|-----|------|-----------------------------|--------------------|--------------------------------------------------|---------|------|----------|----------|--------------|--------------------------|
| CNSR302462 | F      | 59  | TTN  | Hereditary cardiomyopathies | Embolic stroke     | NM_133379:exon46:c.C14113T:p.R4705X              | NA      | LP   |          |          | Y            |                          |
| CNSR302468 | M      | 53  | TTN  | Hereditary cardiomyopathies | Embolic stroke     | NM_001267550:exon143:c.33826+2T>A                | NA      | P    |          | Y        |              |                          |
| CNSR302498 | F      | 63  | TTN  | Hereditary cardiomyopathies | Embolic stroke     | NM_001267550:exon314:c.T66159G:p.Y22053X         | NA      | LP   |          |          | Y            |                          |
| CNSR302527 | F      | 28  | TTN  | Hereditary cardiomyopathies | Embolic stroke     | NM_001267550:exon338:c.G92001A:p.W30667X         | NA      | P    |          |          | Y            |                          |
| CNSR302655 | F      | 43  | TTN  | Hereditary cardiomyopathies | Embolic stroke     | NM_001267550:exon92:c.26483-1G>A                 | NA      | P    |          |          | Y            |                          |
| CNSR302687 | F      | 62  | TTN  | Hereditary cardiomyopathies | Embolic stroke     | NM_133379:exon46:c.T13254G:p.Y4418X              | NA      | LP   |          |          | Y            |                          |
| CNSR302703 | F      | 63  | TTN  | Hereditary cardiomyopathies | Embolic stroke     | NM_001267550:exon332:c.88636_88637del:p.V29546fs | NA      | LP   |          |          | Y            |                          |
| CNSR302733 | M      | 76  | TTN  | Hereditary cardiomyopathies | Embolic stroke     | NM_133379:exon46:c.14580delT:p.Y4860X            | NA      | LP   |          |          | Y            |                          |
| CNSR302739 | M      | 42  | TTN  | Hereditary cardiomyopathies | Embolic stroke     | NM_133379:exon46:c.13962delG:p.T4654fs           | NA      | LP   |          |          | Y            |                          |
| CNSR302803 | M      | 65  | TTN  | Hereditary cardiomyopathies | Embolic stroke     | NM_001267550:exon346:c.96144delG:p.W32048X       | NA      | LP   |          | Y        |              |                          |

eTable 3 Continued

| Code_n     | Gender | Age | Gene | Phenotype                   | Etiology of stroke | Mutation                                    | Clinvar | ACMG | Definite | Possible | Undetermined | Insufficient Information |
|------------|--------|-----|------|-----------------------------|--------------------|---------------------------------------------|---------|------|----------|----------|--------------|--------------------------|
| CNSR302812 | M      | 84  | TTN  | Hereditary cardiomyopathies | Embolic stroke     | NM_001267550:exon360:c.G106945T:p.E35649X   | NA      | P    |          |          | Y            |                          |
| CNSR302836 | F      | 56  | TTN  | Hereditary cardiomyopathies | Embolic stroke     | NM_133378.4:c.59644+1G>A                    | LP      | VUS  |          |          | Y            |                          |
| CNSR302853 | M      | 55  | TTN  | Hereditary cardiomyopathies | Embolic stroke     | NM_001267550:exon46:c.G10819T:p.E3607X      | NA      | LP   |          |          | Y            |                          |
| CNSR302922 | M      | 46  | TTN  | Hereditary cardiomyopathies | Embolic stroke     | NM_001267550:exon319:c.C67495T:p.R22499X    | P/LP    | P    |          |          | Y            |                          |
| CNSR303144 | M      | 69  | TTN  | Hereditary cardiomyopathies | Embolic stroke     | NM_001267550:exon358:c.C104947T:p.Q34983X   | LP      | P    |          | Y        |              |                          |
| CNSR303232 | M      | 65  | TTN  | Hereditary cardiomyopathies | Embolic stroke     | NM_001267550:exon265:c.G49659A:p.W16553X    | NA      | P    |          |          | Y            |                          |
| CNSR303373 | M      | 45  | TTN  | Hereditary cardiomyopathies | Embolic stroke     | NM_001267550:exon46:c.G10819T:p.E3607X      | NA      | LP   |          |          | Y            |                          |
| CNSR303397 | M      | 59  | TTN  | Hereditary cardiomyopathies | Embolic stroke     | NM_001267550:exon48:c.11884delG:p.V3962fs   | NA      | LP   |          | Y        |              |                          |
| CNSR303414 | M      | 82  | TTN  | Hereditary cardiomyopathies | Embolic stroke     | NM_001267550:exon289:c.56275delA:p.T18759fs | NA      | LP   |          |          | Y            |                          |
| CNSR303473 | F      | 68  | TTN  | Hereditary cardiomyopathies | Embolic stroke     | NM_001267550:exon304:c.C63025T:p.R21009X    | P/LP    | P    |          |          | Y            |                          |

eTable 3 Continued

| Code_n     | Gender | Age | Gene | Phenotype                   | Etiology of stroke | Mutation                                         | Clinvar | ACMG | Definition | Possible | Undetermined | Insufficient Information |
|------------|--------|-----|------|-----------------------------|--------------------|--------------------------------------------------|---------|------|------------|----------|--------------|--------------------------|
| CNSR303486 | M      | 70  | TTN  | Hereditary cardiomyopathies | Embolic stroke     | NM_001267550:exon52:c.G15304T:p.G5102X           | NA      | P    |            |          | Y            |                          |
| CNSR303552 | F      | 60  | TTN  | Hereditary cardiomyopathies | Embolic stroke     | NM_001267550:exon45:c.C10405T:p.Q3469X           | NA      | P    |            |          | Y            |                          |
| CNSR303676 | M      | 48  | TTN  | Hereditary cardiomyopathies | Embolic stroke     | NM_001267550:exon326:c.76397_76398del:p.I25466fs | P       | LP   |            |          | Y            |                          |
| CNSR303961 | M      | 82  | TTN  | Hereditary cardiomyopathies | Embolic stroke     | NM_133379:exon46:c.13897dupC:p.Q4633fs           | NA      | LP   |            |          | Y            |                          |
| CNSR303985 | F      | 75  | TTN  | Hereditary cardiomyopathies | Embolic stroke     | NM_001267550:exon159:c.G35500T:p.E11834X         | NA      | P    |            |          | Y            |                          |
| CNSR304024 | M      | 72  | TTN  | Hereditary cardiomyopathies | Embolic stroke     | NM_001267550:exon138:c.33340+2T>C                | NA      | P    |            |          | Y            |                          |
| CNSR304056 | F      | 51  | TTN  | Hereditary cardiomyopathies | Embolic stroke     | NM_001267550.2:c.49345+2T>C                      | LP      | VUS  |            |          | Y            |                          |
| CNSR304056 | F      | 51  | TTN  | Hereditary cardiomyopathies | Embolic stroke     | NM_133379:exon46:c.12571delA:p.T4191fs           | NA      | LP   |            |          | Y            |                          |
| CNSR304076 | F      | 70  | TTN  | Hereditary cardiomyopathies | Embolic stroke     | NM_001267550:exon271:c.C51436T:p.Q17146X         | P       | P    |            |          | Y            |                          |
| CNSR304115 | F      | 72  | TTN  | Hereditary cardiomyopathies | Embolic stroke     | NM_001267550:exon248:c.46201_46204del:p.T15401fs | NA      | LP   |            |          | Y            |                          |



eTable 3 Continued

| Code_n     | Gender | Age | Gene | Phenotype                   | Etiology of stroke | Mutation                                                               | Clinvar | ACMG | Definite | Possible | Undetermined | Insufficient Information |
|------------|--------|-----|------|-----------------------------|--------------------|------------------------------------------------------------------------|---------|------|----------|----------|--------------|--------------------------|
| CNSR304236 | M      | 72  | TTN  | Hereditary cardiomyopathies | Embolic stroke     | NM_001267550:exon46:c.G10819T:p.E3607X                                 | NA      | LP   |          |          | Y            |                          |
| CNSR304295 | M      | 46  | TTN  | Hereditary cardiomyopathies | Embolic stroke     | NM_001267550:exon100:c.28907delG;p.C9636fs                             | NA      | LP   |          |          | Y            |                          |
| CNSR304443 | F      | 66  | TTN  | Hereditary cardiomyopathies | Embolic stroke     | NM_001267550:exon251:c.46821_46906del:p.P15607fs                       | NA      | LP   |          |          | Y            |                          |
| CNSR304630 | F      | 77  | TTN  | Hereditary cardiomyopathies | Embolic stroke     | NM_001267550:exon87:c.25083_25086del:p.F8361fs                         | NA      | LP   |          | Y        |              |                          |
| CNSR304797 | M      | 57  | TTN  | Hereditary cardiomyopathies | Embolic stroke     | NM_133379:exon46:c.13550delT;p.M4517fs                                 | NA      | LP   |          |          | Y            |                          |
| CNSR305023 | M      | 72  | TTN  | Hereditary cardiomyopathies | Embolic stroke     | NM_001267550:exon63:c.C18541T:p.R6181X                                 | NA      | P    |          |          | Y            |                          |
| CNSR305065 | F      | 68  | TTN  | Hereditary cardiomyopathies | Embolic stroke     | NM_133379:exon46:c.14463_14464del:p.T4821fs                            | NA      | LP   |          |          | Y            |                          |
| CNSR305258 | M      | 63  | TTN  | Hereditary cardiomyopathies | Embolic stroke     | NM_001267550.2:c.49345+2T>C                                            | LP      | VUS  |          |          | Y            |                          |
| CNSR305258 | M      | 63  | TTN  | Hereditary cardiomyopathies | Embolic stroke     | NM_133379:exon46:c.12571delA;p.T4191fs                                 | NA      | LP   |          |          | Y            |                          |
| CNSR305322 | F      | 53  | TTN  | Hereditary cardiomyopathies | Embolic stroke     | NM_003319:exon45:c.11505_11506insAATTAATTCATTACA;p.V3836_E3837delinsNX | NA      | LP   |          |          | Y            |                          |

eTable 3 Continued

| Code_n     | Gender | Age | Gene | Phenotype                   | Etiology of stroke | Mutation                                    | Clinvar | ACMG | Definite | Possible | Undetermined | Insufficient Information |
|------------|--------|-----|------|-----------------------------|--------------------|---------------------------------------------|---------|------|----------|----------|--------------|--------------------------|
| CNSR305448 | M      | 61  | TTN  | Hereditary cardiomyopathies | Embolic stroke     | NM_001267550:exon45:c.C10405T;p.Q3469X      | NA      | P    |          |          | Y            |                          |
| CNSR305694 | M      | 60  | TTN  | Hereditary cardiomyopathies | Embolic stroke     | NM_001267550:exon55:c.16112delA:p.N5371fs   | NA      | LP   |          |          | Y            |                          |
| CNSR305735 | M      | 62  | TTN  | Hereditary cardiomyopathies | Embolic stroke     | NM_001267550:exon352:c.98381delG:p.G32794fs | NA      | LP   |          |          | Y            |                          |
| CNSR305812 | M      | 71  | TTN  | Hereditary cardiomyopathies | Embolic stroke     | NM_001267550:exon163:c.35813delA:p.K11938fs | NA      | LP   |          |          | Y            |                          |
| CNSR306351 | M      | 57  | TTN  | Hereditary cardiomyopathies | Embolic stroke     | NM_001267550.2:c.49345+2T>C                 | LP      | VUS  |          |          | Y            |                          |
| CNSR306351 | M      | 57  | TTN  | Hereditary cardiomyopathies | Embolic stroke     | NM_133379:exon46:c.12571delA:p.T4191fs      | NA      | LP   |          |          | Y            |                          |
| CNSR306385 | F      | 67  | TTN  | Hereditary cardiomyopathies | Embolic stroke     | NM_001267550:exon56:c.C16404A;p.C5468X      | NA      | P    |          |          | Y            |                          |
| CNSR306470 | M      | 70  | TTN  | Hereditary cardiomyopathies | Embolic stroke     | NM_001267550:exon358:c.C104947T;p.Q34983X   | LP      | P    |          |          | Y            |                          |
| CNSR306608 | M      | 48  | TTN  | Hereditary cardiomyopathies | Embolic stroke     | NM_001267550:exon63:c.C18541T;p.R6181X      | NA      | P    |          |          | Y            |                          |
| CNSR307049 | M      | 79  | TTN  | Hereditary cardiomyopathies | Embolic stroke     | NM_001267550:exon280:c.C54067T;p.R18023X    | LP      | P    |          |          | Y            |                          |

eTable 3 Continued

| Code_n     | Gender | Age | Gene | Phenotype                   | Etiology of stroke | Mutation                                    | Clinvar | ACMG | Definite | Possible | Undetermined | Insufficient Information |
|------------|--------|-----|------|-----------------------------|--------------------|---------------------------------------------|---------|------|----------|----------|--------------|--------------------------|
| CNSR307096 | M      | 78  | TTN  | Hereditary cardiomyopathies | Embolic stroke     | NM_001267550:exon92:c.26483-2A>G            | NA      | P    |          | Y        |              |                          |
| CNSR307169 | M      | 61  | TTN  | Hereditary cardiomyopathies | Embolic stroke     | NM_133379:exon46:c.11782_11783del;p.M3928fs | NA      | LP   |          |          | Y            |                          |
| CNSR307344 | F      | 70  | TTN  | Hereditary cardiomyopathies | Embolic stroke     | NM_133379:exon46:c.11416_11419del;p.I3806fs | NA      | LP   |          |          | Y            |                          |
| CNSR307493 | F      | 68  | TTN  | Hereditary cardiomyopathies | Embolic stroke     | NM_001267550:exon347:c.96504delA;p.G32168fs | NA      | LP   |          |          | Y            |                          |
| CNSR307561 | M      | 55  | TTN  | Hereditary cardiomyopathies | Embolic stroke     | NM_001267550:exon322:c.68527+1G>T           | NA      | P    |          |          | Y            |                          |
| CNSR307677 | M      | 65  | TTN  | Hereditary cardiomyopathies | Embolic stroke     | NM_133379:exon46:c.T13254G;p.Y4418X         | NA      | LP   |          |          | Y            |                          |
| CNSR307734 | M      | 63  | TTN  | Hereditary cardiomyopathies | Embolic stroke     | NM_001267550.2:c.49345+2T>C                 | LP      | VUS  |          |          | Y            |                          |
| CNSR307734 | M      | 63  | TTN  | Hereditary cardiomyopathies | Embolic stroke     | NM_133379:exon46:c.12571delA;p.T4191fs      | NA      | LP   |          |          | Y            |                          |
| CNSR307750 | M      | 52  | TTN  | Hereditary cardiomyopathies | Embolic stroke     | NM_001267550:exon339:c.A92854T;p.R30952X    | NA      | P    |          |          | Y            |                          |
| CNSR307875 | M      | 73  | TTN  | Hereditary cardiomyopathies | Embolic stroke     | NM_001267550:exon46:c.G10819T;p.E3607X      | NA      | LP   |          |          | Y            |                          |

eTable 3 Continued

| Code_n     | Gender | Age | Gene | Phenotype                   | Etiology of stroke | Mutation                                             | Clinvar | ACMG | Definite | Possible | Undetermined | Insufficient Information |
|------------|--------|-----|------|-----------------------------|--------------------|------------------------------------------------------|---------|------|----------|----------|--------------|--------------------------|
| CNSR308005 | M      | 48  | TTN  | Hereditary cardiomyopathies | Embolic stroke     | NM_001267550:exon46:c.C10735T:p.Q3579X               | NA      | P    |          |          | Y            |                          |
| CNSR308032 | M      | 72  | TTN  | Hereditary cardiomyopathies | Embolic stroke     | NM_001267550:exon46:c.G10819T:p.E3607X               | NA      | LP   |          | Y        |              |                          |
| CNSR308096 | M      | 58  | TTN  | Hereditary cardiomyopathies | Embolic stroke     | NM_001267550:exon46:c.G10819T:p.E3607X               | NA      | LP   |          |          | Y            |                          |
| CNSR308211 | M      | 87  | TTN  | Hereditary cardiomyopathies | Embolic stroke     | NM_001267550:exon91:c.G26254T:p.E8752X               | NA      | P    |          |          | Y            |                          |
| CNSR308221 | M      | 75  | TTN  | Hereditary cardiomyopathies | Embolic stroke     | NM_001267550:exon137:c.33247+1G>A                    | NA      | P    |          |          | Y            |                          |
| CNSR308406 | F      | 80  | TTN  | Hereditary cardiomyopathies | Embolic stroke     | NM_001267550:exon324:c.69179_69180insTTAC:p.T23060fs | NA      | LP   |          |          | Y            |                          |
| CNSR308440 | F      | 58  | TTN  | Hereditary cardiomyopathies | Embolic stroke     | NM_001267550:exon360:c.G106914A:p.W35638X            | NA      | P    |          |          | Y            |                          |
| CNSR308503 | F      | 65  | TTN  | Hereditary cardiomyopathies | Embolic stroke     | NM_001267550:exon343:c.95246delA:p.E31749fs          | NA      | LP   |          |          | Y            |                          |
| CNSR308517 | M      | 47  | TTN  | Hereditary cardiomyopathies | Embolic stroke     | NM_001267550:exon328:c.87432delT:p.P29144fs          | NA      | LP   |          |          | Y            |                          |
| CNSR308532 | M      | 59  | TTN  | Hereditary cardiomyopathies | Embolic stroke     | NM_001267550:exon93:c.26979dupT:p.G8994fs            | NA      | LP   |          |          | Y            |                          |

eTable 3 Continued

| Code_n     | Gender | Age | Gene | Phenotype                   | Etiology of stroke | Mutation                                       | Clinvar | ACMG | Definite | Possible | Undetermined | Insufficient Information |
|------------|--------|-----|------|-----------------------------|--------------------|------------------------------------------------|---------|------|----------|----------|--------------|--------------------------|
| CNSR308562 | M      | 78  | TTN  | Hereditary cardiomyopathies | Embolic stroke     | NM_133379:exon46:c.14236delA:p.T4746fs         | NA      | LP   |          |          | Y            |                          |
| CNSR308731 | F      | 72  | TTN  | Hereditary cardiomyopathies | Embolic stroke     | NM_001267550:exon82:c.23896_23897del:p.S7966fs | NA      | LP   |          |          | Y            |                          |
| CNSR308774 | M      | 73  | TTN  | Hereditary cardiomyopathies | Embolic stroke     | NM_001267550:exon87:c.25113delG:p.E8371fs      | NA      | LP   |          |          | Y            |                          |
| CNSR308791 | M      | 64  | TTN  | Hereditary cardiomyopathies | Embolic stroke     | NM_001267550:exon7:c.1205delC:p.A402fs         | NA      | LP   |          |          | Y            |                          |
| CNSR309122 | M      | 50  | TTN  | Hereditary cardiomyopathies | Embolic stroke     | NM_001267550:exon11:c.1732dupG:p.E578fs        | NA      | LP   |          |          | Y            |                          |
| CNSR309205 | M      | 72  | TTN  | Hereditary cardiomyopathies | Embolic stroke     | NM_133379:exon46:c.15075delT:p.V5025fs         | NA      | LP   |          |          | Y            |                          |
| CNSR309225 | F      | 53  | TTN  | Hereditary cardiomyopathies | Embolic stroke     | NM_133379:exon46:c.C11806T:p.R3936X            | NA      | LP   |          |          | Y            |                          |
| CNSR309332 | M      | 52  | TTN  | Hereditary cardiomyopathies | Embolic stroke     | NM_001267550:exon354:c.C99052T:p.Q33018X       | NA      | P    |          |          | Y            |                          |
| CNSR309344 | M      | 65  | TTN  | Hereditary cardiomyopathies | Embolic stroke     | NM_001267550.2:c.49345+2T>C                    | LP      | VUS  |          |          | Y            |                          |
| CNSR309344 | M      | 65  | TTN  | Hereditary cardiomyopathies | Embolic stroke     | NM_133379:exon46:c.12571delA:p.T4191fs         | NA      | LP   |          |          | Y            |                          |

eTable 3 Continued

| Code_n     | Gender | Age | Gene  | Phenotype                            | Etiology of stroke   | Mutation                                    | Clinvar | ACMG | Definite | Possible | Undetermined | Insufficient Information |
|------------|--------|-----|-------|--------------------------------------|----------------------|---------------------------------------------|---------|------|----------|----------|--------------|--------------------------|
| CNSR309386 | F      | 71  | TTN   | Hereditary cardiomyopathies          | Embolic stroke       | NM_001267550:exon46:c.G10819T:p.E3607X      | NA      | LP   |          |          | Y            |                          |
| CNSR309744 | M      | 48  | TTN   | Hereditary cardiomyopathies          | Embolic stroke       | NM_001267550:exon335:c.90597delA;p.G30199fs | NA      | LP   |          |          | Y            |                          |
| CNSR309871 | M      | 46  | TTN   | Hereditary cardiomyopathies          | Embolic stroke       | NM_001267550:exon46:c.G10819T:p.E3607X      | NA      | LP   |          |          | Y            |                          |
| CNSR310007 | M      | 61  | TTN   | Hereditary cardiomyopathies          | Embolic stroke       | NM_133379:exon46:c.C10522T:p.Q3508X         | NA      | LP   |          |          | Y            |                          |
| CNSR310370 | M      | 58  | TTN   | Hereditary cardiomyopathies          | Embolic stroke       | NM_001267550:exon46:c.G10819T:p.E3607X      | NA      | LP   |          |          | Y            |                          |
| CNSR310422 | M      | 62  | TTN   | Hereditary cardiomyopathies          | Embolic stroke       | NM_133379:exon46:c.T13254G:p.Y4418X         | NA      | LP   |          |          | Y            |                          |
| CNSR302718 | M      | 66  | ZFPM2 | Tetralogy of Fallot                  | Embolic stroke       | NM_012082:exon6:c.739+1G>A                  | NA      | P    |          |          | Y            |                          |
| CNSR310062 | M      | 60  | ZFPM2 | Tetralogy of Fallot                  | Embolic stroke       | NM_012082:exon7:c.G779A:p.R260Q             | P       | VUS  |          |          | Y            |                          |
| CNSR303911 | M      | 82  | ACTA2 | Aortic aneurysm, familial thoracic 6 | Large artery disease | NM_001613:exon3:c.170delG:p.G57fs           | NA      | LP   | Y        |          |              |                          |
| CNSR300368 | M      | 64  | APOA5 | Hyperchylomicronemia, late-onset     | Large artery disease | NM_052968:exon2:c.G30A:p.W10X               | NA      | P    |          |          | Y            |                          |
| CNSR307179 | F      | 50  | APOA5 | Hyperchylomicronemia, late-onset     | Large artery disease | NM_052968:exon2:c.G30A:p.W10X               | NA      | P    |          | Y        |              |                          |
| CNSR300355 | F      | 79  | CETP  | Hyperalphalipoproteinemia            | Large artery disease | NM_000078:exon2:c.T222G:p.Y74X              | NA      | LP   |          |          | Y            |                          |

eTable 3 Continued

| Code_n     | Gender | Age | Gene | Phenotype                 | Etiology of stroke   | Mutation                              | Clinvar | ACMG | Definite | Possible | Undetermined | Insufficient Information |
|------------|--------|-----|------|---------------------------|----------------------|---------------------------------------|---------|------|----------|----------|--------------|--------------------------|
| CNSR301124 | M      | 75  | CETP | Hyperalphalipoproteinemia | Large artery disease | NM_000078:exon9:c.783_786del;p.D261fs | NA      | LP   |          |          | Y            |                          |
| CNSR301461 | F      | 53  | CETP | Hyperalphalipoproteinemia | Large artery disease | NM_000078:exon6:c.G537A;p.W179X       | NA      | P    |          |          | Y            |                          |
| CNSR301827 | M      | 35  | CETP | Hyperalphalipoproteinemia | Large artery disease | NM_000078:exon2:c.T222G;p.Y74X        | NA      | LP   |          |          | Y            |                          |
| CNSR302864 | F      | 64  | CETP | Hyperalphalipoproteinemia | Large artery disease | NM_000078:exon2:c.T222G;p.Y74X        | NA      | LP   |          |          | Y            |                          |
| CNSR303299 | M      | 51  | CETP | Hyperalphalipoproteinemia | Large artery disease | NM_000078:exon9:c.783_786del;p.D261fs | NA      | LP   |          |          | Y            |                          |
| CNSR303732 | F      | 48  | CETP | Hyperalphalipoproteinemia | Large artery disease | NM_000078:exon11:c.1102delC;p.P368fs  | NA      | LP   |          |          | Y            |                          |
| CNSR304614 | M      | 62  | CETP | Hyperalphalipoproteinemia | Large artery disease | NM_000078:exon9:c.786dupC;p.L262fs    | NA      | LP   |          |          | Y            |                          |
| CNSR304790 | F      | 73  | CETP | Hyperalphalipoproteinemia | Large artery disease | NM_000078:exon9:c.783_786del;p.D261fs | NA      | LP   |          |          | Y            |                          |
| CNSR305067 | M      | 55  | CETP | Hyperalphalipoproteinemia | Large artery disease | NM_000078:exon9:c.786delC;p.L262fs    | NA      | LP   |          |          | Y            |                          |
| CNSR305247 | M      | 76  | CETP | Hyperalphalipoproteinemia | Large artery disease | NM_000078:exon9:c.783_786del;p.D261fs | NA      | LP   |          |          | Y            |                          |
| CNSR305437 | M      | 77  | CETP | Hyperalphalipoproteinemia | Large artery disease | NM_000078:exon9:c.C853T;p.R285X       | NA      | LP   |          |          | Y            |                          |
| CNSR305830 | M      | 45  | CETP | Hyperalphalipoproteinemia | Large artery disease | NM_000078:exon2:c.T222G;p.Y74X        | NA      | LP   |          |          | Y            |                          |

eTable 3 Continued

| Code_n     | Gender | Age | Gene | Phenotype                 | Etiology of stroke   | Mutation                              | Clinvar | ACMG | Definite | Possible | Undetermined | Insufficient Information |
|------------|--------|-----|------|---------------------------|----------------------|---------------------------------------|---------|------|----------|----------|--------------|--------------------------|
| CNSR305982 | M      | 75  | CETP | Hyperalphalipoproteinemia | Large artery disease | NM_000078:exon11:c.982-1G>C           | NA      | LP   |          |          | Y            |                          |
| CNSR306316 | F      | 46  | CETP | Hyperalphalipoproteinemia | Large artery disease | NM_000078:exon14:c.1321+1G>A          | P       | P    |          |          | Y            |                          |
| CNSR306620 | F      | 54  | CETP | Hyperalphalipoproteinemia | Large artery disease | NM_000078:exon12:c.1208delA:p.D403fs  | NA      | LP   |          |          | Y            |                          |
| CNSR306695 | M      | 59  | CETP | Hyperalphalipoproteinemia | Large artery disease | NM_000078:exon2:c.T222G;p.Y74X        | NA      | LP   |          |          | Y            |                          |
| CNSR306834 | M      | 85  | CETP | Hyperalphalipoproteinemia | Large artery disease | NM_000078:exon2:c.T222G;p.Y74X        | NA      | LP   |          |          | Y            |                          |
| CNSR307652 | M      | 70  | CETP | Hyperalphalipoproteinemia | Large artery disease | NM_000078:exon9:c.783_786del:p.D261fs | NA      | LP   |          |          | Y            |                          |
| CNSR307689 | M      | 50  | CETP | Hyperalphalipoproteinemia | Large artery disease | NM_000078:exon9:c.783_786del:p.D261fs | NA      | LP   |          |          | Y            |                          |
| CNSR307818 | M      | 88  | CETP | Hyperalphalipoproteinemia | Large artery disease | NM_000078:exon9:c.783_786del:p.D261fs | NA      | LP   |          |          | Y            |                          |
| CNSR307964 | M      | 47  | CETP | Hyperalphalipoproteinemia | Large artery disease | NM_000078:exon14:c.1321+1G>A          | P       | P    |          |          | Y            |                          |
| CNSR308010 | M      | 82  | CETP | Hyperalphalipoproteinemia | Large artery disease | NM_000078:exon2:c.C160T;p.R54X        | NA      | LP   |          |          | Y            |                          |
| CNSR308189 | M      | 64  | CETP | Hyperalphalipoproteinemia | Large artery disease | NM_000078:exon2:c.T222G;p.Y74X        | NA      | LP   |          |          | Y            |                          |
| CNSR308467 | F      | 81  | CETP | Hyperalphalipoproteinemia | Large artery disease | NM_000078:exon9:c.783_786del:p.D261fs | NA      | LP   |          |          | Y            |                          |



eTable 3 Continued

| Code_n     | Gender | Age | Gene   | Phenotype                 | Etiology of stroke   | Mutation                                      | Clinvar | ACMG | Definite | Possible | Undetermined | Insufficient Information |
|------------|--------|-----|--------|---------------------------|----------------------|-----------------------------------------------|---------|------|----------|----------|--------------|--------------------------|
| CNSR309068 | M      | 56  | CETP   | Hyperalphalipoproteinemia | Large artery disease | NM_000078:exon9:c.783_786del:p.D261fs         | NA      | LP   |          |          | Y            |                          |
| CNSR309319 | F      | 75  | CETP   | Hyperalphalipoproteinemia | Large artery disease | NM_000078:exon9:c.783_786del:p.D261fs         | NA      | LP   |          |          | Y            |                          |
| CNSR309412 | F      | 76  | CETP   | Hyperalphalipoproteinemia | Large artery disease | NM_000078:exon9:c.783_786del:p.D261fs         | NA      | LP   |          |          | Y            |                          |
| CNSR309459 | M      | 46  | CETP   | Hyperalphalipoproteinemia | Large artery disease | NM_000078:exon11:c.1102delC:p.P368fs          | NA      | LP   |          |          | Y            |                          |
| CNSR309700 | M      | 27  | CETP   | Hyperalphalipoproteinemia | Large artery disease | NM_000078:exon2:c.T222G:p.Y74X                | NA      | LP   |          |          | Y            |                          |
| CNSR310111 | F      | 79  | CETP   | Hyperalphalipoproteinemia | Large artery disease | NM_000078:exon9:c.783_786del:p.D261fs         | NA      | LP   |          |          | Y            |                          |
| CNSR304557 | F      | 56  | COL1A1 | CeAD,FMD,TAA,AAA          | Large artery disease | NM_000088:exon5:c.441delC:p.P147fs            | P       | LP   |          | Y        |              |                          |
| CNSR306617 | M      | 49  | COL1A1 | CeAD,FMD,TAA,AAA          | Large artery disease | NM_000088:exon37:c.G2594A:p.R865H             | LP      | VUS  |          |          | Y            |                          |
| CNSR306717 | F      | 63  | COL1A1 | CeAD,FMD,TAA,AAA          | Large artery disease | NM_000088:exon5:c.386_388delinsT:p.G129Lfs*39 | NA      | P    |          |          | Y            |                          |
| CNSR309324 | M      | 52  | COL1A1 | CeAD,FMD,TAA,AAA          | Large artery disease | NM_000088:exon21:c.1354-1G>C                  | NA      | P    |          | Y        |              |                          |
| CNSR305489 | F      | 77  | COL1A2 | CeAD,FMD,TAA,AAA          | Large artery disease | NM_000089:exon19:c.G946A:p.G316S              | P       | VUS  |          |          | Y            |                          |

eTable 3 Continued

| Code_n     | Gender | Age | Gene   | Phenotype                             | Etiology of stroke   | Mutation                              | Clinvar | ACMG | Definition | Possible | Undetermined | Insufficient Information |
|------------|--------|-----|--------|---------------------------------------|----------------------|---------------------------------------|---------|------|------------|----------|--------------|--------------------------|
| CNSR306054 | M      | 49  | COL1A2 | CeAD,FMD,TAA,AAA                      | Large artery disease | NM_000089:exon17:c.G874A:p.G292S      | P       | VUS  |            | Y        |              |                          |
| CNSR306112 | M      | 69  | COL1A2 | CeAD,FMD,TAA,AAA                      | Large artery disease | NM_000089:exon5:c.207delC;p.G69fs     | NA      | LP   |            | Y        |              |                          |
| CNSR304228 | M      | 72  | COL5A1 | Ehlers-Danlos syndrome, classic type, | Large artery disease | NM_000093:exon66:c.T5486G:p.F1829C    | LP      | VUS  |            |          | Y            |                          |
| CNSR306147 | F      | 67  | COL5A1 | Ehlers-Danlos syndrome, classic type, | Large artery disease | NM_001278074:exon64:c.C5095T:p.Q1699X | NA      | P    |            |          | Y            |                          |
| CNSR308149 | M      | 71  | COL5A1 | Ehlers-Danlos syndrome, classic type, | Large artery disease | NM_000093:exon48:c.G3781A:p.G1261R    | LP      | VUS  |            |          | Y            |                          |
| CNSR300432 | M      | 48  | ELN    | SVAS                                  | Large artery disease | NM_000501:exon14:c.686-2A>G           | NA      | P    |            |          | Y            |                          |
| CNSR300818 | M      | 83  | ELN    | SVAS                                  | Large artery disease | NM_000501:exon24:c.1621+1G>A          | LP      | P    |            |          | Y            |                          |
| CNSR301992 | M      | 72  | ELN    | SVAS                                  | Large artery disease | NM_000501:exon14:c.686-2A>G2A>G       | NA      | P    |            |          | Y            |                          |
| CNSR302656 | M      | 50  | ELN    | SVAS                                  | Large artery disease | NM_000501:exon14:c.686-2A>G           | NA      | P    |            |          | Y            |                          |
| CNSR305968 | F      | 78  | ELN    | SVAS                                  | Large artery disease | NM_001278939:exon26:c.1933+2T>A       | NA      | P    |            | Y        |              |                          |
| CNSR306387 | M      | 55  | ELN    | SVAS                                  | Large artery disease | NM_001278939:exon26:c.1933+2T>A       | NA      | P    |            | Y        |              |                          |
| CNSR307595 | M      | 60  | ELN    | SVAS                                  | Large artery disease | NM_000501:exon14:c.686-2A>G           | NA      | P    |            |          | Y            |                          |
| CNSR308754 | M      | 39  | ELN    | SVAS                                  | Large artery disease | NM_000501:exon11:c.571+1G>A           | NA      | P    |            |          | Y            |                          |

eTable 3 Continued

| Code_n     | Gender | Age | Gene | Phenotype                         | Etiology of stroke   | Mutation                           | Clinvar | ACMG | Definite | Possible | Undetermined | Insufficient Information |
|------------|--------|-----|------|-----------------------------------|----------------------|------------------------------------|---------|------|----------|----------|--------------|--------------------------|
| CNSR310118 | M      | 45  | ELN  | SVAS                              | Large artery disease | NM_000501:exon24:c.1621+1G>A       | LP      | P    | Y        |          |              |                          |
| CNSR300886 | M      | 75  | FBN1 | Marfan syndrome                   | Large artery disease | NM_000138:exon22:c.A2613C:p.L871F  | P       | VUS  |          |          | Y            |                          |
| CNSR301821 | M      | 64  | FBN1 | Marfan syndrome                   | Large artery disease | NM_000138:exon63:c.T7754C:p.I2585T | P/LP    | VUS  |          | Y        |              |                          |
| CNSR302393 | M      | 51  | FBN1 | Marfan syndrome                   | Large artery disease | NM_000138:exon22:c.A2613C:p.L871F  | P       | VUS  |          |          | Y            |                          |
| CNSR303067 | F      | 58  | FBN1 | Marfan syndrome                   | Large artery disease | NM_000138:exon22:c.A2613C:p.L871F  | P       | VUS  |          |          | Y            |                          |
| CNSR304747 | M      | 73  | FBN1 | Marfan syndrome                   | Large artery disease | NM_000138:exon22:c.A2613C:p.L871F  | P       | VUS  |          |          | Y            |                          |
| CNSR305922 | M      | 50  | FBN1 | Marfan syndrome                   | Large artery disease | NM_000138:exon22:c.A2613C:p.L871F  | P       | VUS  |          |          | Y            |                          |
| CNSR309171 | M      | 78  | FBN1 | Marfan syndrome                   | Large artery disease | NM_000138:exon10:c.G1091A:p.R364Q  | NA      | LP   |          |          | Y            |                          |
| CNSR300049 | M      | 53  | LDLR | Hypercholesterolemia, familial, 1 | Large artery disease | NM_000527:exon9:c.C1216A:p.R406R   | P       | VUS  |          |          | Y            |                          |
| CNSR300051 | F      | 42  | LDLR | Hypercholesterolemia, familial, 1 | Large artery disease | NM_000527:exon11:c.A1691G:p.N564S  | LP      | VUS  | Y        |          |              |                          |
| CNSR300104 | F      | 65  | LDLR | Hypercholesterolemia, familial, 1 | Large artery disease | NM_000527:exon11:c.T1592A:p.M531K  | NA      | LP   |          |          | Y            |                          |

eTable 3 Continued

| Code_n     | Gender | Age | Gene | Phenotype                         | Etiology of stroke   | Mutation                           | Clinvar | ACMG | Definite | Possible | Undetermined | Insufficient Information |
|------------|--------|-----|------|-----------------------------------|----------------------|------------------------------------|---------|------|----------|----------|--------------|--------------------------|
| CNSR300212 | F      | 48  | LDLR | Hypercholesterolemia, familial, 1 | Large artery disease | NM_000527:exon11:c.T1592A;p.M531K  | NA      | LP   |          |          | Y            |                          |
| CNSR300289 | M      | 62  | LDLR | Hypercholesterolemia, familial, 1 | Large artery disease | NM_000527:exon10:c.A1454T;p.H485L  | NA      | LP   |          | Y        |              |                          |
| CNSR300310 | M      | 41  | LDLR | Hypercholesterolemia, familial, 1 | Large artery disease | NM_000527:exon4:c.510delC;p.D170fs | P       | LP   | Y        |          |              |                          |
| CNSR300371 | F      | 76  | LDLR | Hypercholesterolemia, familial, 1 | Large artery disease | NM_000527:exon4:c.C516A;p.D172E    | NA      | LP   |          |          | Y            |                          |
| CNSR300418 | M      | 58  | LDLR | Hypercholesterolemia, familial, 1 | Large artery disease | NM_000527:exon16:c.A2344T;p.K782X  | P       | LP   |          | Y        |              |                          |
| CNSR300451 | F      | 81  | LDLR | Hypercholesterolemia, familial, 1 | Large artery disease | NM_000527:exon10:c.A1525G;p.K509E  | LP      | VUS  | Y        |          |              |                          |
| CNSR300867 | F      | 73  | LDLR | Hypercholesterolemia, familial, 1 | Large artery disease | NM_000527:exon13:c.G1879A;p.A627T  | P/LP    | VUS  |          |          | Y            |                          |
| CNSR301304 | M      | 57  | LDLR | Hypercholesterolemia, familial, 1 | Large artery disease | NM_000527:exon11:c.T1592A;p.M531K  | NA      | LP   |          | Y        |              |                          |
| CNSR301669 | F      | 70  | LDLR | Hypercholesterolemia, familial, 1 | Large artery disease | NM_000527:exon11:c.A1691G;p.N564S  | LP      | VUS  |          | Y        |              |                          |
| CNSR301850 | M      | 67  | LDLR | Hypercholesterolemia, familial, 1 | Large artery disease | NM_000527:exon7:c.T1016C;p.L339P   | LP      | VUS  | Y        |          |              |                          |
| CNSR302713 | M      | 42  | LDLR | Hypercholesterolemia, familial, 1 | Large artery disease | NM_000527:exon4:c.C487T;p.Q163X    | P       | LP   | Y        |          |              |                          |

eTable 3 Continued

| Code_n     | Gender | Age | Gene | Phenotype                         | Etiology of stroke   | Mutation                          | Clinvar | ACMG | Definite | Possible | Undetermined | Insufficient Information |
|------------|--------|-----|------|-----------------------------------|----------------------|-----------------------------------|---------|------|----------|----------|--------------|--------------------------|
| CNSR303264 | M      | 60  | LDLR | Hypercholesterolemia, familial, 1 | Large artery disease | NM_000527:exon13:c.C1880T;p.A627V | LP      | VUS  | Y        |          |              |                          |
| CNSR303708 | F      | 69  | LDLR | Hypercholesterolemia, familial, 1 | Large artery disease | NM_000527:exon13:c.G1864T;p.D622Y | NA      | LP   |          |          | Y            |                          |
| CNSR304012 | M      | 82  | LDLR | Hypercholesterolemia, familial, 1 | Large artery disease | NM_000527:exon11:c.T1592A;p.M531K | NA      | LP   |          |          | Y            |                          |
| CNSR304637 | F      | 70  | LDLR | Hypercholesterolemia, familial, 1 | Large artery disease | NM_000527:exon13:c.G1879A;p.A627T | P/LP    | VUS  |          | Y        |              |                          |
| CNSR304929 | M      | 79  | LDLR | Hypercholesterolemia, familial, 1 | Large artery disease | NM_000527:exon6:c.A924T;p.E308D   | LP      | VUS  |          |          | Y            |                          |
| CNSR305027 | F      | 64  | LDLR | Hypercholesterolemia, familial, 1 | Large artery disease | NM_000527:exon9:c.G1247A;p.R416Q  | P/LP    | VUS  | Y        |          |              |                          |
| CNSR305733 | M      | 59  | LDLR | Hypercholesterolemia, familial, 1 | Large artery disease | NM_000527:exon4:c.T400C;p.C134R   | P/LP    | VUS  |          |          | Y            |                          |
| CNSR306253 | M      | 83  | LDLR | Hypercholesterolemia, familial, 1 | Large artery disease | NM_000527:exon14:c.G2026C;p.G676R | LP      | VUS  | Y        |          |              |                          |
| CNSR306440 | M      | 62  | LDLR | Hypercholesterolemia, familial, 1 | Large artery disease | NM_000527:exon7:c.C1048T;p.R350X  | P       | LP   | Y        |          |              |                          |
| CNSR306967 | M      | 56  | LDLR | Hypercholesterolemia, familial, 1 | Large artery disease | NM_000527:exon7:c.G1049A;p.R350Q  | P       | VUS  |          |          | Y            |                          |
| CNSR307020 | F      | 52  | LDLR | Hypercholesterolemia, familial, 1 | Large artery disease | NM_001195798.2:c.313+1dup         | P/LP    | VUS  |          | Y        |              |                          |
| CNSR307426 | M      | 54  | LDLR | Hypercholesterolemia, familial, 1 | Large artery disease | NM_000527:exon9:c.G1247A;p.R416Q  | P/LP    | VUS  |          |          | Y            |                          |

eTable 3 Continued

| Code_n     | Gender | Age | Gene  | Phenotype                            | Etiology of stroke   | Mutation                                 | Clinvar | ACMG | Definite | Possible | Undetermined | Insufficient Information |
|------------|--------|-----|-------|--------------------------------------|----------------------|------------------------------------------|---------|------|----------|----------|--------------|--------------------------|
| CNSR307613 | F      | 71  | LDLR  | Hypercholesterolemia, familial, 1    | Large artery disease | NM_000527:exon14:c.G2026C;p.G676R        | LP      | VUS  | Y        |          |              |                          |
| CNSR307649 | M      | 49  | LDLR  | Hypercholesterolemia, familial, 1    | Large artery disease | NM_000527:exon12:c.1745_1746del:p.L582fs | P       | LP   | Y        |          |              |                          |
| CNSR307861 | M      | 66  | LDLR  | Hypercholesterolemia, familial, 1    | Large artery disease | NM_000527:exon10:c.1570_1582del:p.V524fs | NA      | LP   |          | Y        |              |                          |
| CNSR308053 | M      | 69  | LDLR  | Hypercholesterolemia, familial, 1    | Large artery disease | NM_000527:exon14:c.G2026C;p.G676R        | LP      | VUS  |          |          | Y            |                          |
| CNSR308235 | M      | 52  | LDLR  | Hypercholesterolemia, familial, 1    | Large artery disease | NM_000527:exon9:c.C1216A;p.R406R         | P       | VUS  | Y        |          |              |                          |
| CNSR308766 | M      | 61  | LDLR  | Hypercholesterolemia, familial, 1    | Large artery disease | NM_000527:exon4:c.G502A;p.D168N          | P/LP    | VUS  |          |          | Y            |                          |
| CNSR309242 | M      | 53  | LDLR  | Hypercholesterolemia, familial, 1    | Large artery disease | NM_000527:exon2:c.T100G;p.C34G           | P/LP    | VUS  |          |          | Y            |                          |
| CNSR309264 | M      | 42  | LDLR  | Hypercholesterolemia, familial, 1    | Large artery disease | NM_000527:exon5:c.G796C;p.D266H          | NA      | LP   |          | Y        |              |                          |
| CNSR309633 | M      | 69  | LDLR  | Hypercholesterolemia, familial, 1    | Large artery disease | NM_000527:exon6:c.908delG;p.R303fs       | NA      | LP   |          |          | Y            |                          |
| CNSR300114 | M      | 77  | MFAP5 | Aortic aneurysm, familial thoracic 9 | Large artery disease | NM_003480:exon3:c.C88T;p.R30X            | LP      | VUS  |          |          | Y            |                          |
| CNSR301352 | M      | 45  | MFAP5 | Aortic aneurysm, familial thoracic 9 | Large artery disease | NM_003480:exon10:c.C472T;p.R158X         | P       | VUS  |          |          | Y            |                          |
| CNSR301444 | M      | 41  | MFAP5 | Aortic aneurysm, familial thoracic 9 | Large artery disease | NM_003480:exon10:c.C472T;p.R158X         | P       | VUS  |          |          | Y            |                          |
| CNSR302503 | F      | 68  | MFAP5 | Aortic aneurysm, familial thoracic 9 | Large artery disease | NM_003480:exon10:c.C472T;p.R158X         | P       | VUS  |          |          | Y            |                          |

eTable 3 Continued

| Code_n     | Gender | Age | Gene  | Phenotype                            | Etiology of stroke   | Mutation                           | Clinvar | ACMG | Definite | Possible | Undetermined | Insufficient Information |
|------------|--------|-----|-------|--------------------------------------|----------------------|------------------------------------|---------|------|----------|----------|--------------|--------------------------|
| CNSR302574 | M      | 77  | MFAP5 | Aortic aneurysm, familial thoracic 9 | Large artery disease | NM_003480:exon10:c.C472T;p.R158X   | P       | VUS  |          |          | Y            |                          |
| CNSR303517 | F      | 65  | MFAP5 | Aortic aneurysm, familial thoracic 9 | Large artery disease | NM_003480:exon9:c.338dupT;p.L113fs | NA      | LP   |          |          | Y            |                          |
| CNSR305631 | M      | 65  | MFAP5 | Aortic aneurysm, familial thoracic 9 | Large artery disease | NM_003480:exon10:c.C472T;p.R158X   | P       | VUS  |          |          | Y            |                          |
| CNSR306162 | M      | 57  | MFAP5 | Aortic aneurysm, familial thoracic 9 | Large artery disease | NM_003480:exon10:c.C472T;p.R158X   | P       | VUS  |          |          | Y            |                          |
| CNSR306421 | F      | 53  | MFAP5 | Aortic aneurysm, familial thoracic 9 | Large artery disease | NM_003480:exon10:c.C472T;p.R158X   | P       | VUS  |          |          | Y            |                          |
| CNSR300828 | M      | 73  | MYH11 | Aortic aneurysm, familial thoracic 4 | Large artery disease | NM_002474:exon28:c.T3791A;p.L1264Q | NA      | LP   |          |          | Y            |                          |
| CNSR306393 | M      | 44  | MYH11 | Aortic aneurysm, familial thoracic 4 | Large artery disease | NM_002474:exon19:c.A2254T;p.K752X  | NA      | P    |          |          | Y            |                          |
| CNSR307728 | M      | 48  | MYH11 | Aortic aneurysm, familial thoracic 4 | Large artery disease | NM_002474:exon26:c.G3466T;p.E1156X | NA      | P    |          |          | Y            |                          |
| CNSR300206 | M      | 54  | MYLK  | Aortic aneurysm, familial thoracic 7 | Large artery disease | NM_053025:exon16:c.C2371T;p.Q791X  | NA      | P    |          |          | Y            |                          |
| CNSR302047 | F      | 73  | MYLK  | Aortic aneurysm, familial thoracic 7 | Large artery disease | NM_053025:exon18:c.2463-2A>G       | NA      | P    |          |          | Y            |                          |
| CNSR304181 | F      | 64  | MYLK  | Aortic aneurysm, familial thoracic 7 | Large artery disease | NM_053025:exon12:c.1517-2A>G       | NA      | P    |          |          | Y            |                          |
| CNSR305870 | F      | 61  | MYLK  | Aortic aneurysm, familial thoracic 7 | Large artery disease | NM_053025:exon18:c.C2692T;p.R898X  | NA      | P    |          |          | Y            |                          |

eTable 3 Continued

| Code_n     | Gender | Age | Gene  | Phenotype                            | Etiology of stroke   | Mutation                             | Clinvar | ACMG | Definite | Possible | Undetermined | Insufficient Information |
|------------|--------|-----|-------|--------------------------------------|----------------------|--------------------------------------|---------|------|----------|----------|--------------|--------------------------|
| CNSR307523 | F      | 67  | MYLK  | Aortic aneurysm, familial thoracic 7 | Large artery disease | NM_053025:exon14:c.C1915T;p.Q639X    | NA      | P    |          |          | Y            |                          |
| CNSR307730 | M      | 56  | MYLK  | Aortic aneurysm, familial thoracic 7 | Large artery disease | NM_053025:exon18:c.C2665T;p.Q889X    | NA      | P    |          |          | Y            |                          |
| CNSR309070 | M      | 61  | MYLK  | Aortic aneurysm, familial thoracic 7 | Large artery disease | NM_053025:exon6:c.422+1G>A           | NA      | P    |          |          | Y            |                          |
| CNSR309296 | M      | 58  | MYLK  | Aortic aneurysm, familial thoracic 7 | Large artery disease | NM_053025:exon10:c.1228dupG;p.D410fs | NA      | LP   |          |          | Y            |                          |
| CNSR300785 | M      | 76  | PRKG1 | Aortic aneurysm, familial thoracic 8 | Large artery disease | NM_006258:exon13:c.T1473A;p.H491Q    | NA      | LP   |          |          | Y            |                          |
| CNSR302491 | F      | 48  | PRKG1 | Aortic aneurysm, familial thoracic 8 | Large artery disease | NM_006258:exon2:c.A320G;p.D107G      | NA      | LP   |          |          | Y            |                          |
| CNSR303483 | M      | 72  | PRKG1 | Aortic aneurysm, familial thoracic 8 | Large artery disease | NM_006258:exon8:c.T962C;p.I321T      | NA      | LP   |          |          | Y            |                          |
| CNSR303769 | M      | 65  | PRKG1 | Aortic aneurysm, familial thoracic 8 | Large artery disease | NM_006258:exon2:c.A320G;p.D107G      | NA      | LP   |          |          | Y            |                          |
| CNSR304124 | F      | 58  | PRKG1 | Aortic aneurysm, familial thoracic 8 | Large artery disease | NM_006258:exon3:c.T541C;p.F181L      | NA      | LP   |          |          | Y            |                          |
| CNSR305284 | F      | 68  | PRKG1 | Aortic aneurysm, familial thoracic 8 | Large artery disease | NM_006258:exon8:c.T962C;p.I321T      | NA      | LP   |          |          | Y            |                          |
| CNSR305514 | F      | 80  | PRKG1 | Aortic aneurysm, familial thoracic 8 | Large artery disease | NM_006258:exon2:c.A350G;p.D117G      | NA      | LP   |          |          | Y            |                          |
| CNSR305685 | F      | 57  | PRKG1 | Aortic aneurysm, familial thoracic 8 | Large artery disease | NM_006258:exon3:c.T539C;p.V180A      | NA      | LP   |          |          | Y            |                          |
| CNSR306077 | F      | 65  | PRKG1 | Aortic aneurysm, familial thoracic 8 | Large artery disease | NM_006258:exon8:c.T962C;p.I321T      | NA      | LP   |          |          | Y            |                          |



eTable 3 Continued

| Code_n     | Gender | Age | Gene   | Phenotype                            | Etiology of stroke   | Mutation                               | Clinvar | ACMG | Definite | Possible | Undetermined | Insufficient Information |
|------------|--------|-----|--------|--------------------------------------|----------------------|----------------------------------------|---------|------|----------|----------|--------------|--------------------------|
| CNSR306372 | M      | 60  | PRKG1  | Aortic aneurysm, familial thoracic 8 | Large artery disease | NM_006258:exon2:c.G391A:p.V131M        | NA      | LP   |          |          | Y            |                          |
| CNSR307814 | M      | 60  | PRKG1  | Aortic aneurysm, familial thoracic 8 | Large artery disease | NM_006258:exon10:c.1128delC:p.N376fs   | NA      | LP   |          |          | Y            |                          |
| CNSR309202 | F      | 44  | PRKG1  | Aortic aneurysm, familial thoracic 8 | Large artery disease | NM_001098512:exon1:c.A257C:p.K86T      | NA      | LP   |          |          | Y            |                          |
| CNSR309352 | F      | 49  | PRKG1  | Aortic aneurysm, familial thoracic 8 | Large artery disease | NM_006258:exon2:c.A320G:p.D107G        | NA      | LP   |          | Y        |              |                          |
| CNSR300151 | M      | 61  | RNF213 | Moyamoya disease                     | Large artery disease | NM_001256071:exon60:c.G14429A:p.R4810K | P       | VUS  |          |          | Y            |                          |
| CNSR300449 | F      | 65  | RNF213 | Moyamoya disease                     | Large artery disease | NM_001256071:exon60:c.G14429A:p.R4810K | P       | VUS  |          |          | Y            |                          |
| CNSR300542 | M      | 65  | RNF213 | Moyamoya disease                     | Large artery disease | NM_001256071:exon60:c.G14429A:p.R4810K | P       | VUS  |          |          | Y            |                          |
| CNSR300570 | F      | 60  | RNF213 | Moyamoya disease                     | Large artery disease | NM_001256071:exon60:c.G14429A:p.R4810K | P       | VUS  |          |          | Y            |                          |
| CNSR300650 | M      | 71  | RNF213 | Moyamoya disease                     | Large artery disease | NM_001256071:exon60:c.G14429A:p.R4810K | P       | VUS  |          |          | Y            |                          |
| CNSR301176 | M      | 60  | RNF213 | Moyamoya disease                     | Large artery disease | NM_001256071:exon60:c.G14429A:p.R4810K | P       | VUS  |          | Y        |              |                          |
| CNSR301302 | M      | 66  | RNF213 | Moyamoya disease                     | Large artery disease | NM_001256071:exon60:c.G14429A:p.R4810K | P       | VUS  |          | Y        |              |                          |

eTable 3 Continued

| Code_n     | Gender | Age | Gene   | Phenotype        | Etiology of stroke   | Mutation                               | Clinvar | ACMG | Definite | Possible | Undetermined | Insufficient Information |
|------------|--------|-----|--------|------------------|----------------------|----------------------------------------|---------|------|----------|----------|--------------|--------------------------|
| CNSR301408 | M      | 70  | RNF213 | Moyamoya disease | Large artery disease | NM_001256071:exon60:c.G14429A:p.R4810K | P       | VUS  |          |          | Y            |                          |
| CNSR301446 | M      | 57  | RNF213 | Moyamoya disease | Large artery disease | NM_001256071:exon60:c.G14429A:p.R4810K | P       | VUS  |          |          | Y            |                          |
| CNSR301456 | F      | 46  | RNF213 | Moyamoya disease | Large artery disease | NM_001256071:exon60:c.G14429A:p.R4810K | P       | VUS  |          |          | Y            |                          |
| CNSR301695 | M      | 45  | RNF213 | Moyamoya disease | Large artery disease | NM_001256071:exon60:c.G14429A:p.R4810K | P       | VUS  |          | Y        |              |                          |
| CNSR301768 | M      | 62  | RNF213 | Moyamoya disease | Large artery disease | NM_001256071:exon60:c.G14429A:p.R4810K | P       | VUS  |          |          | Y            |                          |
| CNSR302170 | M      | 37  | RNF213 | Moyamoya disease | Large artery disease | NM_001256071:exon60:c.G14429A:p.R4810K | P       | VUS  |          |          |              | Y                        |
| CNSR302455 | F      | 27  | RNF213 | Moyamoya disease | Large artery disease | NM_001256071:exon60:c.G14429A:p.R4810K | P       | VUS  | Y        |          |              |                          |
| CNSR302619 | M      | 65  | RNF213 | Moyamoya disease | Large artery disease | NM_001256071:exon60:c.G14429A:p.R4810K | P       | VUS  |          |          | Y            |                          |
| CNSR302741 | F      | 67  | RNF213 | Moyamoya disease | Large artery disease | NM_001256071:exon60:c.G14429A:p.R4810K | P       | VUS  |          | Y        |              |                          |
| CNSR302775 | M      | 35  | RNF213 | Moyamoya disease | Large artery disease | NM_001256071:exon60:c.G14429A:p.R4810K | P       | VUS  | Y        |          |              |                          |

eTable 3 Continued

| Code_n     | Gender | Age | Gene   | Phenotype        | Etiology of stroke   | Mutation                               | Clinvar | ACMG | Definite | Possible | Undetermined | Insufficient Information |
|------------|--------|-----|--------|------------------|----------------------|----------------------------------------|---------|------|----------|----------|--------------|--------------------------|
| CNSR303338 | M      | 65  | RNF213 | Moyamoya disease | Large artery disease | NM_001256071:exon60:c.G14429A:p.R4810K | P       | VUS  |          |          | Y            |                          |
| CNSR303394 | M      | 54  | RNF213 | Moyamoya disease | Large artery disease | NM_001256071:exon60:c.G14429A:p.R4810K | P       | VUS  |          |          |              | Y                        |
| CNSR303404 | M      | 57  | RNF213 | Moyamoya disease | Large artery disease | NM_001256071:exon60:c.G14429A:p.R4810K | P       | VUS  |          |          | Y            |                          |
| CNSR303451 | F      | 53  | RNF213 | Moyamoya disease | Large artery disease | NM_001256071:exon60:c.G14429A:p.R4810K | P       | VUS  | Y        |          |              |                          |
| CNSR303695 | F      | 70  | RNF213 | Moyamoya disease | Large artery disease | NM_001256071:exon60:c.G14429A:p.R4810K | P       | VUS  |          | Y        |              |                          |
| CNSR304133 | F      | 54  | RNF213 | Moyamoya disease | Large artery disease | NM_001256071:exon60:c.G14429A:p.R4810K | P       | VUS  |          |          | Y            |                          |
| CNSR304137 | F      | 60  | RNF213 | Moyamoya disease | Large artery disease | NM_001256071:exon60:c.G14429A:p.R4810K | P       | VUS  |          |          | Y            |                          |
| CNSR304305 | M      | 61  | RNF213 | Moyamoya disease | Large artery disease | NM_001256071:exon60:c.G14429A:p.R4810K | P       | VUS  |          |          | Y            |                          |
| CNSR304368 | M      | 56  | RNF213 | Moyamoya disease | Large artery disease | NM_001256071:exon60:c.G14429A:p.R4810K | P       | VUS  |          |          | Y            |                          |
| CNSR304370 | M      | 67  | RNF213 | Moyamoya disease | Large artery disease | NM_001256071:exon60:c.G14429A:p.R4810K | P       | VUS  |          |          | Y            |                          |

eTable 3 Continued

| Code_n     | Gender | Age | Gene   | Phenotype        | Etiology of stroke   | Mutation                               | Clinvar | ACMG | Definite | Possible | Undetermined | Insufficient Information |
|------------|--------|-----|--------|------------------|----------------------|----------------------------------------|---------|------|----------|----------|--------------|--------------------------|
| CNSR304477 | M      | 69  | RNF213 | Moyamoya disease | Large artery disease | NM_001256071:exon60:c.G14429A:p.R4810K | P       | VUS  |          |          |              | Y                        |
| CNSR304840 | M      | 30  | RNF213 | Moyamoya disease | Large artery disease | NM_001256071:exon60:c.G14429A:p.R4810K | P       | VUS  | Y        |          |              |                          |
| CNSR305285 | M      | 52  | RNF213 | Moyamoya disease | Large artery disease | NM_001256071:exon60:c.G14429A:p.R4810K | P       | VUS  |          |          | Y            |                          |
| CNSR305511 | M      | 45  | RNF213 | Moyamoya disease | Large artery disease | NM_001256071:exon60:c.G14429A:p.R4810K | P       | VUS  |          |          | Y            |                          |
| CNSR305688 | F      | 51  | RNF213 | Moyamoya disease | Large artery disease | NM_001256071:exon60:c.G14429A:p.R4810K | P       | VUS  |          |          | Y            |                          |
| CNSR305701 | F      | 58  | RNF213 | Moyamoya disease | Large artery disease | NM_001256071:exon60:c.G14429A:p.R4810K | P       | VUS  |          |          | Y            |                          |
| CNSR305969 | F      | 67  | RNF213 | Moyamoya disease | Large artery disease | NM_001256071:exon60:c.G14429A:p.R4810K | P       | VUS  | Y        |          |              |                          |
| CNSR306018 | M      | 79  | RNF213 | Moyamoya disease | Large artery disease | NM_001256071:exon60:c.G14429A:p.R4810K | P       | VUS  |          |          | Y            |                          |
| CNSR306251 | F      | 48  | RNF213 | Moyamoya disease | Large artery disease | NM_001256071:exon60:c.G14429A:p.R4810K | P       | VUS  | Y        |          |              |                          |
| CNSR306474 | M      | 51  | RNF213 | Moyamoya disease | Large artery disease | NM_001256071:exon60:c.G14429A:p.R4810K | P       | VUS  |          |          |              | Y                        |

eTable 3 Continued

| Code_n     | Gender | Age | Gene   | Phenotype        | Etiology of stroke   | Mutation                               | Clinvar | ACMG | Definite | Possible | Undetermined | Insufficient Information |
|------------|--------|-----|--------|------------------|----------------------|----------------------------------------|---------|------|----------|----------|--------------|--------------------------|
| CNSR306719 | F      | 56  | RNF213 | Moyamoya disease | Large artery disease | NM_001256071:exon60:c.G14429A:p.R4810K | P       | VUS  |          |          | Y            |                          |
| CNSR307009 | F      | 65  | RNF213 | Moyamoya disease | Large artery disease | NM_001256071:exon60:c.G14429A:p.R4810K | P       | VUS  |          |          |              | Y                        |
| CNSR307043 | M      | 62  | RNF213 | Moyamoya disease | Large artery disease | NM_001256071:exon60:c.G14429A:p.R4810K | P       | VUS  |          |          | Y            |                          |
| CNSR307110 | M      | 62  | RNF213 | Moyamoya disease | Large artery disease | NM_001256071:exon60:c.G14429A:p.R4810K | P       | VUS  |          |          | Y            |                          |
| CNSR307307 | M      | 72  | RNF213 | Moyamoya disease | Large artery disease | NM_001256071:exon60:c.G14429A:p.R4810K | P       | VUS  |          |          | Y            |                          |
| CNSR307323 | M      | 66  | RNF213 | Moyamoya disease | Large artery disease | NM_001256071:exon60:c.G14429A:p.R4810K | P       | VUS  |          |          | Y            |                          |
| CNSR307418 | F      | 68  | RNF213 | Moyamoya disease | Large artery disease | NM_001256071:exon60:c.G14429A:p.R4810K | P       | VUS  |          | Y        |              |                          |
| CNSR307541 | F      | 61  | RNF213 | Moyamoya disease | Large artery disease | NM_001256071:exon60:c.G14429A:p.R4810K | P       | VUS  |          |          | Y            |                          |
| CNSR308107 | M      | 51  | RNF213 | Moyamoya disease | Large artery disease | NM_001256071:exon60:c.G14429A:p.R4810K | P       | VUS  |          |          | Y            |                          |
| CNSR308482 | M      | 53  | RNF213 | Moyamoya disease | Large artery disease | NM_001256071:exon60:c.G14429A:p.R4810K | P       | VUS  |          |          | Y            |                          |

eTable 3 Continued

| Code_n     | Gender | Age | Gene   | Phenotype          | Etiology of stroke   | Mutation                               | Clinvar | ACMG | Definite | Possible | Undetermined | Insufficient Information |
|------------|--------|-----|--------|--------------------|----------------------|----------------------------------------|---------|------|----------|----------|--------------|--------------------------|
| CNSR308599 | M      | 59  | RNF213 | Moyamoya disease   | Large artery disease | NM_001256071:exon60:c.G14429A:p.R4810K | P       | VUS  |          |          | Y            |                          |
| CNSR308643 | M      | 60  | RNF213 | Moyamoya disease   | Large artery disease | NM_001256071:exon60:c.G14429A:p.R4810K | P       | VUS  |          |          | Y            |                          |
| CNSR308924 | F      | 44  | RNF213 | Moyamoya disease   | Large artery disease | NM_001256071:exon60:c.G14429A:p.R4810K | P       | VUS  | Y        |          |              |                          |
| CNSR309034 | M      | 58  | RNF213 | Moyamoya disease   | Large artery disease | NM_001256071:exon60:c.G14429A:p.R4810K | P       | VUS  |          |          | Y            |                          |
| CNSR309437 | F      | 51  | RNF213 | Moyamoya disease   | Large artery disease | NM_001256071:exon60:c.G14429A:p.R4810K | P       | VUS  |          | Y        |              |                          |
| CNSR309554 | F      | 53  | RNF213 | Moyamoya disease   | Large artery disease | NM_001256071:exon60:c.G14429A:p.R4810K | P       | VUS  |          |          | Y            |                          |
| CNSR309631 | M      | 62  | RNF213 | Moyamoya disease   | Large artery disease | NM_001256071:exon60:c.G14429A:p.R4810K | P       | VUS  | Y        |          |              |                          |
| CNSR310183 | M      | 41  | RNF213 | Moyamoya disease   | Large artery disease | NM_001256071:exon60:c.G14429A:p.R4810K | P       | VUS  |          | Y        |              |                          |
| CNSR310309 | M      | 51  | RNF213 | Moyamoya disease   | Large artery disease | NM_001256071:exon60:c.G14429A:p.R4810K | P       | VUS  |          |          | Y            |                          |
| CNSR303114 | M      | 71  | ETV6   | Thrombocytopenia 5 | Prothrombotic state  | NM_001987:exon2:c.C115T:p.R39X         | NA      | P    |          |          | Y            |                          |

eTable 3 Continued

| Code_n     | Gender | Age | Gene | Phenotype                            | Etiology of stroke  | Mutation                          | Clinvar | ACMG | Definite | Possible | Undetermined | Insufficient Information |
|------------|--------|-----|------|--------------------------------------|---------------------|-----------------------------------|---------|------|----------|----------|--------------|--------------------------|
| CNSR300244 | F      | 60  | F2   | Thrombophilia due to thrombin defect | Prothrombotic state | NM_000506:exon10:c.C1195T;p.R399C | NA      | LP   |          |          | Y            |                          |
| CNSR300779 | M      | 60  | F2   | Thrombophilia due to thrombin defect | Prothrombotic state | NM_000506:exon13:c.G1679A;p.R560Q | NA      | LP   |          |          | Y            |                          |
| CNSR301431 | M      | 49  | F2   | Thrombophilia due to thrombin defect | Prothrombotic state | NM_000506:exon4:c.G290A;p.R97Q    | NA      | LP   |          |          | Y            |                          |
| CNSR302043 | M      | 75  | F2   | Thrombophilia due to thrombin defect | Prothrombotic state | NM_000506:exon7:c.A715G;p.S239G   | NA      | LP   |          |          | Y            |                          |
| CNSR302610 | F      | 62  | F2   | Thrombophilia due to thrombin defect | Prothrombotic state | NM_000506:exon7:c.A715G;p.S239G   | NA      | LP   |          |          | Y            |                          |
| CNSR302706 | M      | 65  | F2   | Thrombophilia due to thrombin defect | Prothrombotic state | NM_000506:exon4:c.G290A;p.R97Q    | NA      | LP   |          |          | Y            |                          |
| CNSR302815 | F      | 64  | F2   | Thrombophilia due to thrombin defect | Prothrombotic state | NM_000506:exon7:c.C683T;p.T228I   | NA      | LP   |          |          | Y            |                          |
| CNSR302834 | M      | 54  | F2   | Thrombophilia due to thrombin defect | Prothrombotic state | NM_000506:exon11:c.G1307A;p.R436Q | NA      | LP   |          |          | Y            |                          |
| CNSR303002 | M      | 53  | F2   | Thrombophilia due to thrombin defect | Prothrombotic state | NM_000506:exon4:c.G290A;p.R97Q    | NA      | LP   |          |          | Y            |                          |
| CNSR303616 | M      | 70  | F2   | Thrombophilia due to thrombin defect | Prothrombotic state | NM_000506:exon7:c.A715G;p.S239G   | NA      | LP   |          |          | Y            |                          |
| CNSR303837 | M      | 68  | F2   | Thrombophilia due to thrombin defect | Prothrombotic state | NM_000506:exon2:c.A136G;p.T46A    | NA      | LP   |          |          | Y            |                          |
| CNSR304831 | M      | 45  | F2   | Thrombophilia due to thrombin defect | Prothrombotic state | NM_000506:exon4:c.G290A;p.R97Q    | NA      | LP   |          |          | Y            |                          |
| CNSR304932 | M      | 64  | F2   | Thrombophilia due to thrombin defect | Prothrombotic state | NM_000506:exon10:c.G1196T;p.R399L | NA      | LP   |          |          | Y            |                          |

eTable 3 Continued

| Code_n     | Gender | Age | Gene | Phenotype                            | Etiology of stroke  | Mutation                                   | Clinvar | ACMG | Definite | Possible | Undetermined | Insufficient Information |
|------------|--------|-----|------|--------------------------------------|---------------------|--------------------------------------------|---------|------|----------|----------|--------------|--------------------------|
| CNSR305605 | M      | 66  | F2   | Thrombophilia due to thrombin defect | Prothrombotic state | NM_000506:exon4:c.G290A:p.R97Q             | NA      | LP   |          |          | Y            |                          |
| CNSR306073 | M      | 51  | F2   | Thrombophilia due to thrombin defect | Prothrombotic state | NM_000506:exon7:c.A715G:p.S239G            | NA      | LP   |          | Y        |              |                          |
| CNSR306469 | M      | 69  | F2   | Thrombophilia due to thrombin defect | Prothrombotic state | NM_000506:exon7:c.C677A:p.A226E            | NA      | LP   |          |          | Y            |                          |
| CNSR306519 | F      | 71  | F2   | Thrombophilia due to thrombin defect | Prothrombotic state | NM_000506:exon11:c.G1299T:p.R433S          | NA      | LP   |          |          | Y            |                          |
| CNSR306646 | F      | 81  | F2   | Thrombophilia due to thrombin defect | Prothrombotic state | NM_000506:exon5:c.419_420insTGA G:p.P140fs | NA      | LP   |          |          | Y            |                          |
| CNSR306759 | M      | 44  | F2   | Thrombophilia due to thrombin defect | Prothrombotic state | NM_000506:exon11:c.G1299T:p.R433S          | NA      | LP   |          |          | Y            |                          |
| CNSR307305 | M      | 45  | F2   | Thrombophilia due to thrombin defect | Prothrombotic state | NM_000506:exon11:c.C1306T:p.R436X          | NA      | P    |          |          | Y            |                          |
| CNSR307437 | M      | 82  | F2   | Thrombophilia due to thrombin defect | Prothrombotic state | NM_000506:exon2:c.G119A:p.R40Q             | NA      | LP   |          |          | Y            |                          |
| CNSR307824 | M      | 76  | F2   | Thrombophilia due to thrombin defect | Prothrombotic state | NM_000506:exon9:c.G1054A:p.E352K           | P       | LP   |          |          | Y            |                          |
| CNSR307908 | M      | 58  | F2   | Thrombophilia due to thrombin defect | Prothrombotic state | NM_000506:exon10:c.C1147T:p.R383W          | NA      | LP   |          |          | Y            |                          |
| CNSR308145 | F      | 74  | F2   | Thrombophilia due to thrombin defect | Prothrombotic state | NM_000506:exon4:c.G290A:p.R97Q             | NA      | LP   |          |          | Y            |                          |
| CNSR308905 | M      | 56  | F2   | Thrombophilia due to thrombin defect | Prothrombotic state | NM_000506:exon7:c.A715G:p.S239G            | NA      | LP   |          |          | Y            |                          |
| CNSR308999 | M      | 62  | F2   | Thrombophilia due to thrombin defect | Prothrombotic state | NM_000506:exon8:c.G1003A:p.D335N           | NA      | LP   |          |          | Y            |                          |



eTable 3 Continued

| Code_n     | Gender | Age | Gene  | Phenotype                             | Etiology of stroke  | Mutation                          | Clinvar | ACMG | Definite | Possible | Undetermined | Insufficient Information |
|------------|--------|-----|-------|---------------------------------------|---------------------|-----------------------------------|---------|------|----------|----------|--------------|--------------------------|
| CNSR309128 | M      | 52  | F2    | Thrombophilia due to thrombin defect  | Prothrombotic state | NM_000506:exon11:c.G1299T;p.R433S | NA      | LP   |          |          | Y            |                          |
| CNSR310389 | M      | 53  | F2    | Thrombophilia due to thrombin defect  | Prothrombotic state | NM_000506:exon7:c.A715G;p.S239G   | NA      | LP   |          |          | Y            |                          |
| CNSR310428 | M      | 60  | F2    | Thrombophilia due to thrombin defect  | Prothrombotic state | NM_000506:exon2:c.C239T;p.T80M    | NA      | LP   |          |          | Y            |                          |
| CNSR301130 | F      | 87  | GP1BA | von Willebrand disease, platelet-type | Prothrombotic state | NM_000173:exon2:c.A449G;p.N150S   | LP      | VUS  |          |          | Y            |                          |
| CNSR300210 | M      | 54  | JAK2  | Thrombocytopenia 3                    | Prothrombotic state | NM_004972:exon14:c.G1849T;p.V617F | P       | VUS  | Y        |          |              |                          |
| CNSR300974 | F      | 61  | JAK2  | Thrombocytopenia 3                    | Prothrombotic state | NM_004972:exon14:c.G1849T;p.V617F | P       | VUS  | Y        |          |              |                          |
| CNSR301140 | F      | 67  | JAK2  | Thrombocytopenia 3                    | Prothrombotic state | NM_004972:exon14:c.G1849T;p.V617F | P       | VUS  | Y        |          |              |                          |
| CNSR301453 | M      | 74  | JAK2  | Thrombocytopenia 3                    | Prothrombotic state | NM_004972:exon14:c.G1849T;p.V617F | P       | VUS  | Y        |          |              |                          |
| CNSR301596 | M      | 81  | JAK2  | Thrombocytopenia 3                    | Prothrombotic state | NM_004972:exon14:c.G1849T;p.V617F | P       | VUS  | Y        |          |              |                          |
| CNSR301724 | F      | 53  | JAK2  | Thrombocytopenia 3                    | Prothrombotic state | NM_004972:exon14:c.G1849T;p.V617F | P       | VUS  | Y        |          |              |                          |
| CNSR301871 | M      | 70  | JAK2  | Thrombocytopenia 3                    | Prothrombotic state | NM_004972:exon14:c.G1849T;p.V617F | P       | VUS  | Y        |          |              |                          |

eTable 3 Continued

| Code_n     | Gender | Age | Gene | Phenotype          | Etiology of stroke  | Mutation                          | Clinvar | ACMG | Definite | Possible | Undetermined | Insufficient Information |
|------------|--------|-----|------|--------------------|---------------------|-----------------------------------|---------|------|----------|----------|--------------|--------------------------|
| CNSR302013 | F      | 62  | JAK2 | Thrombocytopenia 3 | Prothrombotic state | NM_004972:exon14:c.G1849T;p.V617F | P       | VUS  | Y        |          |              |                          |
| CNSR302241 | M      | 76  | JAK2 | Thrombocytopenia 3 | Prothrombotic state | NM_004972:exon14:c.G1849T;p.V617F | P       | VUS  | Y        |          |              |                          |
| CNSR302246 | F      | 43  | JAK2 | Thrombocytopenia 3 | Prothrombotic state | NM_004972:exon14:c.G1849T;p.V617F | P       | VUS  | Y        |          |              |                          |
| CNSR302755 | F      | 59  | JAK2 | Thrombocytopenia 3 | Prothrombotic state | NM_004972:exon14:c.G1849T;p.V617F | P       | VUS  | Y        |          |              |                          |
| CNSR302832 | M      | 63  | JAK2 | Thrombocytopenia 3 | Prothrombotic state | NM_004972:exon14:c.G1849T;p.V617F | P       | VUS  | Y        |          |              |                          |
| CNSR302950 | F      | 60  | JAK2 | Thrombocytopenia 3 | Prothrombotic state | NM_004972:exon14:c.G1849T;p.V617F | P       | VUS  | Y        |          |              |                          |
| CNSR303845 | M      | 61  | JAK2 | Thrombocytopenia 3 | Prothrombotic state | NM_004972:exon14:c.G1849T;p.V617F | P       | VUS  | Y        |          |              |                          |
| CNSR303914 | F      | 51  | JAK2 | Thrombocytopenia 3 | Prothrombotic state | NM_004972:exon14:c.G1849T;p.V617F | P       | VUS  | Y        |          |              |                          |
| CNSR304686 | M      | 64  | JAK2 | Thrombocytopenia 3 | Prothrombotic state | NM_004972:exon14:c.G1849T;p.V617F | P       | VUS  | Y        |          |              |                          |
| CNSR306131 | F      | 76  | JAK2 | Thrombocytopenia 3 | Prothrombotic state | NM_004972:exon14:c.G1849T;p.V617F | P       | VUS  | Y        |          |              |                          |

eTable 3 Continued

| Code_n     | Gender | Age | Gene | Phenotype          | Etiology of stroke  | Mutation                          | Clinvar | ACMG | Definite | Possible | Undetermined | Insufficient Information |
|------------|--------|-----|------|--------------------|---------------------|-----------------------------------|---------|------|----------|----------|--------------|--------------------------|
| CNSR306885 | M      | 65  | JAK2 | Thrombocytopenia 3 | Prothrombotic state | NM_004972:exon14:c.G1849T;p.V617F | P       | VUS  | Y        |          |              |                          |
| CNSR306975 | M      | 53  | JAK2 | Thrombocytopenia 3 | Prothrombotic state | NM_004972:exon14:c.G1849T;p.V617F | P       | VUS  | Y        |          |              |                          |
| CNSR306992 | F      | 62  | JAK2 | Thrombocytopenia 3 | Prothrombotic state | NM_004972:exon14:c.G1849T;p.V617F | P       | VUS  | Y        |          |              |                          |
| CNSR307039 | M      | 66  | JAK2 | Thrombocytopenia 3 | Prothrombotic state | NM_004972:exon14:c.G1849T;p.V617F | P       | VUS  | Y        |          |              |                          |
| CNSR307258 | M      | 73  | JAK2 | Thrombocytopenia 3 | Prothrombotic state | NM_004972:exon14:c.G1849T;p.V617F | P       | VUS  | Y        |          |              |                          |
| CNSR307566 | F      | 62  | JAK2 | Thrombocytopenia 3 | Prothrombotic state | NM_004972:exon14:c.G1849T;p.V617F | P       | VUS  | Y        |          |              |                          |
| CNSR308276 | M      | 67  | JAK2 | Thrombocytopenia 3 | Prothrombotic state | NM_004972:exon14:c.G1849T;p.V617F | P       | VUS  | Y        |          |              |                          |
| CNSR308823 | M      | 67  | JAK2 | Thrombocytopenia 3 | Prothrombotic state | NM_004972:exon14:c.G1849T;p.V617F | P       | VUS  |          |          | Y            |                          |
| CNSR308929 | M      | 79  | JAK2 | Thrombocytopenia 3 | Prothrombotic state | NM_004972:exon14:c.G1849T;p.V617F | P       | VUS  |          |          | Y            |                          |
| CNSR309106 | M      | 77  | JAK2 | Thrombocytopenia 3 | Prothrombotic state | NM_004972:exon14:c.G1849T;p.V617F | P       | VUS  | Y        |          |              |                          |

eTable 3 Continued

| Code_n     | Gender | Age | Gene  | Phenotype                                        | Etiology of stroke  | Mutation                          | Clinvar | ACMG | Definite | Possible | Undetermined | Insufficient Information |
|------------|--------|-----|-------|--------------------------------------------------|---------------------|-----------------------------------|---------|------|----------|----------|--------------|--------------------------|
| CNSR309615 | F      | 79  | JAK2  | Thrombocytopenia 3                               | Prothrombotic state | NM_004972:exon14:c.G1849T;p.V617F | P       | VUS  |          |          | Y            |                          |
| CNSR309872 | M      | 75  | JAK2  | Thrombocytopenia 3                               | Prothrombotic state | NM_004972:exon14:c.G1849T;p.V617F | P       | VUS  | Y        |          |              |                          |
| CNSR310420 | M      | 69  | JAK2  | Thrombocytopenia 3                               | Prothrombotic state | NM_004972:exon14:c.G1849T;p.V617F | P       | VUS  | Y        |          |              |                          |
| CNSR305210 | M      | 58  | PROC  | Thrombophilia due to protein C deficiency, autos | Prothrombotic state | NM_000312:exon9:c.G889C;p.D297H   | P       | VUS  |          |          | Y            |                          |
| CNSR306872 | F      | 64  | PROC  | Thrombophilia due to protein C deficiency, autos | Prothrombotic state | NM_000312:exon3:c.G199C;p.E67Q    | NA      | LP   |          |          | Y            |                          |
| CNSR307697 | M      | 58  | PROC  | Thrombophilia due to protein C deficiency, autos | Prothrombotic state | NM_000312:c.678+9C>T              | P       | VUS  |          |          | Y            |                          |
| CNSR307931 | M      | 29  | PROC  | Thrombophilia due to protein C deficiency, autos | Prothrombotic state | NM_000312:exon7:c.C658T;p.R220W   | P       | VUS  |          |          | Y            |                          |
| CNSR309298 | F      | 64  | PROC  | Thrombophilia due to protein C deficiency, autos | Prothrombotic state | NM_000312:exon3:c.G76C;p.V26L     | NA      | LP   |          |          | Y            |                          |
| CNSR310362 | M      | 74  | PROC  | Thrombophilia due to protein C deficiency, autos | Prothrombotic state | NM_000312:exon9:c.G889C;p.D297H   | P       | VUS  |          |          | Y            |                          |
| CNSR303734 | M      | 40  | PROS1 | Thrombophilia due to protein S deficiency        | Prothrombotic state | NM_000313:exon10:c.C1063T;p.R355C | P       | VUS  |          |          | Y            |                          |

eTable 3 Continued

| Code_n     | Gender | Age | Gene     | Phenotype                                        | Etiology of stroke  | Mutation                                  | Clinvar | ACMG | Definite | Possible | Undetermined | Insufficient Information |
|------------|--------|-----|----------|--------------------------------------------------|---------------------|-------------------------------------------|---------|------|----------|----------|--------------|--------------------------|
| CNSR303874 | M      | 48  | PROS1    | Thrombophilia due to protein S deficiency        | Prothrombotic state | NM_000313:exon6:c.A586G;p.K196E           | P       | VUS  |          |          | Y            |                          |
| CNSR304216 | M      | 65  | PROS1    | Thrombophilia due to protein S deficiency        | Prothrombotic state | NM_000313:exon14:c.T1680A;p.Y560X         | LP      | LP   |          |          | Y            |                          |
| CNSR304306 | F      | 61  | PROS1    | Thrombophilia due to protein S deficiency        | Prothrombotic state | NM_000313:exon10:c.C1063T;p.R355C         | P       | VUS  |          |          | Y            |                          |
| CNSR305014 | F      | 67  | PROS1    | Thrombophilia due to protein S deficiency        | Prothrombotic state | NM_000313:exon10:c.C1063T;p.R355C         | P       | VUS  |          |          | Y            |                          |
| CNSR307585 | M      | 56  | PROS1    | Thrombophilia due to protein S deficiency        | Prothrombotic state | NM_000313:exon14:c.1753delG;p.E585fs      | NA      | LP   |          |          | Y            |                          |
| CNSR307679 | M      | 63  | PROS1    | Thrombophilia due to protein S deficiency        | Prothrombotic state | NM_000313:exon10:c.C1063T;p.R355C         | P       | VUS  |          |          | Y            |                          |
| CNSR308628 | F      | 59  | PROS1    | Thrombophilia due to protein S deficiency        | Prothrombotic state | NM_000313:exon12:c.1427_1428insA;p.L476fs | NA      | LP   |          |          | Y            |                          |
| CNSR300805 | M      | 53  | SERPINC1 | Thrombophilia due to antithrombin III deficiency | Prothrombotic state | NM_000488:exon2:c.C218T;p.P73L            | P/LP    | VUS  |          |          | Y            |                          |
| CNSR301590 | M      | 70  | SERPINC1 | Thrombophilia due to antithrombin III deficiency | Prothrombotic state | NM_000488:exon3:c.T442C;p.S148P           | P       | VUS  |          |          | Y            |                          |
| CNSR305745 | M      | 71  | SERPINC1 | Thrombophilia due to antithrombin III deficiency | Prothrombotic state | NM_000488:exon3:c.T442C;p.S148P           | P       | VUS  |          |          | Y            |                          |

eTable 3 Continued

| Code_n     | Gender | Age | Gene     | Phenotype                                           | Etiology of stroke  | Mutation                                    | Clinvar | ACMG | Definite | Possible | Undetermined | Insufficient Information |
|------------|--------|-----|----------|-----------------------------------------------------|---------------------|---------------------------------------------|---------|------|----------|----------|--------------|--------------------------|
| CNSR305890 | F      | 41  | SERPINC1 | Thrombophilia due to antithrombin III deficiency    | Prothrombotic state | NM_000488:exon3:c.A572G:p.Q191R             | LP      | VUS  |          |          | Y            |                          |
| CNSR306312 | M      | 50  | SERPINC1 | Thrombophilia due to antithrombin III deficiency    | Prothrombotic state | NM_000488:exon2:c.C235T:p.R79C              | LP      | VUS  |          |          | Y            |                          |
| CNSR309720 | M      | 60  | SERPINC1 | Thrombophilia due to antithrombin III deficiency    | Prothrombotic state | NM_000488:exon3:c.A572G:p.Q191R             | LP      | VUS  |          |          | Y            |                          |
| CNSR300699 | F      | 69  | SERPIND1 | Thrombophilia due to heparin cofactor II deficiency | Prothrombotic state | NM_000185:exon2:c.657_660del:p.R219fs       | NA      | LP   |          |          | Y            |                          |
| CNSR302505 | M      | 54  | SERPIND1 | Thrombophilia due to heparin cofactor II deficiency | Prothrombotic state | NM_000185:exon2:c.C415T:p.R139X             | NA      | P    |          |          | Y            |                          |
| CNSR304069 | M      | 62  | SERPIND1 | Thrombophilia due to heparin cofactor II deficiency | Prothrombotic state | NM_000185:exon2:c.556_557del:p.F186fs       | NA      | LP   |          |          | Y            |                          |
| CNSR305242 | F      | 70  | SERPIND1 | Thrombophilia due to heparin cofactor II deficiency | Prothrombotic state | NM_000185:exon3:c.949_950del:p.E317fs       | NA      | LP   |          |          | Y            |                          |
| CNSR307508 | M      | 55  | SERPIND1 | Thrombophilia due to heparin cofactor II deficiency | Prothrombotic state | NM_000185:exon3:c.917delA:p.E306fs          | NA      | LP   |          |          | Y            |                          |
| CNSR309254 | M      | 66  | SERPIND1 | Thrombophilia due to heparin cofactor II deficiency | Prothrombotic state | NM_000185:exon2:c.668_677del:p.D223fs       | NA      | LP   |          |          | Y            |                          |
| CNSR305747 | M      | 62  | STIM1    | Stormorken syndrome                                 | Prothrombotic state | NM_001277961:exon11:c.1621_1624del:p.S541fs | NA      | LP   |          |          | Y            |                          |

eTable 3 Continued

| Code_n     | Gender | Age | Gene | Phenotype                      | Etiology of stroke  | Mutation                           | Clinvar | ACMG | Definite | Possible | Undetermined | Insufficient Information |
|------------|--------|-----|------|--------------------------------|---------------------|------------------------------------|---------|------|----------|----------|--------------|--------------------------|
| CNSR300050 | M      | 60  | VWF  | von Willebrand disease, type 1 | Prothrombotic state | NM_000552:exon18:c.G2303A:p.R768Q  | LP      | VUS  |          |          | Y            |                          |
| CNSR300111 | M      | 59  | VWF  | von Willebrand disease, type 1 | Prothrombotic state | NM_000552:exon18:c.2289dupG:p.S764 | NA      | LP   |          |          | Y            |                          |
| CNSR300534 | M      | 68  | VWF  | von Willebrand disease, type 1 | Prothrombotic state | NM_000552:exon14:c.C1677A:p.C559X  | NA      | LP   |          |          | Y            |                          |
| CNSR300609 | F      | 74  | VWF  | von Willebrand disease, type 1 | Prothrombotic state | NM_000552:exon18:c.G2303A:p.R768Q  | LP      | VUS  |          |          | Y            |                          |
| CNSR300627 | F      | 67  | VWF  | von Willebrand disease, type 1 | Prothrombotic state | NM_000552:exon28:c.C4135T:p.R1379C | P       | VUS  |          |          | Y            |                          |
| CNSR301287 | M      | 48  | VWF  | von Willebrand disease, type 1 | Prothrombotic state | NM_000552:exon18:c.G2303A:p.R768Q  | LP      | VUS  |          |          | Y            |                          |
| CNSR301361 | M      | 62  | VWF  | von Willebrand disease, type 1 | Prothrombotic state | NM_000552:exon32:c.5462delC:p.T182 | NA      | LP   |          |          | Y            |                          |
| CNSR301580 | M      | 74  | VWF  | von Willebrand disease, type 1 | Prothrombotic state | NM_000552:exon28:c.C4696T:p.R1566X | P       | P    |          |          | Y            |                          |
| CNSR301972 | M      | 66  | VWF  | von Willebrand disease, type 1 | Prothrombotic state | NM_000552:exon18:c.G2303A:p.R768Q  | LP      | VUS  |          |          | Y            |                          |
| CNSR302390 | M      | 54  | VWF  | von Willebrand disease, type 1 | Prothrombotic state | NM_000552:exon43:c.C7390T:p.R2464C | P/LP    | VUS  |          |          | Y            |                          |

eTable 3 Continued

| Code_n     | Gender | Age | Gene | Phenotype                      | Etiology of stroke  | Mutation                           | Clinvar | ACMG | Definite | Possible | Undetermined | Insufficient Information |
|------------|--------|-----|------|--------------------------------|---------------------|------------------------------------|---------|------|----------|----------|--------------|--------------------------|
| CNSR302557 | F      | 67  | VWF  | von Willebrand disease, type 1 | Prothrombotic state | NM_000552:exon18:c.G2303A:p.R768Q  | LP      | VUS  |          |          | Y            |                          |
| CNSR303068 | M      | 73  | VWF  | von Willebrand disease, type 1 | Prothrombotic state | NM_000552:exon28:c.C3797A:p.P1266Q | LP      | VUS  |          |          | Y            |                          |
| CNSR303106 | M      | 60  | VWF  | von Willebrand disease, type 1 | Prothrombotic state | NM_000552:exon18:c.G2303A:p.R768Q  | LP      | VUS  |          |          | Y            |                          |
| CNSR303246 | F      | 64  | VWF  | von Willebrand disease, type 1 | Prothrombotic state | NM_000552:exon18:c.C2372T:p.T791M  | LP      | VUS  |          |          | Y            |                          |
| CNSR303642 | M      | 64  | VWF  | von Willebrand disease, type 1 | Prothrombotic state | NM_000552:exon18:c.G2303A:p.R768Q  | LP      | VUS  |          |          | Y            |                          |
| CNSR303701 | M      | 77  | VWF  | von Willebrand disease, type 1 | Prothrombotic state | NM_000552:exon18:c.G2303A:p.R768Q  | LP      | VUS  |          |          | Y            |                          |
| CNSR303871 | M      | 63  | VWF  | von Willebrand disease, type 1 | Prothrombotic state | NM_000552:exon44:c.C7464T:p.G2488G | LP      | VUS  |          |          | Y            |                          |
| CNSR304193 | M      | 68  | VWF  | von Willebrand disease, type 1 | Prothrombotic state | NM_000552:exon18:c.G2303A:p.R768Q  | LP      | VUS  |          |          | Y            |                          |
| CNSR304338 | F      | 57  | VWF  | von Willebrand disease, type 1 | Prothrombotic state | NM_000552:exon28:c.C3797A:p.P1266Q | LP      | VUS  |          |          | Y            |                          |
| CNSR304493 | M      | 64  | VWF  | von Willebrand disease, type 1 | Prothrombotic state | NM_000552:exon18:c.G2303A:p.R768Q  | LP      | VUS  |          |          | Y            |                          |



eTable 3 Continued

| Code_n     | Gender | Age | Gene | Phenotype                      | Etiology of stroke  | Mutation                             | Clinvar | ACMG | Definite | Possible | Undetermined | Insufficient Information |
|------------|--------|-----|------|--------------------------------|---------------------|--------------------------------------|---------|------|----------|----------|--------------|--------------------------|
| CNSR304667 | M      | 52  | VWF  | von Willebrand disease, type 1 | Prothrombotic state | NM_000552:exon18:c.G2303A:p.R768Q    | LP      | VUS  |          |          | Y            |                          |
| CNSR304733 | M      | 75  | VWF  | von Willebrand disease, type 1 | Prothrombotic state | NM_000552:exon20:c.2658delC:p.P886fs | NA      | LP   |          |          | Y            |                          |
| CNSR304865 | M      | 50  | VWF  | von Willebrand disease, type 1 | Prothrombotic state | NM_000552:exon18:c.G2303A:p.R768Q    | LP      | VUS  |          |          | Y            |                          |
| CNSR305150 | M      | 63  | VWF  | von Willebrand disease, type 1 | Prothrombotic state | NM_000552:exon43:c.G7332A:p.W2444X   | NA      | P    |          |          | Y            |                          |
| CNSR306284 | M      | 68  | VWF  | von Willebrand disease, type 1 | Prothrombotic state | NM_000552:exon18:c.G2303A:p.R768Q    | LP      | VUS  |          |          | Y            |                          |
| CNSR306560 | M      | 76  | VWF  | von Willebrand disease, type 1 | Prothrombotic state | NM_000552:exon18:c.G2303A:p.R768Q    | LP      | VUS  |          |          | Y            |                          |
| CNSR306641 | F      | 70  | VWF  | von Willebrand disease, type 1 | Prothrombotic state | NM_000552:exon44:c.C7464T:p.G2488G   | LP      | VUS  |          |          | Y            |                          |
| CNSR306919 | M      | 68  | VWF  | von Willebrand disease, type 1 | Prothrombotic state | NM_000552:exon20:c.G2561A:p.R854Q    | P/LP    | VUS  |          |          | Y            |                          |
| CNSR307271 | M      | 63  | VWF  | von Willebrand disease, type 1 | Prothrombotic state | NM_000552:exon39:c.C6835T:p.Q2279X   | NA      | P    |          |          | Y            |                          |
| CNSR308117 | F      | 79  | VWF  | von Willebrand disease, type 1 | Prothrombotic state | NM_000552:exon18:c.G2303A:p.R768Q    | LP      | VUS  |          |          | Y            |                          |

eTable 3 Continued

| Code_n     | Gender | Age | Gene   | Phenotype                                                          | Etiology of stroke   | Mutation                              | Clinvar | ACMG | Definite | Possible | Undetermined | Insufficient Information |
|------------|--------|-----|--------|--------------------------------------------------------------------|----------------------|---------------------------------------|---------|------|----------|----------|--------------|--------------------------|
| CNSR308135 | M      | 53  | VWF    | von Willebrand disease, type 1                                     | Prothrombotic state  | NM_000552:exon28:c.T3774A:p.Y1258X    | NA      | LP   |          |          | Y            |                          |
| CNSR308576 | M      | 25  | VWF    | von Willebrand disease, type 1                                     | Prothrombotic state  | NM_000552:exon18:c.G2303A:p.R768Q     | LP      | VUS  |          |          | Y            |                          |
| CNSR308978 | F      | 75  | VWF    | von Willebrand disease, type 1                                     | Prothrombotic state  | NM_000552:exon7:c.C813G:p.Y271X       | NA      | LP   |          |          | Y            |                          |
| CNSR309553 | M      | 62  | VWF    | von Willebrand disease, type 1                                     | Prothrombotic state  | NM_000552:exon28:c.G3970A:p.G1324S    | P       | VUS  |          |          | Y            |                          |
| CNSR309563 | M      | 50  | VWF    | von Willebrand disease, type 1                                     | Prothrombotic state  | NM_000552:exon28:c.4094delT:p.L1365fs | NA      | LP   |          |          | Y            |                          |
| CNSR310361 | M      | 62  | VWF    | von Willebrand disease, type 1                                     | Prothrombotic state  | NM_000552:exon30:c.G5235A:p.W1745X    | NA      | P    |          |          | Y            |                          |
| CNSR301005 | M      | 51  | COL4A1 | Brain small vessel disease with or without ocular anomalies/PADMAL | Small vessel disease | NM_001303110:exon6:c.G343A:p.G115S    | NA      | LP   | Y        |          |              |                          |
| CNSR302264 | M      | 73  | COL4A1 | Brain small vessel disease with or without ocular anomalies/PADMAL | Small vessel disease | NM_001303110:exon9:c.G502A:p.G168R    | NA      | LP   | Y        |          |              |                          |
| CNSR302968 | F      | 81  | COL4A1 | Brain small vessel disease with or without ocular anomalies/PADMAL | Small vessel disease | NM_001845:exon50:c.G4718A:p.G1573E    | NA      | LP   | Y        |          |              |                          |

eTable 3 Continued

| Code_n     | Gender | Age | Gene   | Phenotype                                                          | Etiology of stroke   | Mutation                           | Clinvar | ACMG | Definite | Possible | Undetermined | Insufficient Information |
|------------|--------|-----|--------|--------------------------------------------------------------------|----------------------|------------------------------------|---------|------|----------|----------|--------------|--------------------------|
| CNSR302973 | M      | 58  | COL4A1 | Brain small vessel disease with or without ocular anomalies/PADMAL | Small vessel disease | NM_001303110:exon15:c.G823A:p.G275 | NA      | LP   |          |          | Y            |                          |
| CNSR303061 | F      | 55  | COL4A1 | Brain small vessel disease with or without ocular anomalies/PADMAL | Small vessel disease | NM_001303110:exon9:c.G502A:p.G168R | NA      | LP   |          |          | Y            |                          |
| CNSR303631 | F      | 79  | COL4A1 | Brain small vessel disease with or without ocular anomalies/PADMAL | Small vessel disease | NM_001303110:exon21:c.G1277T:p.G42 | NA      | LP   | Y        |          |              |                          |
| CNSR303650 | F      | 88  | COL4A1 | Brain small vessel disease with or without ocular anomalies/PADMAL | Small vessel disease | NM_001845:exon27:c.G1937C;p.G646A  | NA      | LP   | Y        |          |              |                          |
| CNSR304740 | M      | 52  | COL4A1 | Brain small vessel disease with or without ocular anomalies/PADMAL | Small vessel disease | NM_001845:exon40:c.3407-1G>A       | NA      | P    |          |          | Y            |                          |
| CNSR304947 | M      | 43  | COL4A1 | Brain small vessel disease with or without ocular anomalies/PADMAL | Small vessel disease | NM_001845:exon37:c.C3187T;p.R1063X | NA      | LP   | Y        |          |              |                          |
| CNSR305943 | M      | 70  | COL4A1 | Brain small vessel disease with or without ocular anomalies/PADMAL | Small vessel disease | NM_001303110:exon6:c.G343A:p.G115S | NA      | LP   | Y        |          |              |                          |

eTable 3 Continued

| Code_n     | Gender | Age | Gene   | Phenotype                                                          | Etiology of stroke   | Mutation                             | Clinvar | ACMG | Definite | Possible | Undetermined | Insufficient Information |
|------------|--------|-----|--------|--------------------------------------------------------------------|----------------------|--------------------------------------|---------|------|----------|----------|--------------|--------------------------|
| CNSR306510 | M      | 78  | COL4A1 | Brain small vessel disease with or without ocular anomalies/PADMAL | Small vessel disease | NM_001845:exon49:c.G4471A:p.G1491S   | NA      | LP   |          |          | Y            |                          |
| CNSR307106 | M      | 58  | COL4A1 | Brain small vessel disease with or without ocular anomalies/PADMAL | Small vessel disease | NM_001303110:exon23:c.G1420A:p.G474R | NA      | LP   | Y        |          |              |                          |
| CNSR308031 | M      | 70  | COL4A1 | Brain small vessel disease with or without ocular anomalies/PADMAL | Small vessel disease | NM_001845:exon27:c.G1937C:p.G646A    | NA      | LP   |          | Y        |              |                          |
| CNSR308223 | F      | 69  | COL4A1 | Brain small vessel disease with or without ocular anomalies/PADMAL | Small vessel disease | NM_001845:exon25:c.G1640C:p.G547A    | NA      | LP   |          |          | Y            |                          |
| CNSR309282 | F      | 76  | COL4A1 | Brain small vessel disease with or without ocular anomalies/PADMAL | Small vessel disease | NM_001303110:exon15:c.G823C:p.G275R  | NA      | LP   |          |          | Y            |                          |
| CNSR310132 | F      | 81  | COL4A1 | Brain small vessel disease with or without ocular anomalies/PADMAL | Small vessel disease | NM_001845:exon39:c.G3379A:p.G1127S   | NA      | LP   | Y        |          |              |                          |
| CNSR300117 | M      | 75  | COL4A2 | Brain small vessel disease 2                                       | Small vessel disease | NM_001846:exon33:c.G2954T:p.G985V    | NA      | LP   | Y        |          |              |                          |
| CNSR300633 | M      | 64  | COL4A2 | Brain small vessel disease 2                                       | Small vessel disease | NM_001846:exon28:c.G2105C:p.G702A    | NA      | LP   |          |          | Y            |                          |

eTable 3 Continued

| Code_n     | Gender | Age | Gene   | Phenotype                    | Etiology of stroke   | Mutation                              | Clinvar | ACMG | Definite | Possible | Undetermined | Insufficient Information |
|------------|--------|-----|--------|------------------------------|----------------------|---------------------------------------|---------|------|----------|----------|--------------|--------------------------|
| CNSR300646 | M      | 65  | COL4A2 | Brain small vessel disease 2 | Small vessel disease | NM_001846:exon37:c.3420delA:p.G1140fs | NA      | LP   |          |          | Y            |                          |
| CNSR300683 | F      | 79  | COL4A2 | Brain small vessel disease 2 | Small vessel disease | NM_001846:exon19:c.G1180A:p.G394R     | NA      | LP   |          | Y        |              |                          |
| CNSR301611 | M      | 53  | COL4A2 | Brain small vessel disease 2 | Small vessel disease | NM_001846:exon36:c.G3338A:p.G1113E    | NA      | LP   |          |          | Y            |                          |
| CNSR301656 | M      | 57  | COL4A2 | Brain small vessel disease 2 | Small vessel disease | NM_001846:exon48:c.G4909A:p.G1637S    | NA      | LP   | Y        |          |              |                          |
| CNSR301698 | M      | 60  | COL4A2 | Brain small vessel disease 2 | Small vessel disease | NM_001846:exon19:c.G1180A:p.G394R     | NA      | LP   |          |          | Y            |                          |
| CNSR301913 | F      | 68  | COL4A2 | Brain small vessel disease 2 | Small vessel disease | NM_001846:exon33:c.G2954T:p.G985V     | NA      | LP   |          |          | Y            |                          |
| CNSR302077 | M      | 44  | COL4A2 | Brain small vessel disease 2 | Small vessel disease | NM_001846:exon48:c.G4906A:p.G1636S    | NA      | LP   |          |          | Y            |                          |
| CNSR302272 | F      | 61  | COL4A2 | Brain small vessel disease 2 | Small vessel disease | NM_001846:exon20:c.1306delC:p.P436fs  | NA      | LP   | Y        |          |              |                          |
| CNSR302290 | F      | 72  | COL4A2 | Brain small vessel disease 2 | Small vessel disease | NM_001846:exon46:c.G4465A:p.G1489S    | NA      | LP   | Y        |          |              |                          |
| CNSR302556 | M      | 57  | COL4A2 | Brain small vessel disease 2 | Small vessel disease | NM_001846:exon5:c.220delC:p.P74fs     | NA      | LP   |          | Y        |              |                          |

eTable 3 Continued

| Code_n     | Gender | Age | Gene   | Phenotype                    | Etiology of stroke   | Mutation                             | Clinvar | ACMG | Definite | Possible | Undetermined | Insufficient Information |
|------------|--------|-----|--------|------------------------------|----------------------|--------------------------------------|---------|------|----------|----------|--------------|--------------------------|
| CNSR302914 | F      | 70  | COL4A2 | Brain small vessel disease 2 | Small vessel disease | NM_001846:exon44:c.C4228T;p.R1410    | NA      | P    |          | Y        |              |                          |
| CNSR303301 | M      | 61  | COL4A2 | Brain small vessel disease 2 | Small vessel disease | NM_001846:exon7:c.G451A;p.G151S      | NA      | LP   |          |          | Y            |                          |
| CNSR303811 | M      | 68  | COL4A2 | Brain small vessel disease 2 | Small vessel disease | NM_001846:exon39:c.G3589A;p.G1197S   | NA      | LP   | Y        |          |              |                          |
| CNSR303908 | M      | 47  | COL4A2 | Brain small vessel disease 2 | Small vessel disease | NM_001846:exon22:c.G1525A;p.G509R    | NA      | LP   |          |          | Y            |                          |
| CNSR305035 | F      | 75  | COL4A2 | Brain small vessel disease 2 | Small vessel disease | NM_001846:exon20:c.T306delC;p.P436fs | NA      | LP   | Y        |          |              |                          |
| CNSR305298 | M      | 67  | COL4A2 | Brain small vessel disease 2 | Small vessel disease | NM_001846:exon28:c.G2105C;p.G702A    | NA      | LP   |          |          | Y            |                          |
| CNSR305789 | M      | 59  | COL4A2 | Brain small vessel disease 2 | Small vessel disease | NM_001846:exon34:c.G3088A;p.G1030S   | NA      | LP   |          |          | Y            |                          |
| CNSR306020 | M      | 52  | COL4A2 | Brain small vessel disease 2 | Small vessel disease | NM_001846:exon18:c.G1078A;p.G360S    | NA      | LP   |          |          | Y            |                          |
| CNSR306307 | F      | 76  | COL4A2 | Brain small vessel disease 2 | Small vessel disease | NM_001846:exon17:c.G995A;p.G332E     | NA      | LP   |          |          | Y            |                          |
| CNSR306619 | M      | 58  | COL4A2 | Brain small vessel disease 2 | Small vessel disease | NM_001846:exon25:c.G1778A;p.G593D    | NA      | LP   |          |          | Y            |                          |

eTable 3 Continued

| Code_n     | Gender | Age | Gene   | Phenotype                    | Etiology of stroke   | Mutation                              | Clinvar | ACMG | Definite | Possible | Undetermined | Insufficient Information |
|------------|--------|-----|--------|------------------------------|----------------------|---------------------------------------|---------|------|----------|----------|--------------|--------------------------|
| CNSR307166 | M      | 72  | COL4A2 | Brain small vessel disease 2 | Small vessel disease | NM_001846:exon12:c.G719A:p.G240D      | NA      | LP   | Y        |          |              |                          |
| CNSR307249 | M      | 62  | COL4A2 | Brain small vessel disease 2 | Small vessel disease | NM_001846:exon42:c.G3985A:p.G1329R    | NA      | LP   |          |          |              | Y                        |
| CNSR307401 | M      | 64  | COL4A2 | Brain small vessel disease 2 | Small vessel disease | NM_001846:exon44:c.4269delC:p.G1423fs | NA      | LP   | Y        |          |              |                          |
| CNSR307591 | F      | 53  | COL4A2 | Brain small vessel disease 2 | Small vessel disease | NM_001846:exon20:c.1306dupC:p.G43     | NA      | LP   |          | Y        |              |                          |
| CNSR307722 | M      | 71  | COL4A2 | Brain small vessel disease 2 | Small vessel disease | NM_001846:exon20:c.C1291T:p.R431X     | NA      | P    | Y        |          |              |                          |
| CNSR308082 | F      | 67  | COL4A2 | Brain small vessel disease 2 | Small vessel disease | NM_001846:exon34:c.G3071C:p.G1024A    | NA      | LP   |          | Y        |              |                          |
| CNSR308217 | M      | 70  | COL4A2 | Brain small vessel disease 2 | Small vessel disease | NM_001846:exon25:c.G1792A:p.G598S     | NA      | LP   | Y        |          |              |                          |
| CNSR308251 | M      | 65  | COL4A2 | Brain small vessel disease 2 | Small vessel disease | NM_001846:exon33:c.G2954T:p.G985V     | NA      | LP   | Y        |          |              |                          |
| CNSR308728 | F      | 72  | COL4A2 | Brain small vessel disease 2 | Small vessel disease | NM_001846:exon39:c.G3589A:p.G1197S    | NA      | LP   | Y        |          |              |                          |
| CNSR309273 | M      | 67  | COL4A2 | Brain small vessel disease 2 | Small vessel disease | NM_001846:exon23:c.G1597T:p.G533X     | NA      | P    | Y        |          |              |                          |

eTable 3 Continued

| Code_n     | Gender | Age | Gene   | Phenotype                    | Etiology of stroke   | Mutation                             | Clinvar | ACMG | Definite | Possible | Undetermined | Insufficient Information |
|------------|--------|-----|--------|------------------------------|----------------------|--------------------------------------|---------|------|----------|----------|--------------|--------------------------|
| CNSR309581 | M      | 68  | COL4A2 | Brain small vessel disease 2 | Small vessel disease | NM_001846:exon34:c.G3088A:p.G1030S   | NA      | LP   |          |          |              | Y                        |
| CNSR309645 | M      | 59  | COL4A2 | Brain small vessel disease 2 | Small vessel disease | NM_001846:exon22:c.G1525A:p.G509R    | NA      | LP   |          | Y        |              |                          |
| CNSR309799 | F      | 52  | COL4A2 | Brain small vessel disease 2 | Small vessel disease | NM_001846:exon40:c.G3649A:p.G1217R   | NA      | LP   |          |          | Y            |                          |
| CNSR309962 | M      | 62  | COL4A2 | Brain small vessel disease 2 | Small vessel disease | NM_001846:exon7:c.G451A:p.G151S      | NA      | LP   |          |          | Y            |                          |
| CNSR310003 | M      | 53  | COL4A2 | Brain small vessel disease 2 | Small vessel disease | NM_001846:exon39:c.G3607A:p.G1203S   | NA      | LP   | Y        |          |              |                          |
| CNSR301748 | F      | 52  | GSN    | Amyloidosis, Finnish type    | Small vessel disease | NM_000177:exon7:c.G1034A:p.W345X     | NA      | P    |          |          | Y            |                          |
| CNSR303348 | M      | 63  | GSN    | Amyloidosis, Finnish type    | Small vessel disease | NM_000177:exon12:c.1736dupT:p.V579fs | NA      | LP   |          | Y        |              |                          |
| CNSR303408 | M      | 52  | GSN    | Amyloidosis, Finnish type    | Small vessel disease | NM_000177:exon11:c.C1534T:p.Q512X    | NA      | P    |          |          | Y            |                          |
| CNSR303542 | M      | 72  | GSN    | Amyloidosis, Finnish type    | Small vessel disease | NM_000177:exon13:c.1899_1909del:p.A6 | NA      | LP   |          |          | Y            |                          |
| CNSR303781 | F      | 71  | GSN    | Amyloidosis, Finnish type    | Small vessel disease | NM_000177:exon10:c.1408delG:p.G470fs | NA      | LP   |          |          | Y            |                          |



eTable 3 Continued

| Code_n     | Gender | Age | Gene   | Phenotype                 | Etiology of stroke   | Mutation                             | Clinvar | ACMG | Definite | Possible | Undetermined | Insufficient Information |
|------------|--------|-----|--------|---------------------------|----------------------|--------------------------------------|---------|------|----------|----------|--------------|--------------------------|
| CNSR303822 | M      | 50  | GSN    | Amyloidosis, Finnish type | Small vessel disease | NM_000177:exon10:c.1408delG:p.G470fs | NA      | LP   |          |          | Y            |                          |
| CNSR304726 | F      | 55  | GSN    | Amyloidosis, Finnish type | Small vessel disease | NM_000177:exon2:c.349+1G>T           | NA      | P    |          |          | Y            |                          |
| CNSR306001 | M      | 71  | GSN    | Amyloidosis, Finnish type | Small vessel disease | NM_000177:exon10:c.G1349A:p.W450X    | NA      | P    |          |          |              | Y                        |
| CNSR309374 | M      | 54  | GSN    | Amyloidosis, Finnish type | Small vessel disease | NM_001127663:exon3:c.85dupT:p.L28fs  | NA      | LP   |          | Y        |              |                          |
| CNSR305312 | F      | 58  | HTRA1  | CARASIL                   | Small vessel disease | NM_002775:exon2:c.G517A:p.A173T      | NA      | LP   | Y        |          |              |                          |
| CNSR307080 | M      | 59  | HTRA1  | CARASIL                   | Small vessel disease | NM_002775:exon4:c.778-2A>G           | NA      | P    | Y        |          |              |                          |
| CNSR309218 | F      | 45  | HTRA1  | CARASIL                   | Small vessel disease | NM_002775:exon7:c.C1156T:p.R386X     | NA      | P    |          |          | Y            |                          |
| CNSR300221 | F      | 69  | NOTCH3 | CADASIL                   | Small vessel disease | NM_000435:exon17:c.G2687T:p.C896F    | NA      | LP   | Y        |          |              |                          |
| CNSR300468 | M      | 75  | NOTCH3 | CADASIL                   | Small vessel disease | NM_000435:exon11:c.C1630T:p.R544C    | P/LP    | P    | Y        |          |              |                          |
| CNSR300673 | M      | 74  | NOTCH3 | CADASIL                   | Small vessel disease | NM_000435:exon15:c.C2299T:p.R767C    | NA      | LP   |          | Y        |              |                          |
| CNSR300768 | M      | 43  | NOTCH3 | CADASIL                   | Small vessel disease | NM_000435:exon11:c.C1630T:p.R544C    | P/LP    | P    | Y        |          |              |                          |

eTable 3 Continued

| Code_n     | Gender | Age | Gene   | Phenotype | Etiology of stroke   | Mutation                           | Clinvar | ACMG | Definite | Possible | Undetermined | Insufficient Information |
|------------|--------|-----|--------|-----------|----------------------|------------------------------------|---------|------|----------|----------|--------------|--------------------------|
| CNSR300946 | M      | 42  | NOTCH3 | CADASIL   | Small vessel disease | NM_000435:exon21:c.C3427T;p.R1143C | NA      | LP   | Y        |          |              |                          |
| CNSR301247 | M      | 55  | NOTCH3 | CADASIL   | Small vessel disease | NM_000435:exon13:c.A2129G;p.Y710C  | NA      | LP   | Y        |          |              |                          |
| CNSR301511 | M      | 37  | NOTCH3 | CADASIL   | Small vessel disease | NM_000435:exon20:c.G3313T;p.G1105C | NA      | LP   | Y        |          |              |                          |
| CNSR301757 | M      | 46  | NOTCH3 | CADASIL   | Small vessel disease | NM_000435:exon18:c.C2898A;p.C966X  | NA      | P    | Y        |          |              |                          |
| CNSR301888 | F      | 61  | NOTCH3 | CADASIL   | Small vessel disease | NM_000435:exon16:c.G2459T;p.C820F  | NA      | LP   | Y        |          |              |                          |
| CNSR301929 | M      | 65  | NOTCH3 | CADASIL   | Small vessel disease | NM_000435:exon11:c.C1759T;p.R587C  | NA      | LP   | Y        |          |              |                          |
| CNSR301933 | M      | 61  | NOTCH3 | CADASIL   | Small vessel disease | NM_000435:exon13:c.C2038T;p.R680C  | NA      | LP   | Y        |          |              |                          |
| CNSR302163 | M      | 46  | NOTCH3 | CADASIL   | Small vessel disease | NM_000435:exon15:c.C2299T;p.R767C  | NA      | LP   | Y        |          |              |                          |
| CNSR302623 | M      | 46  | NOTCH3 | CADASIL   | Small vessel disease | NM_000435:exon4:c.T547A;p.C183S    | NA      | LP   | Y        |          |              |                          |
| CNSR302884 | M      | 55  | NOTCH3 | CADASIL   | Small vessel disease | NM_000435:exon11:c.C1630T;p.R544C  | P/LP    | P    | Y        |          |              |                          |

eTable 3 Continued

| Code_n     | Gender | Age | Gene   | Phenotype | Etiology of stroke   | Mutation                           | Clinvar | ACMG | Definite | Possible | Undetermined | Insufficient Information |
|------------|--------|-----|--------|-----------|----------------------|------------------------------------|---------|------|----------|----------|--------------|--------------------------|
| CNSR302919 | M      | 53  | NOTCH3 | CADASIL   | Small vessel disease | NM_000435:exon12:c.C1918T;p.R640C  | NA      | LP   |          |          | Y            |                          |
| CNSR303044 | M      | 58  | NOTCH3 | CADASIL   | Small vessel disease | NM_000435:exon17:c.G2689T;p.G897C  | NA      | LP   | Y        |          |              |                          |
| CNSR303149 | M      | 58  | NOTCH3 | CADASIL   | Small vessel disease | NM_000435:exon11:c.C1759T;p.R587C  | NA      | LP   | Y        |          |              |                          |
| CNSR303251 | F      | 64  | NOTCH3 | CADASIL   | Small vessel disease | NM_000435:exon11:c.C1630T;p.R544C  | P/LP    | P    | Y        |          |              |                          |
| CNSR303417 | F      | 81  | NOTCH3 | CADASIL   | Small vessel disease | NM_000435:exon22:c.C3601T;p.R1201C | NA      | LP   | Y        |          |              |                          |
| CNSR303714 | F      | 67  | NOTCH3 | CADASIL   | Small vessel disease | NM_000435:exon11:c.C1759T;p.R587C  | NA      | LP   | Y        |          |              |                          |
| CNSR303980 | F      | 56  | NOTCH3 | CADASIL   | Small vessel disease | NM_000435:exon12:c.C1918T;p.R640C  | NA      | LP   | Y        |          |              |                          |
| CNSR304138 | F      | 46  | NOTCH3 | CADASIL   | Small vessel disease | NM_000435:exon5:c.G798C;p.W266C    | NA      | LP   | Y        |          |              |                          |
| CNSR304414 | F      | 66  | NOTCH3 | disease   | Small vessel disease | NM_000435:exon11:c.C1630T;p.R544C  | P/LP    | P    | Y        |          |              |                          |
| CNSR304488 | M      | 54  | NOTCH3 | CADASIL   | Small vessel disease | NM_000435:exon3:c.G260T;p.C87F     | NA      | LP   | Y        |          |              |                          |
| CNSR304558 | F      | 61  | NOTCH3 | CADASIL   | Small vessel disease | NM_000435:exon10:c.G1547T;p.C516F  | NA      | LP   | Y        |          |              |                          |

eTable 3 Continued

| Code_n     | Gender | Age | Gene   | Phenotype | Etiology of stroke   | Mutation                           | Clinvar | ACMG | Definite | Possible | Undetermined | Insufficient Information |
|------------|--------|-----|--------|-----------|----------------------|------------------------------------|---------|------|----------|----------|--------------|--------------------------|
| CNSR304990 | M      | 45  | NOTCH3 | CADASIL   | Small vessel disease | NM_000435:exon14:c.C2149T;p.R717C  | NA      | LP   | Y        |          |              |                          |
| CNSR305140 | M      | 59  | NOTCH3 | CADASIL   | Small vessel disease | NM_000435:exon22:c.C3568T;p.R1190C | NA      | LP   | Y        |          |              |                          |
| CNSR305147 | M      | 50  | NOTCH3 | CADASIL   | Small vessel disease | NM_000435:exon14:c.C2182T;p.R728C  | LP      | VUS  | Y        |          |              |                          |
| CNSR305228 | M      | 56  | NOTCH3 | CADASIL   | Small vessel disease | NM_000435:exon20:c.C3298T;p.R1100C | NA      | LP   | Y        |          |              |                          |
| CNSR305245 | F      | 63  | NOTCH3 | CADASIL   | Small vessel disease | NM_000435:exon11:c.C1630T;p.R544C  | P/LP    | P    |          |          | Y            |                          |
| CNSR305301 | M      | 57  | NOTCH3 | CADASIL   | Small vessel disease | NM_000435:exon11:c.C1630T;p.R544C  | P/LP    | P    | Y        |          |              |                          |
| CNSR305508 | M      | 57  | NOTCH3 | CADASIL   | Small vessel disease | NM_000435:exon11:c.C1630T;p.R544C  | P/LP    | P    | Y        |          |              |                          |
| CNSR305632 | M      | 79  | NOTCH3 | CADASIL   | Small vessel disease | NM_000435:exon21:c.C3427T;p.R1143C | NA      | LP   | Y        |          |              |                          |
| CNSR306139 | F      | 61  | NOTCH3 | CADASIL   | Small vessel disease | NM_000435:exon16:c.T2498G;p.F833C  | NA      | LP   | Y        |          |              |                          |
| CNSR306600 | M      | 52  | NOTCH3 | CADASIL   | Small vessel disease | NM_000435:exon11:c.C1759T;p.R587C  | NA      | LP   | Y        |          |              |                          |

eTable 3 Continued

| Code_n     | Gender | Age | Gene   | Phenotype | Etiology of stroke   | Mutation                          | Clinvar | ACMG | Definite | Possible | Undetermined | Insufficient Information |
|------------|--------|-----|--------|-----------|----------------------|-----------------------------------|---------|------|----------|----------|--------------|--------------------------|
| CNSR306663 | F      | 68  | NOTCH3 | CADASIL   | Small vessel disease | NM_000435:exon15:c.C2353T;p.R785C | NA      | LP   | Y        |          |              |                          |
| CNSR306806 | F      | 56  | NOTCH3 | CADASIL   | Small vessel disease | NM_000435:exon6:c.889_894delinsTG | NA      | P    |          |          | Y            |                          |
| CNSR306879 | M      | 61  | NOTCH3 | CADASIL   | Small vessel disease | NM_000435:exon11:c.C1630T;p.R544C | P/LP    | P    | Y        |          |              |                          |
| CNSR306929 | M      | 39  | NOTCH3 | CADASIL   | Small vessel disease | NM_000435:exon11:c.C1630T;p.R544C | P/LP    | P    | Y        |          |              |                          |
| CNSR306956 | M      | 82  | NOTCH3 | CADASIL   | Small vessel disease | NM_000435:exon15:c.C2353T;p.R785C | NA      | LP   | Y        |          |              |                          |
| CNSR307019 | F      | 63  | NOTCH3 | CADASIL   | Small vessel disease | NM_000435:exon12:c.T1931A;p.V644D | NA      | LP   | Y        |          |              |                          |
| CNSR307044 | F      | 52  | NOTCH3 | CADASIL   | Small vessel disease | NM_000435:exon4:c.G671A;p.C224Y   | P       | VUS  | Y        |          |              |                          |
| CNSR307182 | M      | 44  | NOTCH3 | CADASIL   | Small vessel disease | NM_000435:exon11:c.C1759T;p.R587C | NA      | LP   | Y        |          |              |                          |
| CNSR307435 | M      | 74  | NOTCH3 | CADASIL   | Small vessel disease | NM_000435:exon18:c.2984delC;p.P99 | NA      | LP   |          |          |              | Y                        |
| CNSR307912 | M      | 65  | NOTCH3 | CADASIL   | Small vessel disease | NM_000435:exon11:c.C1630T;p.R544C | P/LP    | P    | Y        |          |              |                          |
| CNSR308185 | M      | 61  | NOTCH3 | CADASIL   | Small vessel disease | NM_000435:exon4:c.C619T;p.R207C   | P/LP    | VUS  |          | Y        |              |                          |

eTable 3 Continued

| Code_n     | Gender | Age | Gene   | Phenotype                                 | Etiology of stroke   | Mutation                           | Clinvar | ACMG | Definite | Possible | Undetermined | Insufficient Information |
|------------|--------|-----|--------|-------------------------------------------|----------------------|------------------------------------|---------|------|----------|----------|--------------|--------------------------|
| CNSR308416 | F      | 75  | NOTCH3 | CADASIL                                   | Small vessel disease | NM_000435:exon11:c.C1759T;p.R587C  | NA      | LP   | Y        |          |              |                          |
| CNSR308638 | F      | 52  | NOTCH3 | CADASIL                                   | Small vessel disease | NM_000435:exon9:c.1488delC;p.P496  | NA      | LP   |          |          | Y            |                          |
| CNSR308656 | M      | 65  | NOTCH3 | CADASIL                                   | Small vessel disease | NM_000435:exon11:c.C1630T;p.R544C  | P/LP    | P    |          | Y        |              |                          |
| CNSR308967 | M      | 63  | NOTCH3 | CADASIL                                   | Small vessel disease | NM_000435:exon11:c.C1819T;p.R607C  | P/LP    | VUS  | Y        |          |              |                          |
| CNSR309724 | M      | 49  | NOTCH3 | CADASIL                                   | Small vessel disease | NM_000435:exon11:c.C1630T;p.R544C  | P/LP    | P    | Y        |          |              |                          |
| CNSR310191 | M      | 61  | NOTCH3 | CADASIL                                   | Small vessel disease | NM_000435:exon11:c.C1630T;p.R544C  | P/LP    | P    | Y        |          |              |                          |
| CNSR310413 | M      | 75  | NOTCH3 | CADASIL                                   | Small vessel disease | NM_000435:exon21:c.C3427T;p.R1143C | NA      | LP   |          |          | Y            |                          |
| CNSR300708 | F      | 67  | PRNP   | Cerebral amyloid angiopathy, PRNP-related | Small vessel disease | NM_000311:exon2:c.G538A;p.V180I    | P/LP    | VUS  |          |          | Y            |                          |
| CNSR301128 | M      | 76  | PRNP   | Cerebral amyloid angiopathy, PRNP-related | Small vessel disease | NM_000311:exon2:c.G538A;p.V180I    | P/LP    | VUS  |          |          | Y            |                          |
| CNSR304209 | M      | 71  | PRNP   | Cerebral amyloid angiopathy, PRNP-related | Small vessel disease | NM_000311:exon2:c.G628A;p.V210I    | P       | VUS  |          |          | Y            |                          |
| CNSR304380 | M      | 69  | PSEN1  | Alzheimer's disease                       | Small vessel disease | NM_000021:exon7:c.C658T;p.R220X    | NA      | P    |          |          | Y            |                          |

eTable 3 Continued

| Code_n     | Gender | Age | Gene  | Phenotype                                                                                   | Etiology of stroke   | Mutation                                    | Clinvar | ACMG | Definite | Possible | Undetermined | Insufficient Information |
|------------|--------|-----|-------|---------------------------------------------------------------------------------------------|----------------------|---------------------------------------------|---------|------|----------|----------|--------------|--------------------------|
| CNSR307124 | F      | 71  | TREX1 | Vasculopathy, retinal, with cerebral leukoencephalopathy and systemic manifestations/RVCL-S | Small vessel disease | NM_016381:exon1:c.1024_1041del:p.342_347del | P       | VUS  |          |          | Y            |                          |
| CNSR308620 | M      | 70  | TREX1 | Vasculopathy, retinal, with cerebral leukoencephalopathy and systemic manifestations/RVCL-S | Small vessel disease | NM_016381:exon1:c.G832A:p.A278T, TR         | LP      | VUS  |          |          | Y            |                          |
| CNSR300109 | F      | 67  | TTR   | Amyloidosis, hereditary, transthyretin-related                                              | Small vessel disease | NM_000371:exon3:c.A326G:p.E109G             | NA      | LP   |          |          | Y            |                          |
| CNSR300873 | M      | 69  | TTR   | Amyloidosis, hereditary, transthyretin-related                                              | Small vessel disease | NM_000371:exon4:c.C347G:p.T116R             | NA      | LP   |          | Y        |              |                          |
| CNSR300907 | M      | 45  | TTR   | Amyloidosis, hereditary, transthyretin-related                                              | Small vessel disease | NM_000371:exon2:c.C170A:p.A57D              | NA      | LP   |          |          | Y            |                          |
| CNSR301040 | M      | 74  | TTR   | Amyloidosis, hereditary, transthyretin-related                                              | Small vessel disease | NM_000371:exon2:c.T119C:p.V40A              | NA      | LP   |          |          | Y            |                          |
| CNSR301165 | F      | 54  | TTR   | Amyloidosis, hereditary, transthyretin-related                                              | Small vessel disease | NM_000371:exon2:c.C170A:p.A57D              | NA      | LP   |          |          | Y            |                          |
| CNSR302353 | M      | 78  | TTR   | Amyloidosis, hereditary, transthyretin-related                                              | Small vessel disease | NM_000371:exon2:c.C170A:p.A57D              | NA      | LP   |          | Y        |              |                          |

eTable 3 Continued

| Code_n     | Gender | Age | Gene | Phenotype                                      | Etiology of stroke   | Mutation                        | Clinvar | ACMG | Definite | Possible | Undetermined | Insufficient Information |
|------------|--------|-----|------|------------------------------------------------|----------------------|---------------------------------|---------|------|----------|----------|--------------|--------------------------|
| CNSR303371 | M      | 37  | TTR  | Amyloidosis, hereditary, transthyretin-related | Small vessel disease | NM_000371:exon2:c.C170A:p.A57D  | NA      | LP   |          |          | Y            |                          |
| CNSR304525 | M      | 46  | TTR  | Amyloidosis, hereditary, transthyretin-related | Small vessel disease | NM_000371:exon4:c.G424A:p.V142I | P/LP    | VUS  |          |          | Y            |                          |
| CNSR304550 | F      | 57  | TTR  | Amyloidosis, hereditary, transthyretin-related | Small vessel disease | NM_000371:exon3:c.A287G:p.K96R  | NA      | LP   |          |          | Y            |                          |
| CNSR305919 | M      | 61  | TTR  | Amyloidosis, hereditary, transthyretin-related | Small vessel disease | NM_000371:exon3:c.G307A:p.G103S | NA      | LP   |          |          |              | Y                        |
| CNSR306558 | F      | 45  | TTR  | Amyloidosis, hereditary, transthyretin-related | Small vessel disease | NM_000371:exon3:c.G241A:p.E81K  | P       | VUS  |          |          | Y            |                          |
| CNSR306867 | M      | 70  | TTR  | Amyloidosis, hereditary, transthyretin-related | Small vessel disease | NM_000371:exon2:c.C170A:p.A57D  | NA      | LP   |          |          | Y            |                          |
| CNSR307119 | M      | 64  | TTR  | Amyloidosis, hereditary, transthyretin-related | Small vessel disease | NM_000371:exon4:c.C347G:p.T116R | NA      | LP   |          |          | Y            |                          |
| CNSR307312 | F      | 64  | TTR  | Amyloidosis, hereditary, transthyretin-related | Small vessel disease | NM_000371:exon2:c.T119C:p.V40A  | NA      | LP   |          |          | Y            |                          |
| CNSR307403 | F      | 60  | TTR  | Amyloidosis, hereditary, transthyretin-related | Small vessel disease | NM_000371:exon3:c.A287G:p.K96R  | NA      | LP   |          |          | Y            |                          |
| CNSR307497 | M      | 60  | TTR  | Amyloidosis, hereditary, transthyretin-related | Small vessel disease | NM_000371:exon2:c.C170A:p.A57D  | NA      | LP   |          |          | Y            |                          |



eTable 3 Continued

| Code_n     | Gender | Age | Gene   | Phenotype                                      | Etiology of stroke   | Mutation                        | Clinvar | ACMG | Definite | Possible | Undetermined | Insufficient Information |
|------------|--------|-----|--------|------------------------------------------------|----------------------|---------------------------------|---------|------|----------|----------|--------------|--------------------------|
| CNSR307816 | M      | 71  | TTR    | Amyloidosis, hereditary, transthyretin-related | Small vessel disease | NM_000371:exon2:c.C170A:p.A57D  | NA      | LP   |          |          | Y            |                          |
| CNSR307956 | M      | 58  | TTR    | Amyloidosis, hereditary, transthyretin-related | Small vessel disease | NM_000371:exon2:c.C170A:p.A57D  | NA      | LP   |          |          | Y            |                          |
| CNSR308636 | F      | 64  | TTR    | Amyloidosis, hereditary, transthyretin-related | Small vessel disease | NM_000371:exon4:c.C419T:p.A140V | NA      | LP   |          |          | Y            |                          |
| CNSR309004 | M      | 62  | TTR    | Amyloidosis, hereditary, transthyretin-related | Small vessel disease | NM_000371:exon4:c.G361A:p.G121S | NA      | LP   |          |          | Y            |                          |
| CNSR310000 | M      | 45  | TTR    | Amyloidosis, hereditary, transthyretin-related | Small vessel disease | NM_000371:exon4:c.G349T:p.A117S | P/LP    | VUS  |          |          | Y            |                          |
| CNSR310227 | F      | 62  | TTR    | Amyloidosis, hereditary, transthyretin-related | Small vessel disease | NM_000371:exon4:c.G361A:p.G121S | NA      | LP   |          |          | Y            |                          |
| CNSR310334 | M      | 47  | TTR    | Amyloidosis, hereditary, transthyretin-related | Small vessel disease | NM_000371:exon2:c.G148A:p.V50M  | P       | LP   |          |          | Y            |                          |
| CNSR310356 | M      | 69  | TTR    | Amyloidosis, hereditary, transthyretin-related | Small vessel disease | NM_000371:exon4:c.C413T:p.T138I | NA      | LP   |          |          | Y            |                          |
| CNSR302278 | F      | 75  | ACVRL1 | Telangiectasia, hereditary hemorrhagic, type 2 | Other disease        | NM_000020:exon7:c.C936A:p.H312Q | NA      | LP   |          |          |              | Y                        |
| CNSR302466 | M      | 55  | ACVRL1 | Telangiectasia, hereditary hemorrhagic, type 2 | Other disease        | NM_000020:exon6:c.G682A:p.V228I | LP      | VUS  |          |          | Y            |                          |

eTable 3 Continued

| Code_n     | Gender | Age | Gene   | Phenotype                                                                      | Etiology of stroke | Mutation                                     | Clinvar | ACMG | Definite | Possible | Undetermined | Insufficient Information |
|------------|--------|-----|--------|--------------------------------------------------------------------------------|--------------------|----------------------------------------------|---------|------|----------|----------|--------------|--------------------------|
| CNSR304271 | M      | 68  | ACVRL1 | Telangiectasia, hereditary hemorrhagic, type 2                                 | Other disease      | NM_001077401:exon6:c.817_818delinsTG:p.L273W | NA      | LP   |          |          | Y            |                          |
| CNSR300263 | M      | 79  | APOA1  | Amyloidosis, 3 or more types                                                   | Other disease      | NM_000039:exon3:c.127dupG:p.V43fs            | NA      | LP   |          |          | Y            |                          |
| CNSR304280 | F      | 47  | APOA1  | Amyloidosis, 3 or more types                                                   | Other disease      | NM_000039:exon3:c.116_117insTGGC:p.A39fs     | NA      | LP   |          |          | Y            |                          |
| CNSR302473 | M      | 61  | BMPR2  | Pulmonary hypertension, primary                                                | Other disease      | NM_001204:exon2:c.77-1G>C                    | NA      | P    |          |          | Y            |                          |
| CNSR303094 | M      | 62  | BMPR2  | Pulmonary hypertension, primary                                                | Other disease      | NM_001204:exon12:c.G1687A:p.V563M            | P       | VUS  |          |          | Y            |                          |
| CNSR306598 | M      | 76  | BMPR2  | Pulmonary hypertension, primary                                                | Other disease      | NM_001204:exon12:c.G1687A:p.V563M            | P       | VUS  |          |          | Y            |                          |
| CNSR310185 | M      | 44  | BMPR2  | Pulmonary hypertension, primary                                                | Other disease      | NM_001204:exon12:c.G1687A:p.V563M            | P       | VUS  |          |          | Y            |                          |
| CNSR301648 | M      | 64  | CBL    | Noonan syndrome-like disorder with or without juvenile myelomonocytic leukemia | Other disease      | NM_005188:exon13:c.2153+1G>T                 | NA      | P    |          |          |              | Y                        |
| CNSR308533 | F      | 65  | CBL    | Noonan syndrome-like disorder with or without juvenile myelomonocytic leukemia | Other disease      | NM_005188:exon8:c.T1111C:p.Y371H             | P       | VUS  |          |          | Y            |                          |

eTable 3 Continued

| Code_n     | Gender | Age | Gene   | Phenotype                                      | Etiology of stroke | Mutation                             | Clinvar | ACMG | Definite | Possible | Undetermined | Insufficient Information |
|------------|--------|-----|--------|------------------------------------------------|--------------------|--------------------------------------|---------|------|----------|----------|--------------|--------------------------|
| CNSR309022 | F      | 51  | DYRK1B | Abdominal obesity-metabolic syndrome 3         | Other disease      | NM_004714:exon10:c.C1462T;p.R488X    | NA      | P    |          |          | Y            |                          |
| CNSR309338 | F      | 69  | DYRK1B | Abdominal obesity-metabolic syndrome 3         | Other disease      | NM_004714:exon3:c.149_150del;p.V50fs | NA      | LP   |          |          | Y            |                          |
| CNSR303561 | M      | 60  | ENG    | Telangiectasia, hereditary hemorrhagic, type 1 | Other disease      | NM_000118:exon2:c.G219A;p.T73T       | P       | VUS  |          |          | Y            |                          |
| CNSR304704 | M      | 45  | FLCN   | Birt-Hogg-Dube syndrome                        | Other disease      | NM_144997:exon12:c.1381dupA;p.S461fs | NA      | LP   |          |          | Y            |                          |
| CNSR307128 | M      | 72  | FLCN   | Birt-Hogg-Dube syndrome                        | Other disease      | NM_144997:exon4:c.7delG;p.A3fs       | NA      | LP   |          |          | Y            |                          |
| CNSR309913 | F      | 58  | FLCN   | Birt-Hogg-Dube syndrome                        | Other disease      | NM_144997:exon11:c.1285dupC;p.H429fs | P       | LP   |          |          | Y            |                          |
| CNSR309961 | M      | 47  | FLCN   | Birt-Hogg-Dube syndrome                        | Other disease      | NM_144997:exon11:c.1285dupC;p.H429fs | P       | LP   |          |          | Y            |                          |
| CNSR310041 | M      | 61  | FLCN   | Birt-Hogg-Dube syndrome                        | Other disease      | NM_144997:exon9:c.C1015T;p.Q339X     | NA      | P    |          |          | Y            |                          |
| CNSR304882 | F      | 44  | GLA    | Fabry Disease                                  | Other disease      | NM_000169:exon3:c.514delT;p.C172fs   | NA      | LP   |          | Y        |              |                          |
| CNSR306744 | M      | 76  | GLA    | Fabry Disease                                  | Other disease      | c.639+919G>A                         | P       | VUS  |          | Y        |              |                          |
| CNSR301291 | F      | 84  | KIF1B  | Pheochromocytoma                               | Other disease      | NM_015074:exon6:c.C463T;p.R155X      | NA      | P    |          |          | Y            |                          |
| CNSR308367 | M      | 84  | KIF1B  | Pheochromocytoma                               | Other disease      | NM_183416:exon21:c.1996delG;p.G66fs  | NA      | LP   |          |          | Y            |                          |

eTable 3 Continued

| Code_n     | Gender | Age | Gene  | Phenotype                                            | Etiology of stroke | Mutation                             | Clinvar | ACMG | Definite | Possible | Undetermined | Insufficient Information |
|------------|--------|-----|-------|------------------------------------------------------|--------------------|--------------------------------------|---------|------|----------|----------|--------------|--------------------------|
| CNSR300249 | M      | 56  | KRIT1 | Cerebral cavernous malformations-1                   | Other disease      | NM_194454:exon13:c.G1391A:p.W464X    | P       | P    | Y        |          |              |                          |
| CNSR302326 | F      | 51  | KRIT1 | Cerebral cavernous malformations-1                   | Other disease      | NM_194456:exon8:c.457dupA:p.T153fs   | NA      | LP   |          |          | Y            |                          |
| CNSR304825 | F      | 60  | KRIT1 | Cerebral cavernous malformations-1                   | Other disease      | NM_194456:exon6:c.262+1G>A           | NA      | P    |          |          | Y            |                          |
| CNSR305230 | M      | 63  | KRIT1 | Cerebral cavernous malformations-1                   | Other disease      | NM_194456:exon5:c.T33G:p.Y11X        | NA      | LP   |          |          | Y            |                          |
| CNSR309657 | M      | 51  | KRIT1 | Cerebral cavernous malformations-1                   | Other disease      | NM_194456:exon9:c.T585A:p.Y195X      | NA      | LP   |          |          | Y            |                          |
| CNSR305024 | M      | 52  | NF1   | Neurofibromatosis 1                                  | Other disease      | NM_000267:exon41:c.C6349T:p.Q2117X   | NA      | P    |          | Y        |              |                          |
| CNSR305340 | M      | 53  | NF1   | Neurofibromatosis 1                                  | Other disease      | NM_000267:exon18:c.2027dupC:p.T676fs | P       | LP   |          | Y        |              |                          |
| CNSR307410 | M      | 73  | NF1   | Neurofibromatosis 1                                  | Other disease      | NM_000267:exon4:c.G479A:p.R160K      | LP      | VUS  |          | Y        |              |                          |
| CNSR304809 | M      | 53  | PDE4D | Acrodysostosis 2, with or without hormone resistance | Other disease      | NM_001165899:exon3:c.G94T:p.G32X     | NA      | P    |          |          | Y            |                          |
| CNSR304838 | F      | 62  | PDE4D | Acrodysostosis 2, with or without hormone resistance | Other disease      | NM_001197223:exon1:c.18_21del:p.Y6fs | NA      | LP   |          |          | Y            |                          |
| CNSR300154 | M      | 60  | PKD1  | ADPKD                                                | Other disease      | NM_001009944.3(PKD1):c.7065+9C>T     | P       | VUS  |          |          | Y            |                          |

eTable 3 Continued

| Code_n     | Gender | Age | Gene | Phenotype | Etiology of stroke | Mutation                                | Clinvar | ACMG | Definite | Possible | Undetermined | Insufficient Information |
|------------|--------|-----|------|-----------|--------------------|-----------------------------------------|---------|------|----------|----------|--------------|--------------------------|
| CNSR300265 | M      | 53  | PKD1 | ADPKD     | Other disease      | NM_001009944:exon10:c.1987delC;p.Q663fs | NA      | LP   |          | Y        |              |                          |
| CNSR301236 | M      | 69  | PKD1 | ADPKD     | Other disease      | NM_001009944:exon44:c.G12036A;p.W4012X  | P       | P    |          | Y        |              |                          |
| CNSR301587 | F      | 64  | PKD1 | ADPKD     | Other disease      | NM_001009944:exon29:c.C9829T;p.R3277C   | P/LP    | VUS  |          |          | Y            |                          |
| CNSR304664 | F      | 49  | PKD1 | ADPKD     | Other disease      | NM_001009944:exon11:c.T2534G;p.L845W    | NA      | LP   |          |          | Y            |                          |
| CNSR306045 | F      | 56  | PKD1 | ADPKD     | Other disease      | NM_001009944:exon19:c.G7494A;p.W2498X   | NA      | P    |          |          | Y            |                          |
| CNSR306128 | M      | 65  | PKD1 | ADPKD     | Other disease      | NM_001009944:exon34:c.10499+1G>A        | NA      | P    |          |          | Y            |                          |
| CNSR309549 | M      | 47  | PKD1 | ADPKD     | Other disease      | NM_001009944:exon11:c.T2534C;p.L845S    | P/LP    | VUS  |          |          | Y            |                          |
| CNSR309966 | F      | 50  | PKD1 | ADPKD     | Other disease      | NM_001009944:exon45:c.G12391T;p.E4131X  | P       | P    |          |          | Y            |                          |
| CNSR301946 | M      | 67  | PKD2 | ADPKD     | Other disease      | NM_000297:exon3:c.779delC;p.T260fs      | NA      | LP   |          |          | Y            |                          |
| CNSR301999 | F      | 54  | PKD2 | ADPKD     | Other disease      | NM_000297:exon4:c.C958T;p.R320X         | P       | P    | Y        |          |              |                          |
| CNSR303365 | M      | 53  | PKD2 | ADPKD     | Other disease      | NM_000297:exon4:c.1094+1G>C             | NA      | P    | Y        |          |              |                          |

eTable 3 Continued

| Code_n     | Gender | Age | Gene  | Phenotype                                       | Etiology of stroke | Mutation                          | Clinvar | ACMG | Definite | Possible | Undetermined | Insufficient Information |
|------------|--------|-----|-------|-------------------------------------------------|--------------------|-----------------------------------|---------|------|----------|----------|--------------|--------------------------|
| CNSR304191 | F      | 57  | PKD2  | ADPKD                                           | Other disease      | NM_000297:exon14:c.C2533T;p.R845X | P       | P    | Y        |          |              |                          |
| CNSR308318 | M      | 59  | PKD2  | ADPKD                                           | Other disease      | NM_000297:exon12:c.G2305T;p.E769X | LP      | P    | Y        |          |              |                          |
| CNSR308733 | F      | 63  | PKD2  | ADPKD                                           | Other disease      | NM_000297:exon6:c.T1506G;p.Y502X  | NA      | P    | Y        |          |              |                          |
| CNSR301009 | F      | 76  | RET   | Medullary thyroid carcinoma or Pheochromocytoma | Other disease      | NM_020975:exon14:c.G2410A;p.V804M | P/LP    | VUS  |          |          | Y            |                          |
| CNSR301675 | M      | 62  | RET   | Medullary thyroid carcinoma or Pheochromocytoma | Other disease      | NM_020975:exon14:c.G2410A;p.V804M | P/LP    | VUS  |          |          | Y            |                          |
| CNSR303165 | F      | 61  | RET   | Medullary thyroid carcinoma or Pheochromocytoma | Other disease      | NM_020975:exon14:c.G2410A;p.V804M | P/LP    | VUS  |          |          | Y            |                          |
| CNSR305395 | M      | 60  | RET   | Medullary thyroid carcinoma or Pheochromocytoma | Other disease      | NM_020975:exon13:c.G2370T;p.L790F | P       | VUS  |          |          | Y            |                          |
| CNSR309526 | F      | 64  | RET   | Medullary thyroid carcinoma or Pheochromocytoma | Other disease      | NM_020975:exon13:c.G2370T;p.L790F | P       | VUS  |          |          | Y            |                          |
| CNSR310343 | M      | 68  | RET   | Medullary thyroid carcinoma or Pheochromocytoma | Other disease      | NM_020975:exon14:c.G2410A;p.V804M | P/LP    | VUS  |          |          | Y            |                          |
| CNSR303341 | M      | 44  | TGIF1 | Holoprosencephaly 4                             | Other disease      | NM_173208:exon3:c.C83T;p.S28F     | NA      | LP   |          |          | Y            |                          |
| CNSR308090 | F      | 71  | TGIF1 | Holoprosencephaly 4                             | Other disease      | NM_173208:exon4:c.A451G;p.T151A   | P       | VUS  |          |          | Y            |                          |

**eTable 3 Continued**

| Code_n     | Gender | Age | Gene  | Phenotype           | Etiology of stroke | Mutation                        | Clinvar | ACMG | Definite | Possible | Undetermined | Insufficient Information |
|------------|--------|-----|-------|---------------------|--------------------|---------------------------------|---------|------|----------|----------|--------------|--------------------------|
| CNSR308126 | M      | 66  | TGIF1 | Holoprosencephaly 4 | Other disease      | NM_173208:exon4:c.A451G;p.T151A | P       | VUS  |          |          | Y            |                          |
| CNSR304572 | M      | 62  | VHL   | Pheochromocytoma    | Other disease      | NM_000551:exon3:c.A479G;p.E160G | NA      | LP   |          |          |              | Y                        |

**eTable 4 Diagnoses of 29 individuals harbored more than 2 P/LP variants in different genes**

| Code_n     | Gender | Age | Gene     | Phenotype                                        | Etiology of stroke   | Mutation                                                          | Clinvar | ACMG | Definite | Possible | Undetermined | Insufficient Information |
|------------|--------|-----|----------|--------------------------------------------------|----------------------|-------------------------------------------------------------------|---------|------|----------|----------|--------------|--------------------------|
| CNSR300094 | M      | 70  | CETP     | Hyperalphalipoproteinemia                        | Large artery disease | NM_000078:exon2:c.C160T:p.R54X                                    | NA      | LP   |          |          | Y            |                          |
| CNSR300094 | M      | 70  | VWF      | von Willebrand disease, type 1                   | Prothrombotic state  | NM_000552:exon28:c.C4909T:p.Q1637X                                | NA      | P    |          | Y        |              |                          |
| CNSR300101 | M      | 68  | LDLR     | Hypercholesterolemia, familial, 1                | Large artery disease | NM_000527:exon3:c.497delinsGGATCCCCCA GCTGCATCCCCCAG:p.A166GfsX48 | LP      | VUS  |          | Y        |              |                          |
| CNSR300101 | M      | 68  | RNF213   | Moyamoya disease                                 | Large artery disease | NM_001256071:exon60:c.G14429A:p.R4810K                            | P       | VUS  |          |          | Y            |                          |
| CNSR300197 | F      | 67  | JAK2     | Thrombocythemia 3                                | Prothrombotic state  | NM_004972:exon14:c.G1849T:p.V617F                                 | P       | VUS  | Y        |          |              |                          |
| CNSR300197 | F      | 67  | SERPINC1 | Thrombophilia due to antithrombin III deficiency | Prothrombotic state  | NM_000488:exon2:c.C235T:p.R79C                                    | LP      | VUS  |          |          | Y            |                          |
| CNSR300499 | F      | 82  | ELN      | SVAS                                             | Large artery disease | c.639+919G>A                                                      | NA      | P    |          |          | Y            |                          |
| CNSR300499 | F      | 82  | GLA      | Fabry Disease                                    | Other disease        | NM_000501:exon14:c.686-2A>G                                       | P       | VUS  |          | Y        |              |                          |
| CNSR300830 | M      | 64  | KCNQ1    | Hereditary cardiac dysrhythm                     | Embolic stroke       | NM_000218:exon3:c.T560C:p.L187P                                   | P/LP    | VUS  |          | Y        |              |                          |
| CNSR300830 | M      | 64  | RNF213   | Moyamoya disease                                 | Large artery disease | NM_001256071:exon60:c.G14429A:p.R4810K                            | P       | VUS  |          |          | Y            |                          |
| CNSR301010 | M      | 55  | LDLR     | Hypercholesterolemia, familial, 1                | Large artery disease | NM_000527:exon5:c.G796A:p.D266N                                   | P/LP    | VUS  |          |          | Y            |                          |



eTable 4 Continued

| Code_n     | Gender | Age | Gene   | Phenotype                                            | Etiology of stroke   | Mutation                                 | Clinvar | ACMG | Definite | Possible | Undetermined | Insufficient Information |
|------------|--------|-----|--------|------------------------------------------------------|----------------------|------------------------------------------|---------|------|----------|----------|--------------|--------------------------|
| CNSR301010 | M      | 55  | PDE4D  | Acrodysostosis 2, with or without hormone resistance | Other disease        | NM_001197220:exon1:c.65+1G>A             | NA      | P    |          |          | Y            |                          |
| CNSR301223 | M      | 53  | SCN2B  | Hereditary cardiac dysrhythm                         | Embolic stroke       | NM_004588:exon2:c.C142G:p.L48V           | NA      | LP   |          |          | Y            |                          |
| CNSR301223 | M      | 53  | LDLR   | Hypercholesterolemia, familial, 1                    | Large artery disease | NM_000527:exon5:c.G805A:p.G269S          | P/LP    | VUS  | Y        |          |              |                          |
| CNSR301496 | M      | 47  | JAK2   | Thrombocytopenia 3                                   | Prothrombotic state  | NM_004972:exon14:c.G1849T:p.V617F        | P       | VUS  | Y        |          |              |                          |
| CNSR301496 | M      | 47  | NF1    | Neurofibromatosis 1                                  | Other disease        | NM_000267:exon25:c.3240delA:p.L1080fs    | NA      | LP   |          | Y        |              |                          |
| CNSR301738 | F      | 64  | FBN1   | Marfan syndrome                                      | Large artery disease | NM_000138:exon27:c.C3268G:p.P1090A       | NA      | LP   |          |          | Y            |                          |
| CNSR301738 | F      | 64  | RNF213 | Moyamoya disease                                     | Large artery disease | NM_001256071:exon60:c.G14429A:p.R4810K   | P       | VUS  |          | Y        |              |                          |
| CNSR301797 | M      | 77  | F2     | Thrombophilia due to thrombin defect                 | Prothrombotic state  | NM_000506:exon11:c.G1303A:p.E435K        | NA      | LP   |          |          | Y            |                          |
| CNSR301797 | M      | 77  | VWF    | von Willebrand disease, type 1                       | Prothrombotic state  | NM_000552:exon44:c.G7450A:p.V2484I       | LP      | VUS  |          |          | Y            |                          |
| CNSR302006 | M      | 46  | KCN A5 | Hereditary cardiac dysrhythm                         | Embolic stroke       | NM_002234:exon1:c.C1727T:p.A576V         | P       | VUS  |          |          | Y            |                          |
| CNSR302006 | M      | 46  | RNF213 | Moyamoya disease                                     | Large artery disease | NM_001256071:exon60:c.G14429A:p.R4810K   | P       | VUS  |          |          | Y            |                          |
| CNSR302050 | F      | 76  | KCN Q1 | Hereditary cardiac dysrhythm                         | Embolic stroke       | NM_000218:exon6:c.G815A:p.G272D          | P       | VUS  | Y        |          |              |                          |
| CNSR302050 | F      | 76  | TTN    | Hereditary cardiomyopathies                          | Embolic stroke       | NM_001267550:exon326:c.C85223G:p.S28408X | NA      | P    |          |          | Y            |                          |

eTable 4 Continued

| Code_n     | Gender | Age | Gene     | Phenotype                                        | Etiology of stroke   | Mutation                                    | Clinvar | ACMG | Definite | Possible | Undetermined | Insufficient Information |
|------------|--------|-----|----------|--------------------------------------------------|----------------------|---------------------------------------------|---------|------|----------|----------|--------------|--------------------------|
| CNSR302050 | F      | 76  | LDLR     | Hypercholesterolemia, familial, 1                | Large artery disease | NM_000527:exon13:c.G1898T;p.R633L           | NA      | P    | Y        |          |              |                          |
| CNSR302176 | M      | 63  | CETP     | Hyperalphalipoproteinemia                        | Large artery disease | NM_000078:exon2:c.T222G;p.Y74X              | NA      | LP   |          |          | Y            |                          |
| CNSR302176 | M      | 63  | F2       | Thrombophilia due to thrombin defect             | Prothrombotic state  | NM_000506:exon7:c.G691A;p.G231R             | NA      | LP   |          |          | Y            |                          |
| CNSR303412 | F      | 70  | GJA1     | Atrioventricular septal defect 3                 | Embolic stroke       | NM_000165:exon2:c.G158A;p.R53H              | NA      | LP   |          |          | Y            |                          |
| CNSR303412 | F      | 70  | KCN A5   | Hereditary cardiac dysrhythm                     | Embolic stroke       | NM_002234:exon1:c.C1727T;p.A576V            | P       | VUS  |          |          | Y            |                          |
| CNSR303485 | M      | 50  | JAK2     | Thrombocythemia 3                                | Prothrombotic state  | NM_004972:exon14:c.G1849T;p.V617F           | P       | VUS  |          |          | Y            |                          |
| CNSR303485 | M      | 50  | DYRK1B   | Abdominal obesity-metabolic syndrome 3           | Other disease        | NM_004714:exon8:c.C1072T;p.R358X            | NA      | P    |          |          | Y            |                          |
| CNSR303619 | M      | 65  | CETP     | Hyperalphalipoproteinemia                        | Large artery disease | NM_000078:exon11:c.1115_1127del;p.Q372fs    | NA      | LP   |          |          | Y            |                          |
| CNSR303619 | M      | 65  | COL4A2   | Brain small vessel disease 2                     | Small vessel disease | NM_001846:exon39:c.G3589A;p.G1197S          | NA      | LP   |          |          | Y            |                          |
| CNSR303839 | M      | 55  | TTN      | Hereditary cardiomyopathies                      | Embolic stroke       | NM_001267550:exon324:c.69145delA;p.I23049fs | NA      | LP   |          | Y        |              |                          |
| CNSR303839 | M      | 55  | SERPINC1 | Thrombophilia due to antithrombin III deficiency | Prothrombotic state  | NM_000488:exon3:c.T442C;p.S148P             | P       | VUS  |          |          | Y            |                          |
| CNSR303839 | M      | 55  | VWF      | von Willebrand disease, type 1                   | Prothrombotic state  | NM_000552:exon14:c.1614delC;p.P538          | NA      | LP   |          |          | Y            |                          |
| CNSR304342 | M      | 53  | KCN A5   | Hereditary cardiac dysrhythm                     | Embolic stroke       | NM_002234:exon1:c.C1727T;p.A576V            | P       | VUS  |          |          | Y            |                          |

eTable 4 Continued

| Code_n     | Gender | Age | Gene   | Phenotype                                        | Etiology of stroke   | Mutation                                      | Clinvar | ACMG | Definite | Possible | Undetermined | Insufficient Information |
|------------|--------|-----|--------|--------------------------------------------------|----------------------|-----------------------------------------------|---------|------|----------|----------|--------------|--------------------------|
| CNSR304342 | M      | 53  | TTN    | Hereditary cardiomyopathies                      | Embolic stroke       | NM_133379:exon46:c.C13231T:p.Q4411X           | NA      | LP   |          |          | Y            |                          |
| CNSR306238 | F      | 74  | CETP   | Hyperalphalipoproteinemia                        | Large artery disease | NM_000078:exon13:c.1225_1226insAGACT:p.K409fs | NA      | LP   |          |          | Y            |                          |
| CNSR306238 | F      | 74  | PRNP   | Cerebral amyloid angiopathy, PRNP-related        | Small vessel disease | NM_000311:exon2:c.G538A:p.V180I               | P/LP    | VUS  |          | Y        |              |                          |
| CNSR306857 | M      | 74  | TTN    | Hereditary cardiomyopathies                      | Embolic stroke       | NM_133379:exon46:c.13109delC:p.S4370X         | NA      | LP   |          |          | Y            |                          |
| CNSR306857 | M      | 74  | RNF213 | Moyamoya disease                                 | Large artery disease | NM_001256071:exon60:c.G14429A:p.R4810K        | P       | VUS  |          |          | Y            |                          |
| CNSR306857 | M      | 74  | F2     | Thrombophilia due to thrombin defect             | Prothrombotic state  | NM_000506:exon2:c.T80C:p.V27A                 | NA      | LP   |          |          | Y            |                          |
| CNSR306857 | M      | 74  | VWF    | von Willebrand disease, type 1                   | Prothrombotic state  | NM_000552:exon20:c.G2561A:p.R854Q             | P/LP    | VUS  |          |          | Y            |                          |
| CNSR307276 | M      | 53  | PROC   | Thrombophilia due to protein C deficiency, autos | Prothrombotic state  | NM_000312:exon9:c.G1000A:p.G334S              | P       | VUS  |          |          | Y            |                          |
| CNSR307276 | M      | 53  | COL4A2 | Brain small vessel disease 2                     | Small vessel disease | NM_001846:exon30:c.2577_2578insGG             | NA      | LP   |          |          |              | Y                        |
| CNSR307448 | M      | 64  | MFAP5  | Aortic aneurysm, familial thoracic 9             | Large artery disease | NM_003480:exon10:c.C472T:p.R158X              | P       | VUS  |          |          | Y            |                          |
| CNSR307448 | M      | 64  | TGIF1  | Holoprosencephaly 4                              | Other disease        | NM_173208:exon4:c.A451G:p.T151A               | P       | VUS  |          |          | Y            |                          |
| CNSR307803 | M      | 64  | VWF    | von Willebrand disease, type 1                   | Prothrombotic state  | NM_000552:exon22:c.C2965T:p.Q989X             | NA      | P    |          |          | Y            |                          |
| CNSR307803 | M      | 64  | NOTCH3 | CADASIL                                          | Small vessel disease | NM_000435:exon11:c.C1759T:p.R587C             | NA      | LP   | Y        |          |              |                          |

eTable 4 Continued

| Code_n     | Gender | Age | Gene   | Phenotype                                      | Etiology of stroke   | Mutation                                      | Clinvar | ACMG | Definite | Possible | Undetermined | Insufficient Information |
|------------|--------|-----|--------|------------------------------------------------|----------------------|-----------------------------------------------|---------|------|----------|----------|--------------|--------------------------|
| CNSR308769 | M      | 58  | ELN    | SVAS                                           | Large artery disease | splicing                                      | P       | P    |          |          | Y            |                          |
| CNSR308769 | M      | 58  | LDLR   | Hypercholesterolemia, familial, 1              | Large artery disease | NM_000527:exon10:c.G1567A:p.V523M             | P       | VUS  |          | Y        |              |                          |
| CNSR308831 | M      | 42  | COL4A2 | Brain small vessel disease 2                   | Small vessel disease | NM_001846:exon12:c.G701T:p.G234V              | NA      | LP   |          |          | Y            |                          |
| CNSR308831 | M      | 42  | PKD1   | ADPKD                                          | Other disease        | NM_001009944:exon45:c.G12391T:p.E4131X        | P       | P    |          |          | Y            |                          |
| CNSR309790 | M      | 57  | RBM20  | Hereditary cardiomyopathies                    | Embolic stroke       | NM_001134363:exon2:c.870delA:p.S290fs         | NA      | LP   |          |          | Y            |                          |
| CNSR309790 | M      | 57  | TTR    | Amyloidosis, hereditary, transthyretin-related | Small vessel disease | NM_000371:exon2:c.C170A:p.A57D                | NA      | LP   |          |          |              | Y                        |
| CNSR310131 | M      | 60  | MYBPC3 | Hereditary cardiomyopathies                    | Embolic stroke       | NM_000256:exon12:c.1042_1043insCGGCA:p.M348fs | P       | LP   |          |          | Y            |                          |
| CNSR310131 | M      | 60  | NOTCH3 | CADASIL                                        | Small vessel disease | NM_000435:exon11:c.C1630T:p.R544C             | P/LP    | VUS  | Y        |          |              |                          |
| CNSR310244 | M      | 53  | GATA4  | Tetralogy of Fallot                            | Embolic stroke       | NM_001308093:c.1000+103G>T                    | P       | VUS  |          |          | Y            |                          |
| CNSR310244 | M      | 53  | NF1    | Neurofibromatosis 1                            | Other disease        | NM_000267:exon14:c.1541_1542del:p.Q514fs      | P       | LP   |          | Y        |              |                          |
| CNSR310283 | M      | 59  | GJA5   | Hereditary cardiac dysrhythm                   | Embolic stroke       | NM_005266:exon2:c.C292T:p.H98Y                | NA      | LP   |          | Y        |              |                          |
| CNSR310283 | M      | 59  | NOTCH3 | CADASIL                                        | Small vessel disease | NM_000435:exon3:c.C328T:p.R110C               | P       | VUS  | Y        |          |              |                          |

**eTable 5 Four individuals with 2 P/LP variants in the *ABCC6* gene**

| Code       | Gender | Age | Gene  | Mutation                                 | Clinvar | ACMG | Phenotype                |
|------------|--------|-----|-------|------------------------------------------|---------|------|--------------------------|
| CNSR309580 | F      | 66  | ABCC6 | NM_001171: exon26: c.C3703T:<br>p.R1235W | P       | VUS  | Pseudoxanthoma elasticum |
| CNSR301384 | M      | 53  | ABCC6 | NM_001171: exon31: c.4404-1G>A           | NA      | P    | Pseudoxanthoma elasticum |
| CNSR301384 | M      | 53  | ABCC6 | NM_001171: exon24: c.C3490T:<br>p.R1164X | P       | P    | Pseudoxanthoma elasticum |
| CNSR309564 | M      | 37  | ABCC6 | NM_001171: exon26: c.C3703T:<br>p.R1235W | P       | VUS  | Pseudoxanthoma elasticum |
| CNSR309564 | M      | 37  | ABCC6 | NM_001171: exon28: c.G3892A:<br>p.V1298I | NA      | LP   | Pseudoxanthoma elasticum |
| CNSR310336 | M      | 48  | ABCC6 | NM_001171: exon26: c.3735+1G>T           | NA      | P    | Pseudoxanthoma elasticum |
| CNSR310336 | M      | 48  | ABCC6 | NM_001171: exon23: c.C3304T:<br>p.Q1102X | NA      | P    | Pseudoxanthoma elasticum |

**eTable 6 Characteristics of the Patients with one MGD in C3 cohort**

| Characteristic                      | ToTal (N=759) | Embolic stroke (N=245, 32.28) | Large artery disease (N=184, 24.24) | Prothrombotic state (N=124, 16.34) | Small vessel disease (N=148, 19.50) | Other disease (N=58, 7.64) |
|-------------------------------------|---------------|-------------------------------|-------------------------------------|------------------------------------|-------------------------------------|----------------------------|
| Age at time of study entry, mean±SD | 61.53±11.50   | 61.91±12.23                   | 60.43±12.22                         | 62.78±10.54                        | 61.52±10.59                         | 60.71±10.05                |
| ≤45 yr                              | 66 (8.70)     | 21 (8.57)                     | 21 (11.41)                          | 8 (6.45)                           | 13 (8.78)                           | 4 (6.90)                   |
| > 45 yr                             | 693 (91.30)   | 226 (92.24)                   | 163 (88.59)                         | 116 (93.55)                        | 135 (91.22)                         | 54 (93.10)                 |
| Male, n (%)                         | 504 (66)      | 162 (66.12)                   | 119 (64.67)                         | 89 (71.77)                         | 98 (66.22)                          | 36 (62.07)                 |
| Medical history, n (%)              |               |                               |                                     |                                    |                                     |                            |
| Ischaemic stroke                    | 193 (25.43)   | 56 (22.86)                    | 42 (22.83)                          | 30 (24.19)                         | 47 (31.76)                          | 18 (31.03)                 |
| Coronary heart diseases             | 98 (12.91)    | 36 (14.69)                    | 15 (8.15)                           | 17 (13.71)                         | 22 (14.86)                          | 8 (13.79)                  |
| Atrial fibrillation                 | 64 (8.43)     | 25 (10.20)                    | 14 (7.61)                           | 10 (8.06)                          | 9 (6.08)                            | 6 (10.35)                  |
| Hypertension                        | 452 (59.55)   | 139 (56.73)                   | 119 (64.67)                         | 71 (57.26)                         | 81 (54.73)                          | 42 (72.41)                 |
| Diabetes mellitus                   | 177 (23.32)   | 57 (23.27)                    | 45 (24.46)                          | 29 (23.39)                         | 28 (18.92)                          | 18 (31.03)                 |
| Dyslipidemia                        | 68 (8.96)     | 26 (10.61)                    | 10 (5.43)                           | 8 (6.45)                           | 18 (12.12)                          | 6 (10.35)                  |
| Stroke type                         |               |                               |                                     |                                    |                                     |                            |
| IS                                  | 718 (94.60)   | 233 (95.10)                   | 171 (92.93)                         | 119 (95.97)                        | 142 (95.95)                         | 53 (91.38)                 |
| TIA                                 | 41 (5.40)     | 12 (4.90)                     | 13 (7.07)                           | 5 (4.03)                           | 6 (4.05)                            | 5 (8.62)                   |
| Family history of Stroke            | 97 (12.78)    | 38 (15.51)                    | 24 (13.04)                          | 13 (10.48)                         | 15 (10.14)                          | 7 (12.07)                  |
| CCS                                 |               |                               |                                     |                                    |                                     |                            |
| Large artery atherosclerosis        | 220 (28.99)   | 66 (26.94)                    | 70 (38.04)                          | 33 (26.61)                         | 40 (27.03)                          | 11 (18.97)                 |
| Cardioaortic embolism               | 57 (7.51)     | 27 (11.02)                    | 10 (5.43)                           | 6 (4.84)                           | 8 (5.41)                            | 6 (10.35)                  |
| Small arterial occlusion            | 191 (25.16)   | 66 (26.94)                    | 36 (19.57)                          | 27 (21.77)                         | 43 (29.05)                          | 19 (32.76)                 |
| Other etiologies                    | 11 (1.45)     | 1 (0.41)                      | 6 (3.26)                            | 1 (0.81)                           | 3 (2.03)                            | 0 (0.00)                   |
| Undetermined etiology               | 280 (36.89)   | 85 (34.69)                    | 62 (33.70)                          | 57 (45.97)                         | 54 (36.49)                          | 22 (37.93)                 |

**eTable 7 The characteristics of individuals who had been diagnosed monogenic stroke before gene testing**

| Code_n     | Mendelian caused of stroke through EHR reviewed | Gene                             | Age | Gender |
|------------|-------------------------------------------------|----------------------------------|-----|--------|
| CNSR301140 | Thrombocytopenia                                | JAK2;exon11:c.G1402T;p.V468F,    | 67  | Female |
| CNSR301496 | Thrombocytopenia                                | JAK2;exon11:c.G1402T;p.V468F,    | 47  | Male   |
| CNSR302832 | Thrombocytopenia                                | JAK2;exon11:c.G1402T;p.V468F,    | 63  | Male   |
| CNSR307039 | Thrombocytopenia                                | JAK2;exon11:c.G1402T;p.V468F,    | 66  | Male   |
| CNSR307566 | Thrombocytopenia                                | JAK2;exon11:c.G1402T;p.V468F,    | 62  | Female |
| CNSR309872 | Thrombocytopenia                                | JAK2;exon11:c.G1402T;p.V468F,    | 75  | Male   |
| CNSR303251 | Small vessel disease, CADASIL                   | NOTCH3;exon11:c.C1630T;p.R544C   | 64  | Female |
| CNSR305508 | Small vessel disease, CADASIL                   | NOTCH3;exon11:c.C1630T;p.R544C   | 57  | Male   |
| CNSR306929 | Small vessel disease, CADASIL                   | NOTCH3;exon11:c.C1630T;p.R544C   | 39  | Male   |
| CNSR307912 | Small vessel disease, CADASIL                   | NOTCH3;exon11:c.C1630T;p.R544C   | 65  | Male   |
| CNSR308967 | Small vessel disease, CADASIL                   | NOTCH3;exon11:c.C1819T;p.R607C   | 63  | Male   |
| CNSR301757 | Small vessel disease, CADASIL                   | NOTCH3;exon18:c.C2898A;p.C966X   | 46  | Male   |
| CNSR310283 | Small vessel disease, CADASIL                   | NOTCH3;exon3:c.C328T;p.R110C     | 59  | Male   |
| CNSR307044 | Small vessel disease, CADASIL                   | NOTCH3;exon4:c.G671A;p.C224Y     | 52  | Female |
| CNSR302455 | Moyamoya                                        | RNF213;exon60:c.G14429A;p.R4810K | 27  | Female |
| CNSR304840 | Moyamoya,PFO?                                   | RNF213;exon60:c.G14429A;p.R4810K | 30  | Male   |
| CNSR306251 | Moyamoya                                        | RNF213;exon60:c.G14429A;p.R4810K | 48  | Female |
